# Supplementary material
Source: PubMed Central journal article supplement (PMC4440337)
Supplement: NIHMS591698-supplement.pdf [file NIHMS591698-supplement.pdf]

## Supplemental information

André Wegner,<sup>\*,†,‡</sup> Daniel Weindl,<sup>†</sup> Christian Jäger,<sup>†</sup> Sean C. Sapcariu,<sup>†</sup> Xiangyi Dong,<sup>†</sup> Gregory Stephanopoulos,<sup>‡</sup> and Karsten Hiller<sup>†</sup>

*University of Luxembourg, Luxembourg Centre for Systems Biomedicine, 7, avenue des Hauts-Fourneaux, L-4362 Esch-Belval, Luxembourg, and Massachusetts Institute of Technology, Department of Chemical Engineering, 77 Massachusetts Ave., 56-439, Cambridge, MA 02140, USA*

E-mail: andre.wegner@uni.lu

---

\*To whom correspondence should be addressed

<sup>†</sup>University of Luxembourg

<sup>‡</sup>Massachusetts Institute of Technology

## Material and Methods

### Yeast strain and growth conditions

For preculture, the *Saccharomyces cerevisiae* strain S90 (mat  $\alpha$ ) was grown in Yeast extract, Peptone, Dextrose (YPD) medium containing 10 g/l yeast extract (Merck), 20 g/l peptone (Merck) and 20 g/l D-glucose (Sigma-Aldrich). Yeast Nitrogen Base (YNB) medium was used for the overnight and main cultivation containing 0.67 g/l Difco Yeast Nitrogen Base Without Amino Acids (BD Biosciences) and D-glucose,  $c = 60$  mmol/l (Sigma-Aldrich) or [U- $^{13}\text{C}$ ] D-glucose,  $c = 60$  mmol/l (Cambridge Isotope Laboratories) as sole carbon source, respectively. Aerobic cultures were grown in 25-ml-Erlenmeyer flasks with 5 ml of medium. All cultivations were carried out at 30 °C and 200 rpm on a rotary shaker (Infors Multitron). Cell growth was monitored by the cell density in a cell density meter (Biowave CO8000). To obtain fully labelled extracts two overnight cultivations were applied before main culture.

### Cell harvesting and metabolite extraction

For quenching, cells were transferred in 25 ml cold methanol (60%, v/v; -20 °C), followed by centrifugation at 3900 $\times$ g for 3 min at -10 °C. Cells were washed with pre-cooled 20 ml 0.9% NaCl (w/v) solution and the centrifugation step was repeated. The remaining cell pellet was resuspended in 1 ml 50% cold methanol (v/v) and transferred in a reaction tube, prefilled with 0.6 g acid-washed glass beads ( $\emptyset$  150-212  $\mu\text{m}$ , Sigma-Aldrich). For cell lysis, a Precellys24 (Bertin) homogenizer was used with the following conditions: 2 x 30 s at 6800 rpm and 30 s pause in-between. The temperature was hold around 0 °C by using the Cryolys cooling option. Then 500  $\mu\text{l}$  chloroform were added followed by 1 min mixing and centrifugation at 14000 $\times$ g for 5 min at 4 °C. For analysis of polar and non-polar metabolites, 100  $\mu\text{l}$  of the aqueous phase as well as 150  $\mu\text{l}$  of the chloroform phase were transferred to glass vials with micro inserts. Prior to GC/MS analysis, samples were dried using a CentriVap Concentrator (Labconco) at -4 °C.

## Metabolite derivatization

Metabolite derivatization was performed by using a multi purpose sampler (Gerstel). For trimethylsilyl (TMS) derivatization, dried samples were dissolved in 15  $\mu$ l pyridine (Sigma-Aldrich), containing 20 mg/ml methoxyamine hydrochloride (Sigma-Aldrich), at 40 °C for 60 min under shaking. After adding 15  $\mu$ l *N*-Methyl-*N*-(trimethylsilyl)trifluoroacetamide (Sigma-Aldrich) or *N*-Methyl-*N*-(trimethyl-*d*<sub>9</sub>-silyl)trifluoroacetamide (Sigma-Aldrich) samples were incubated at 40 °C for 30 min under continuous shaking. For *tert*-butyldimethylsilyl (TBDMS) derivatization, dried samples were dissolved in 15  $\mu$ l pyridine, containing 20 mg/ml methoxyamine hydrochloride, at 55 °C for 60 min under shaking. After adding 15  $\mu$ l *N-tert*-Butyldimethylsilyl-*N*-methyltrifluoroacetamide with 1% *tert*-Butyldimethylchlorosilane (Sigma-Aldrich) samples were incubated at 55 °C for 60 min under continuous shaking.

## GC/MS analysis

GC/MS analysis was performed by using an Agilent 7890A GC coupled to an Agilent 5975C inert XL MSD. A sample volume of 1  $\mu$ l was injected into a Split/Splitless inlet operating in split mode (split ratio 3:1; MeOX/TMS derivatization) or splitless mode (MeOX/TBDMS derivatization) at 270 °C. The gas chromatograph was equipped with a 30 m x 0.25 mm I.D. x 0.25  $\mu$ m film thickness DB-35MS capillary column + 5 m DuraGuard capillary in front of the analytical column. Helium was used as carrier gas with a constant flow rate of 1 ml/min. For MeOX/TMS derivatized samples, the GC oven temperature was held at 80 °C for 6 min and increased to 300 °C at 6 °C/min. After 10 min, the temperature was increased at 10 °C/min followed by an additional constant temperature period at 325 °C for 4 min. For MeOX/TBDMS derivatized samples, the GC oven temperature was held at 100 °C for 3 min and increased to 300 °C at 3.5 °C/min. The transfer line temperature was set constantly to 280 °C. The MSD was operating under electron ionization at 70 eV. The MS source was held at 230 °C and the quadrupole at 150 °C. Full scan mass spectra were acquired from *m/z* 70 to 800. The total run time for MeOX/TMS derivatized samples was 59.167 min and 60.143 min for MeOX/TBDMS derivatized samples.

## **Results and Discussion**

Table 1

| Amino acid | m/z | Carbon Atoms | FFC <sup>†</sup> | Formula                                                                       | FFC <sup>‡</sup> |
|------------|-----|--------------|------------------|-------------------------------------------------------------------------------|------------------|
| Ala        | 232 | 2-3          | ✓                | C <sub>10</sub> H <sub>26</sub> NOSi <sub>2</sub>                             | ✓                |
|            | 260 | 1-3          | ✓                | C <sub>11</sub> H <sub>26</sub> NO <sub>2</sub> Si <sub>2</sub>               | ✓                |
| Gly        | 218 | 2            | ✓                | C <sub>9</sub> H <sub>24</sub> NOSi <sub>2</sub>                              | ✓                |
|            | 246 | 1-2          | ✓                | C <sub>10</sub> H <sub>24</sub> NO <sub>2</sub> Si <sub>2</sub>               | ✓                |
| Val        | 260 | 2-5          | ✓                | C <sub>12</sub> H <sub>30</sub> NOSi <sub>2</sub>                             | ✓                |
|            | 288 | 1-5          | ✓                | C <sub>13</sub> H <sub>30</sub> NO <sub>2</sub> Si <sub>2</sub>               | ✓                |
| Leu        | 200 | 2-6          | ✓                | C <sub>11</sub> H <sub>26</sub> NSi                                           | ✓                |
|            | 274 | 2-6          | X                | C <sub>13</sub> H <sub>32</sub> NOSi <sub>2</sub>                             | ✓                |
|            | 302 | 1-6          | ✓                | C <sub>14</sub> H <sub>32</sub> NO <sub>2</sub> Si <sub>2</sub>               | ✓                |
| Ile        | 200 | 2-6          | ✓                | C <sub>11</sub> H <sub>26</sub> NSi                                           | ✓                |
|            | 274 | 2-6          | X                | C <sub>13</sub> H <sub>32</sub> NOSi <sub>2</sub>                             | ✓                |
|            | 302 | 1-6          | ✓                | C <sub>14</sub> H <sub>32</sub> NO <sub>2</sub> Si <sub>2</sub>               | ✓                |
| Ser        | 288 | 2-3          | ✓                | C <sub>14</sub> H <sub>34</sub> NOSi <sub>2</sub>                             | ✓                |
|            | 302 | 1-2          | ✓                | C <sub>14</sub> H <sub>32</sub> NO <sub>2</sub> Si <sub>2</sub>               | ✓                |
|            | 362 | 2-3          | ✓                | C <sub>16</sub> H <sub>40</sub> NO <sub>2</sub> Si <sub>3</sub>               | ✓                |
| Thr        | 390 | 1-3          | ✓                | C <sub>17</sub> H <sub>40</sub> NO <sub>3</sub> Si <sub>3</sub>               | ✓                |
|            | 376 | 2-4          | X                | C <sub>17</sub> H <sub>42</sub> NO <sub>2</sub> Si <sub>3</sub>               | X                |
|            | 404 | 1-4          | ✓                | C <sub>18</sub> H <sub>42</sub> NO <sub>3</sub> Si <sub>3</sub>               | ✓                |
| Met        | 218 | 2-5          | ✓                | C <sub>10</sub> H <sub>24</sub> NSSi                                          | ✓                |
|            | 292 | 2-5          | ✓                | C <sub>12</sub> H <sub>30</sub> NOSSi <sub>2</sub>                            | ✓                |
|            | 320 | 1-5          | ✓                | C <sub>13</sub> H <sub>30</sub> NO <sub>2</sub> SSi <sub>3</sub>              | ✓                |
| Phe        | 234 | 2-9          | ✓                | C <sub>14</sub> H <sub>24</sub> NSi                                           | ✓                |
|            | 302 | 1-2          | ✓                | C <sub>14</sub> H <sub>32</sub> NO <sub>2</sub> Si <sub>2</sub>               | ✓                |
|            | 308 | 2-9          | ✓                | C <sub>16</sub> H <sub>30</sub> NOSi <sub>2</sub>                             | ✓                |
| Asp        | 336 | 1-9          | ✓                | C <sub>17</sub> H <sub>30</sub> NO <sub>2</sub> Si <sub>3</sub>               | ✓                |
|            | 302 | 1-2          | ✓                | C <sub>14</sub> H <sub>32</sub> NO <sub>2</sub> Si <sub>2</sub>               | ✓                |
|            | 376 | 1-2          | ✓                | C <sub>16</sub> H <sub>38</sub> NO <sub>3</sub> Si <sub>3</sub>               | ✓                |
| Glu        | 390 | 2-4          | X                | C <sub>17</sub> H <sub>40</sub> NO <sub>3</sub> Si <sub>3</sub>               | ✓                |
|            | 418 | 1-4          | ✓                | C <sub>18</sub> H <sub>40</sub> NO <sub>4</sub> Si <sub>3</sub>               | ✓                |
|            | 330 | 2-5          | X                | C <sub>16</sub> H <sub>36</sub> NO <sub>2</sub> Si <sub>2</sub>               | ✓                |
| Lys        | 432 | 1-5          | ✓                | C <sub>19</sub> H <sub>42</sub> NO <sub>4</sub> Si <sub>3</sub>               | ✓                |
|            | 329 | 2-6          | ✓                | C <sub>17</sub> H <sub>41</sub> N <sub>2</sub> Si <sub>2</sub>                | ✓                |
| Tyr        | 431 | 1-6          | ✓                | C <sub>20</sub> H <sub>47</sub> N <sub>2</sub> O <sub>2</sub> Si <sub>3</sub> | ✓                |
|            | 302 | 1-2          | ✓                | C <sub>14</sub> H <sub>32</sub> NO <sub>2</sub> Si <sub>2</sub>               | ✓                |
|            | 364 | 2-8          | ✓                | C <sub>20</sub> H <sub>38</sub> NOSi <sub>2</sub>                             | ✓                |

# Adenine 2TMS

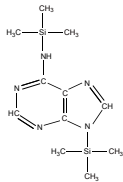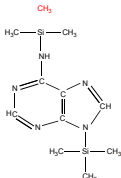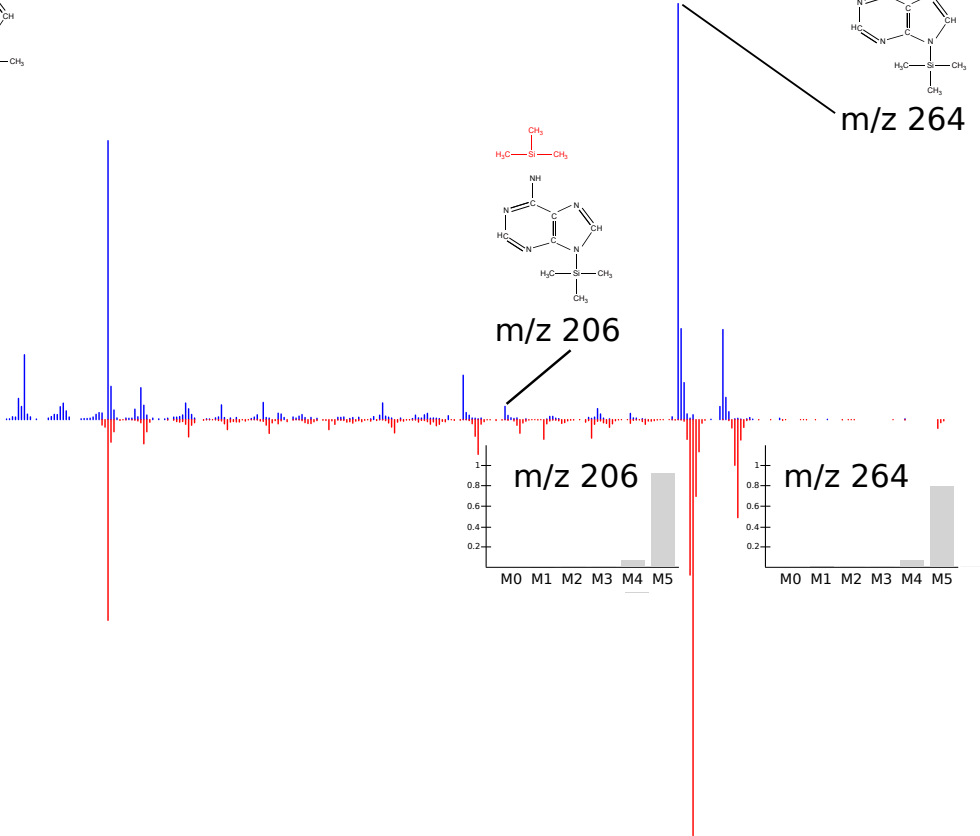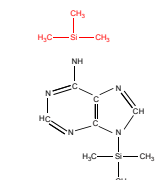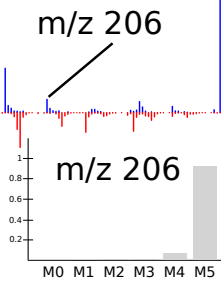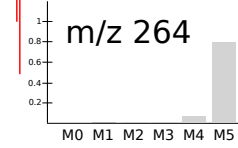

# <sup>13</sup>C<sub>5</sub> Adenine 2TMS

**Alanine 2TMS**

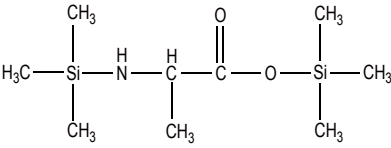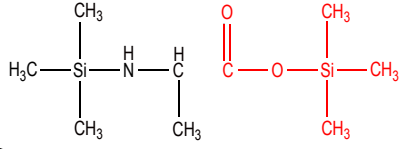

m/z 116

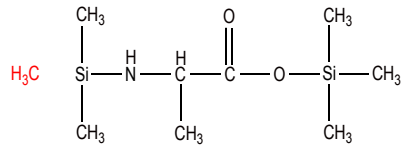

m/z 218

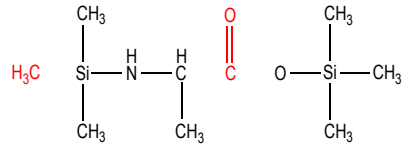

m/z 190

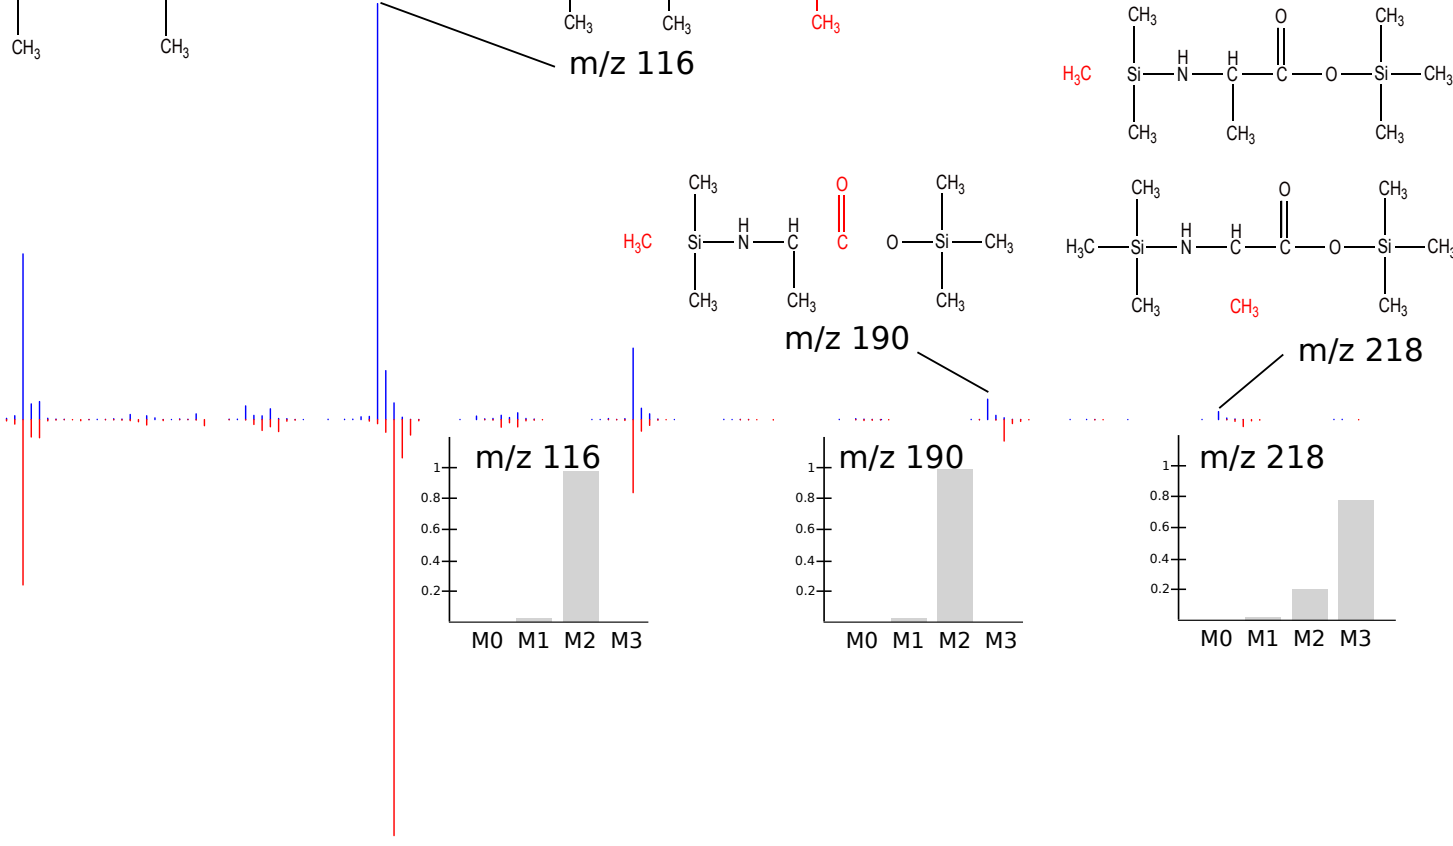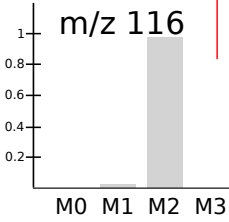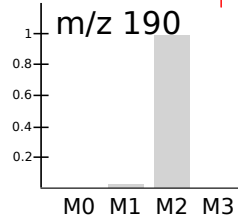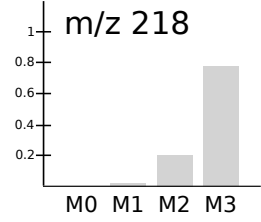

**<sup>13</sup>C<sub>3</sub> Alanine 2TMS**

### Aspartic acid 2TMS

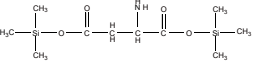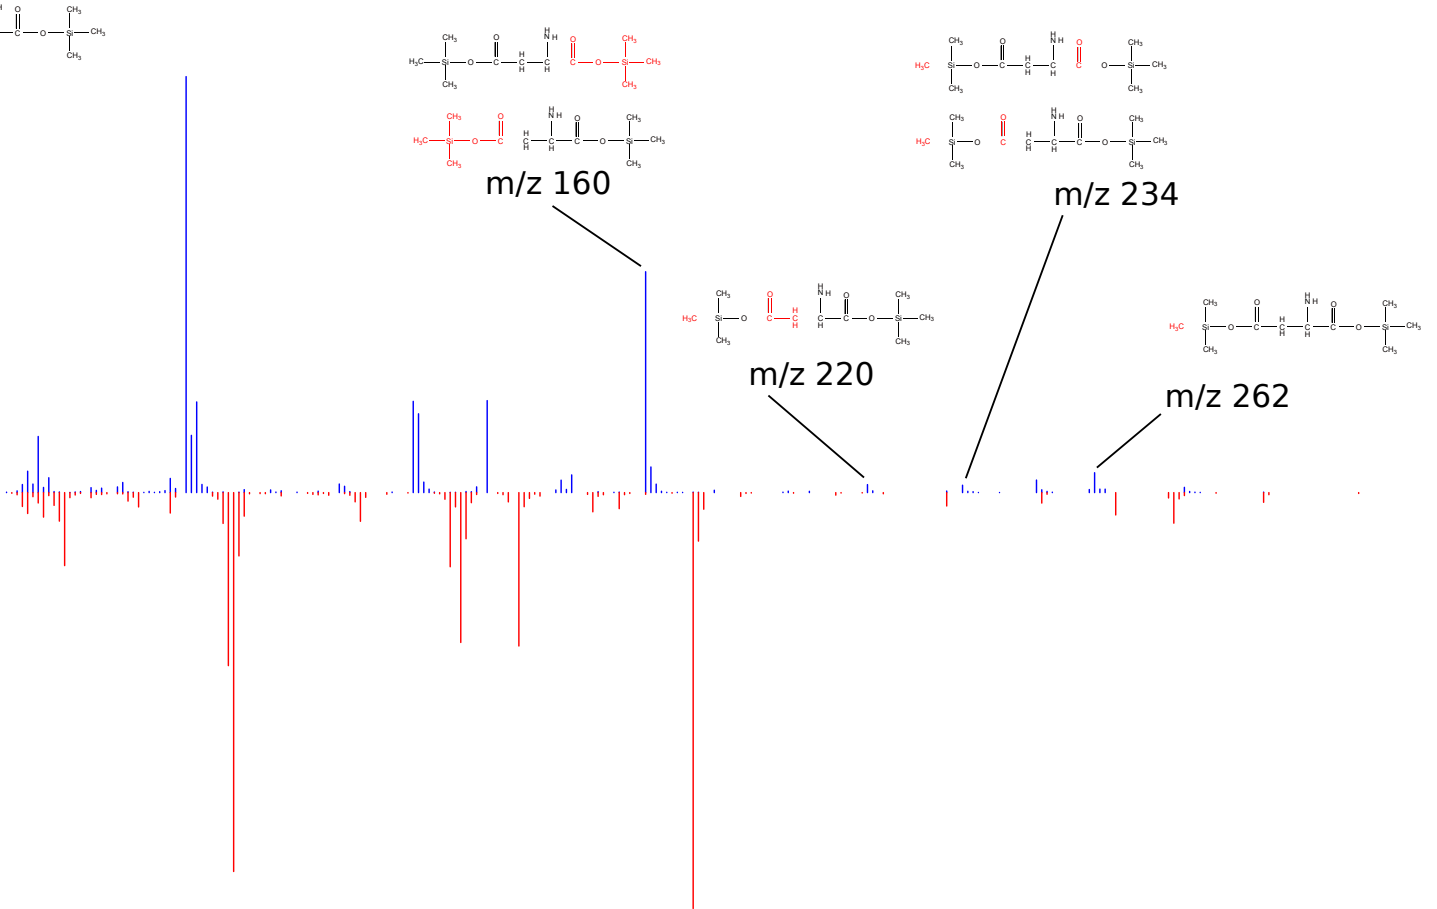

### Aspartic acid $d_9$ -2TMS



**Aspartic acid 3TMS**

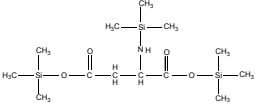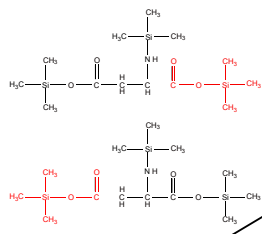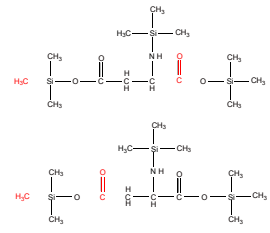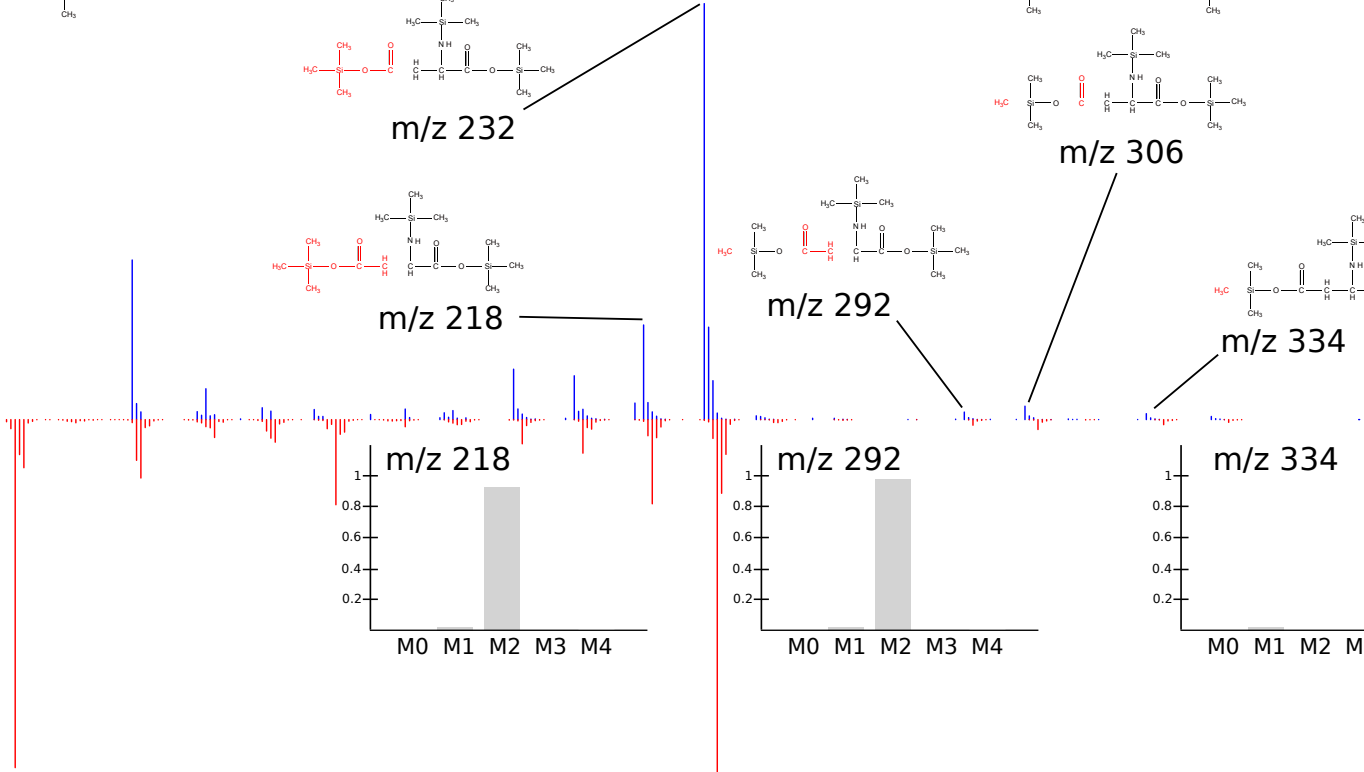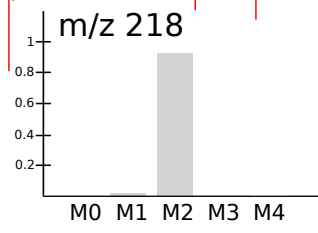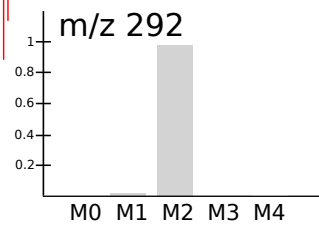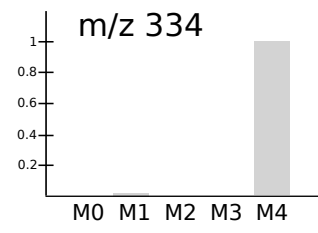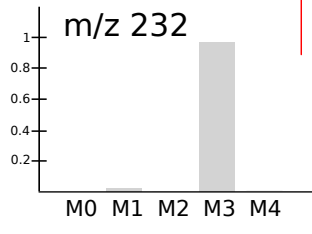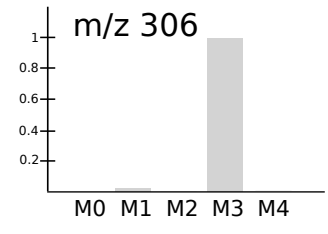

**<sup>13</sup>C<sub>4</sub> Aspartic acid 3TMS**

### beta-Alanine 3TMS

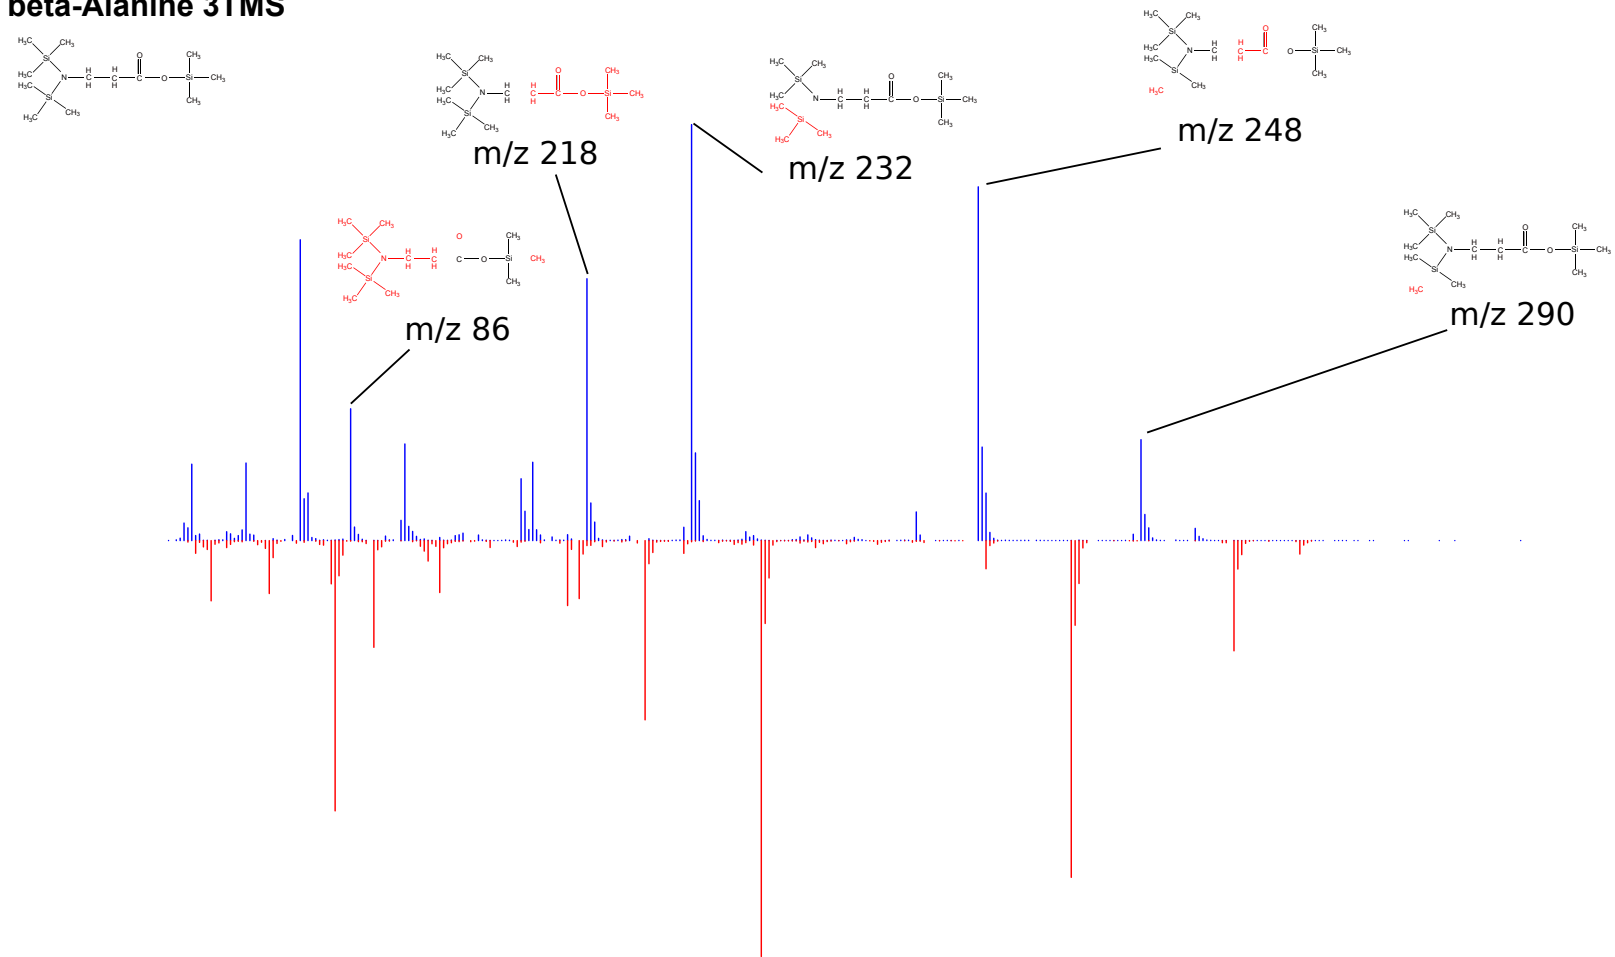

### beta-Alanine $d_9$ -3TMS

**Citric acid 4TMS**

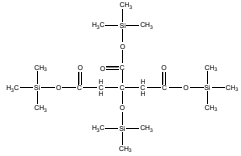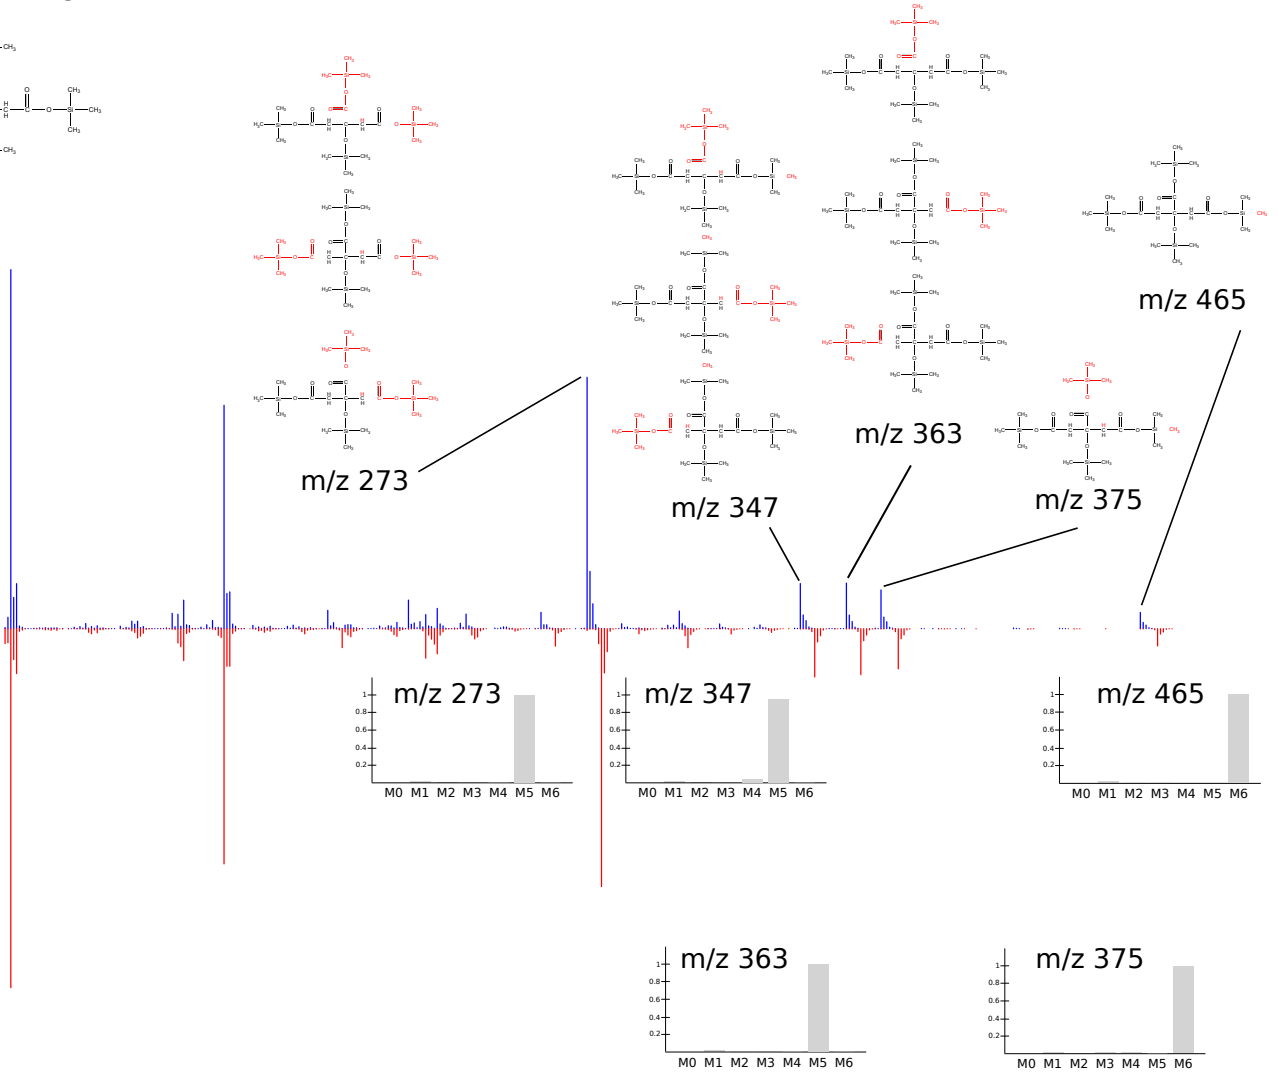

**<sup>13</sup>C<sub>6</sub> Citric acid 4TMS**

# Glutamic acid 3TMS

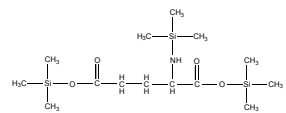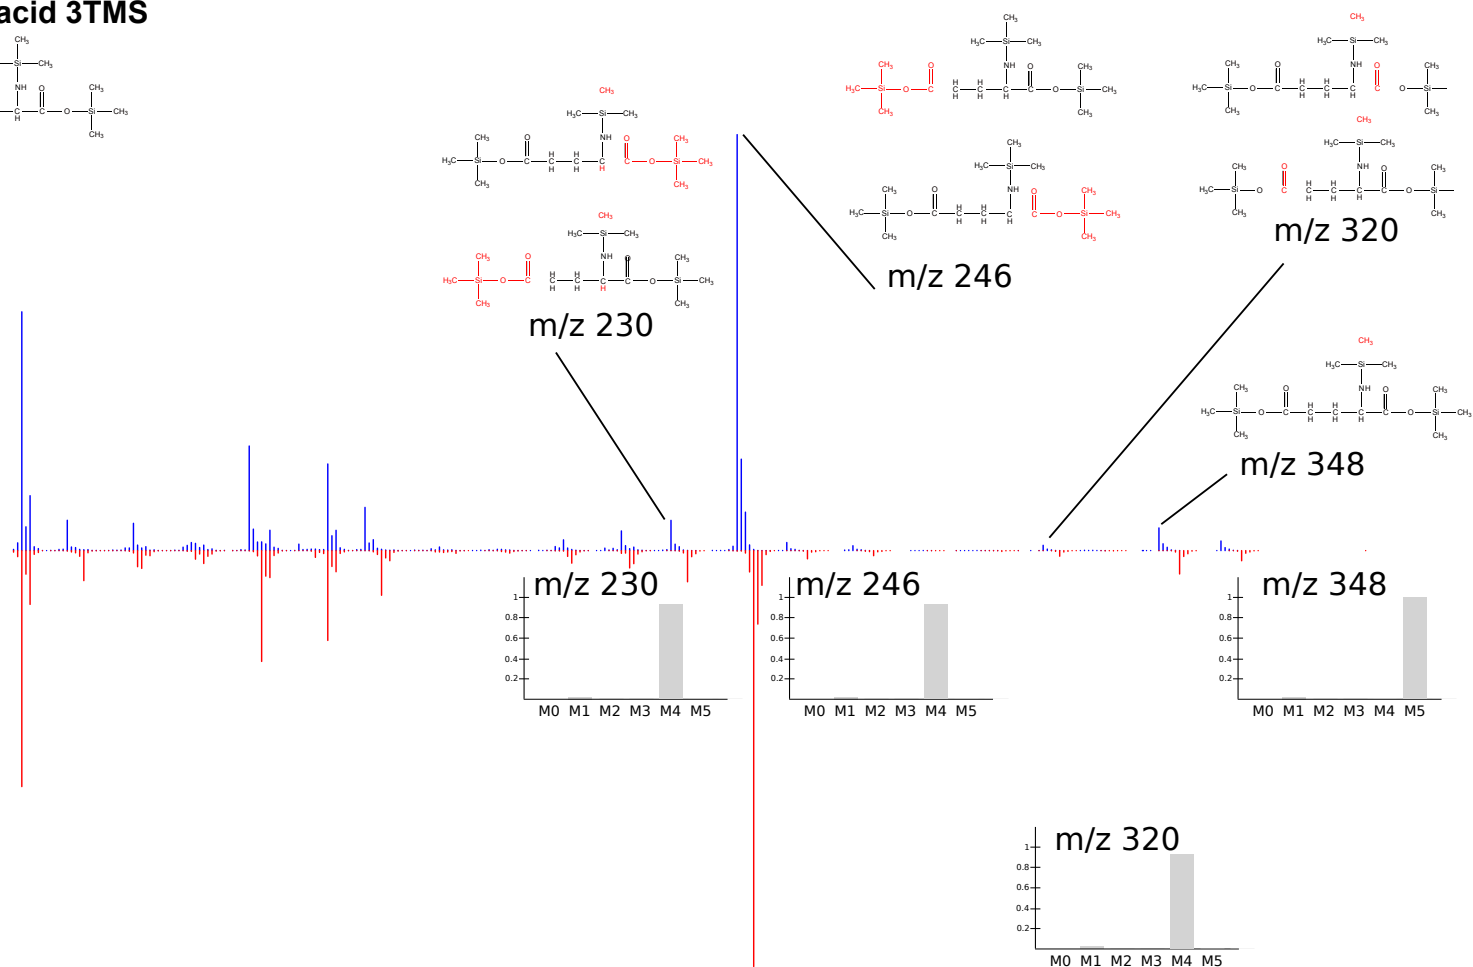

# <sup>13</sup>C<sub>5</sub> Glutamic acid 3TMS

# Glutamine 3TMS

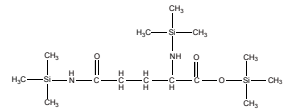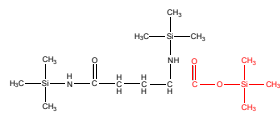

m/z 245

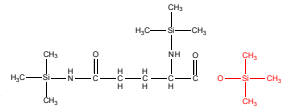

m/z 273

m/z 347

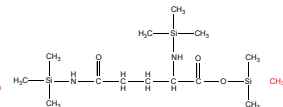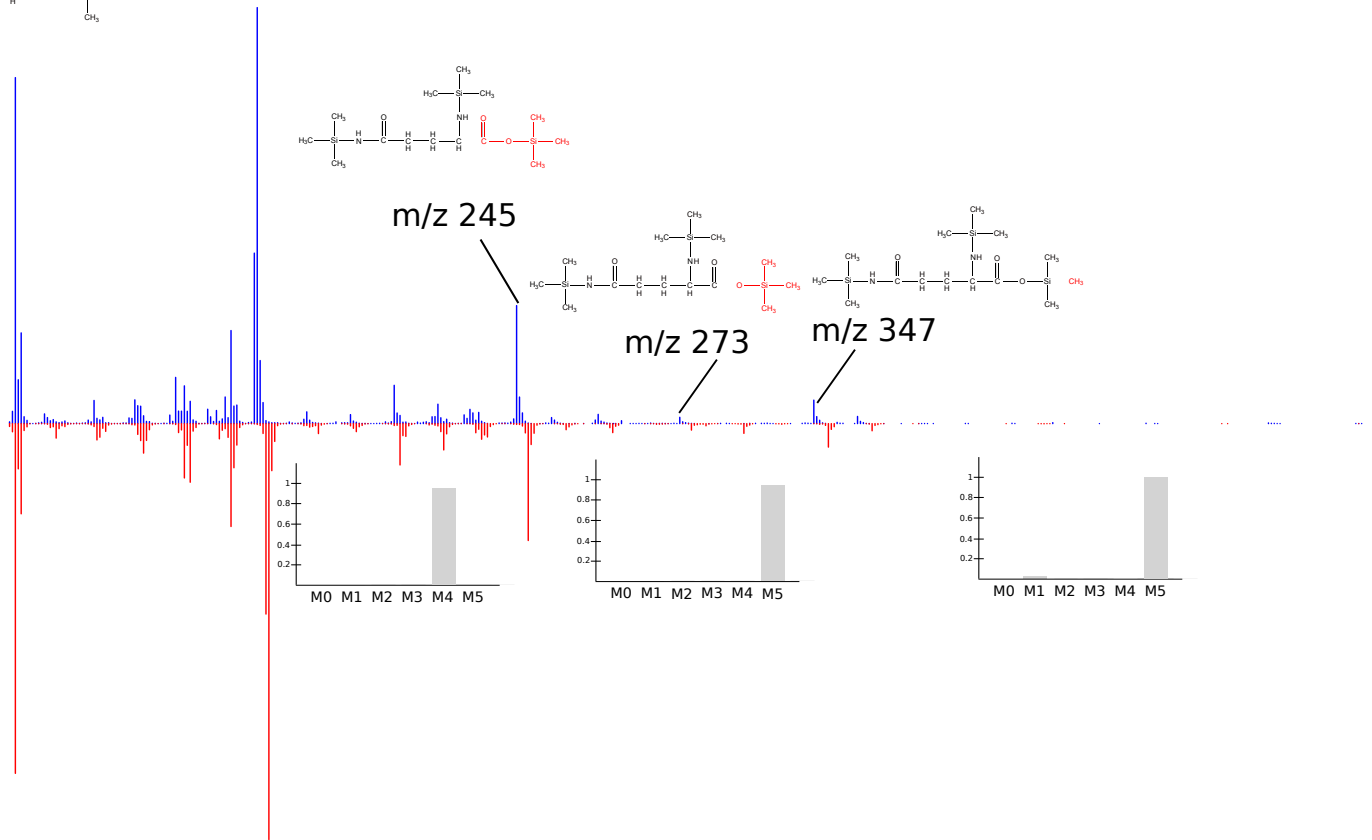

# <sup>13</sup>C<sub>5</sub> Glutamine 3TMS

### 3-phosphoglycerate 4TMS

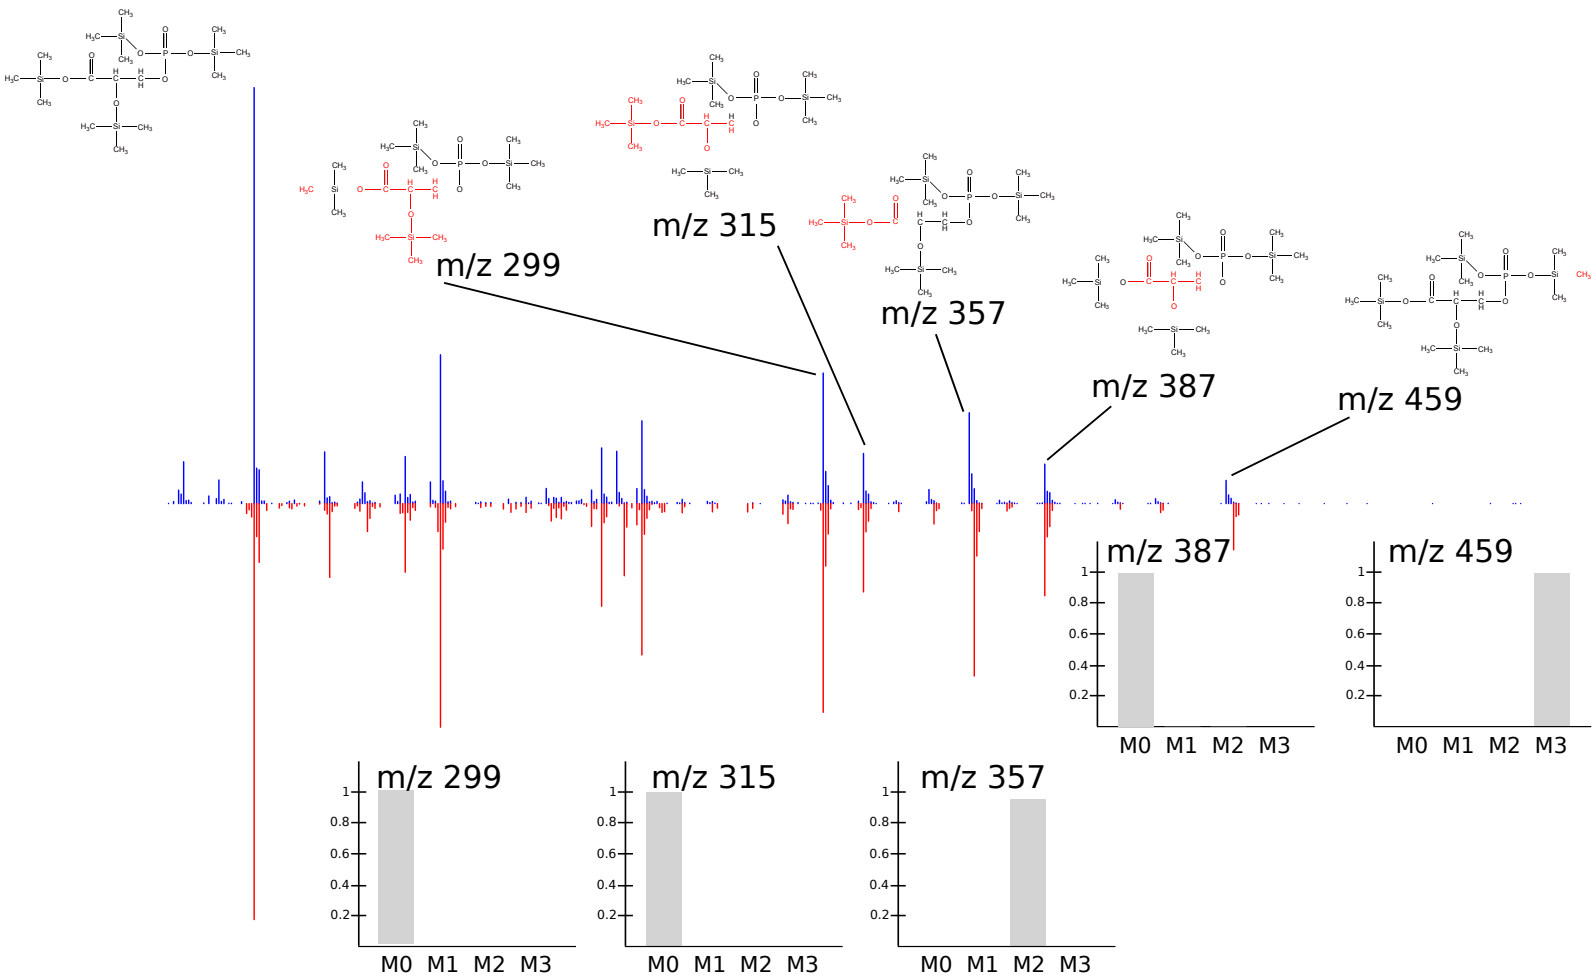

### <sup>13</sup>C<sub>3</sub> 3-phosphoglycerate 4TMS

# Glycerol-3-phosphate 4TMS

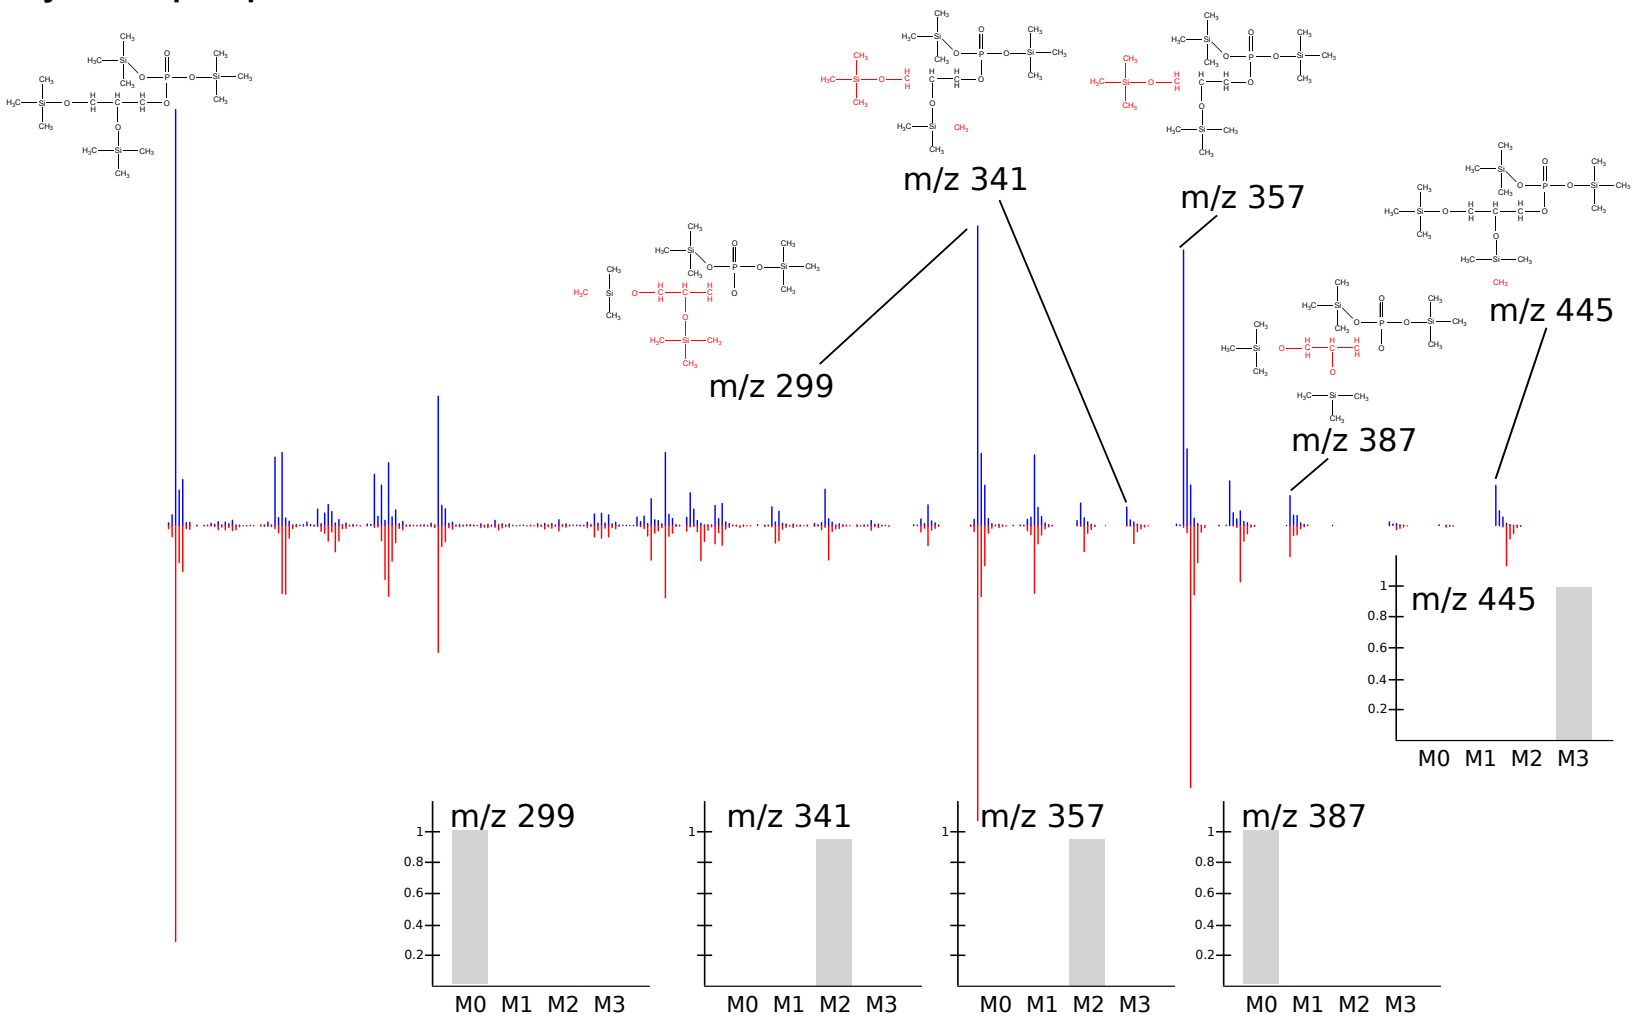

# <sup>13</sup>C<sub>3</sub> Glycerol-3-phosphate 4TMS

**Glycerol 3TMS**

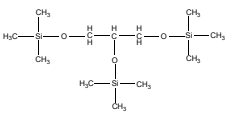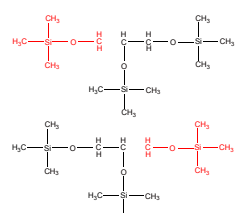

m/z 205

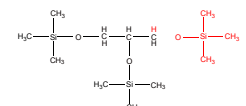

m/z 218

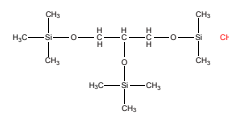

m/z 293

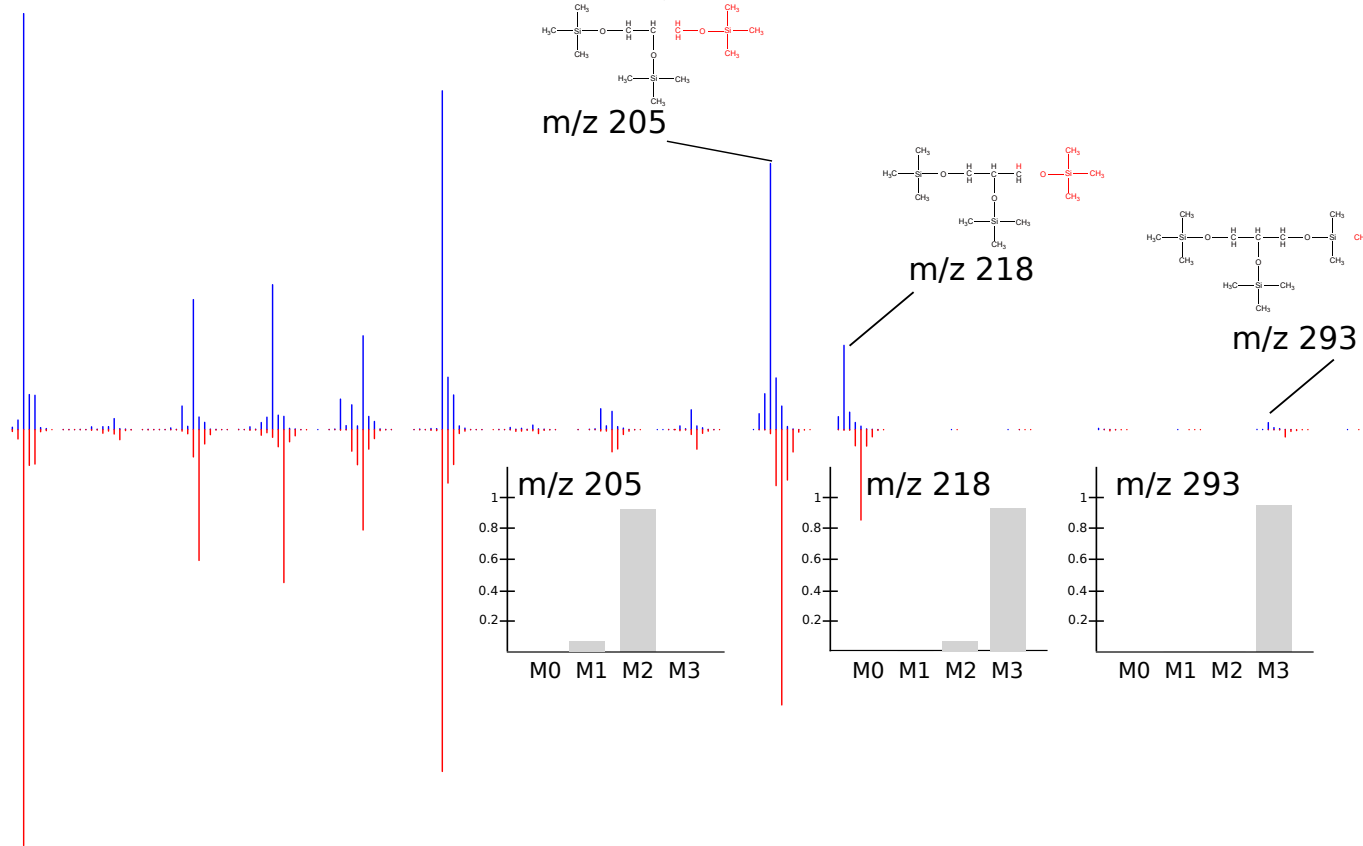

**<sup>13</sup>C<sub>3</sub> Glycerol 3TMS**



**Glycine 2 TMS**

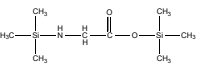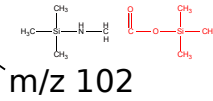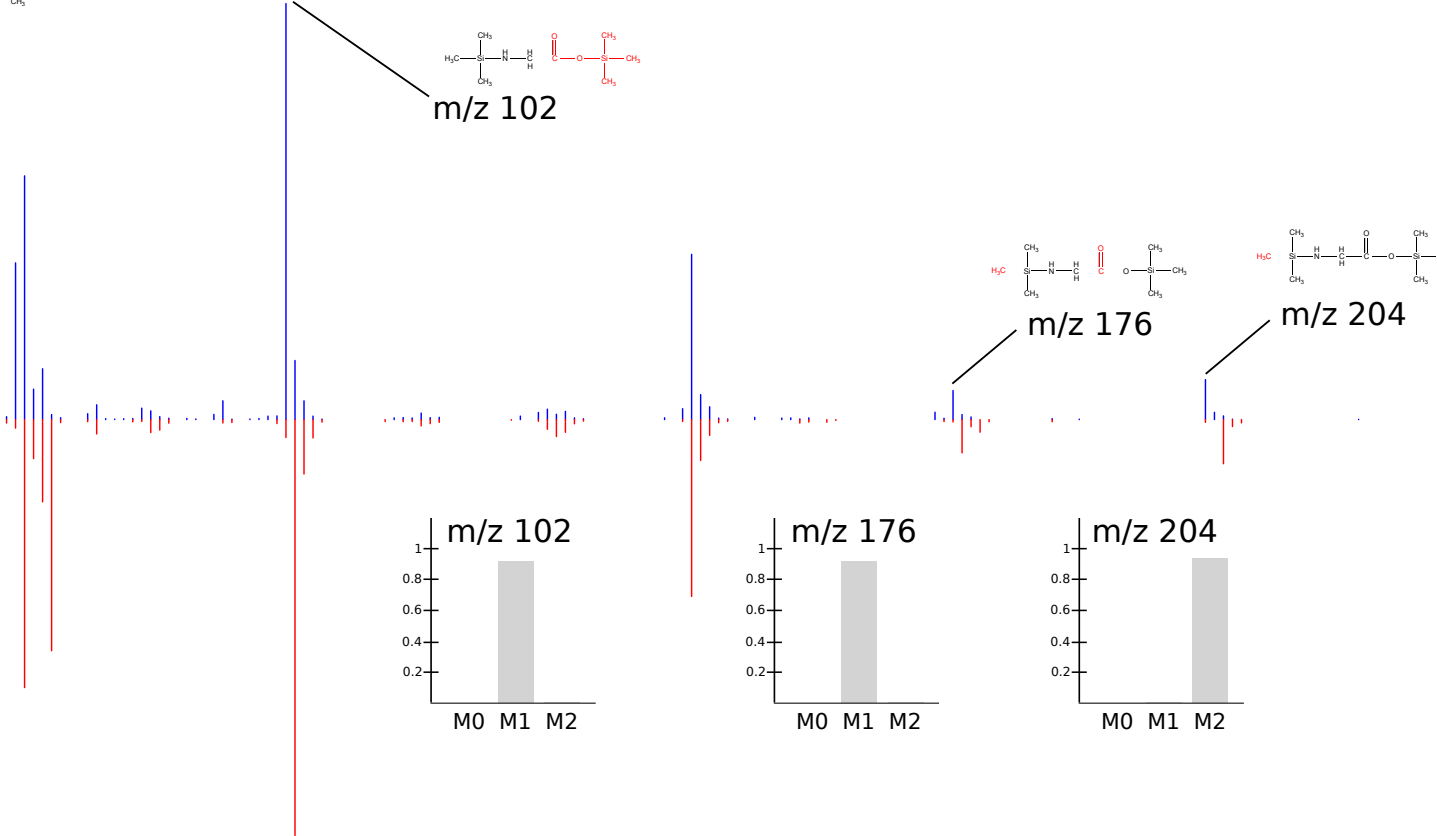

**$^{13}\text{C}_2$  Glycine 2 TMS**

**Glycine 3TMS**

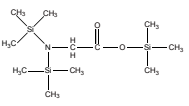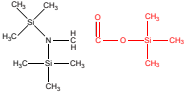

m/z 174

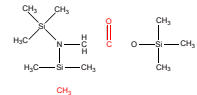

m/z 248

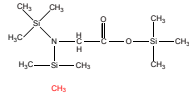

m/z 276

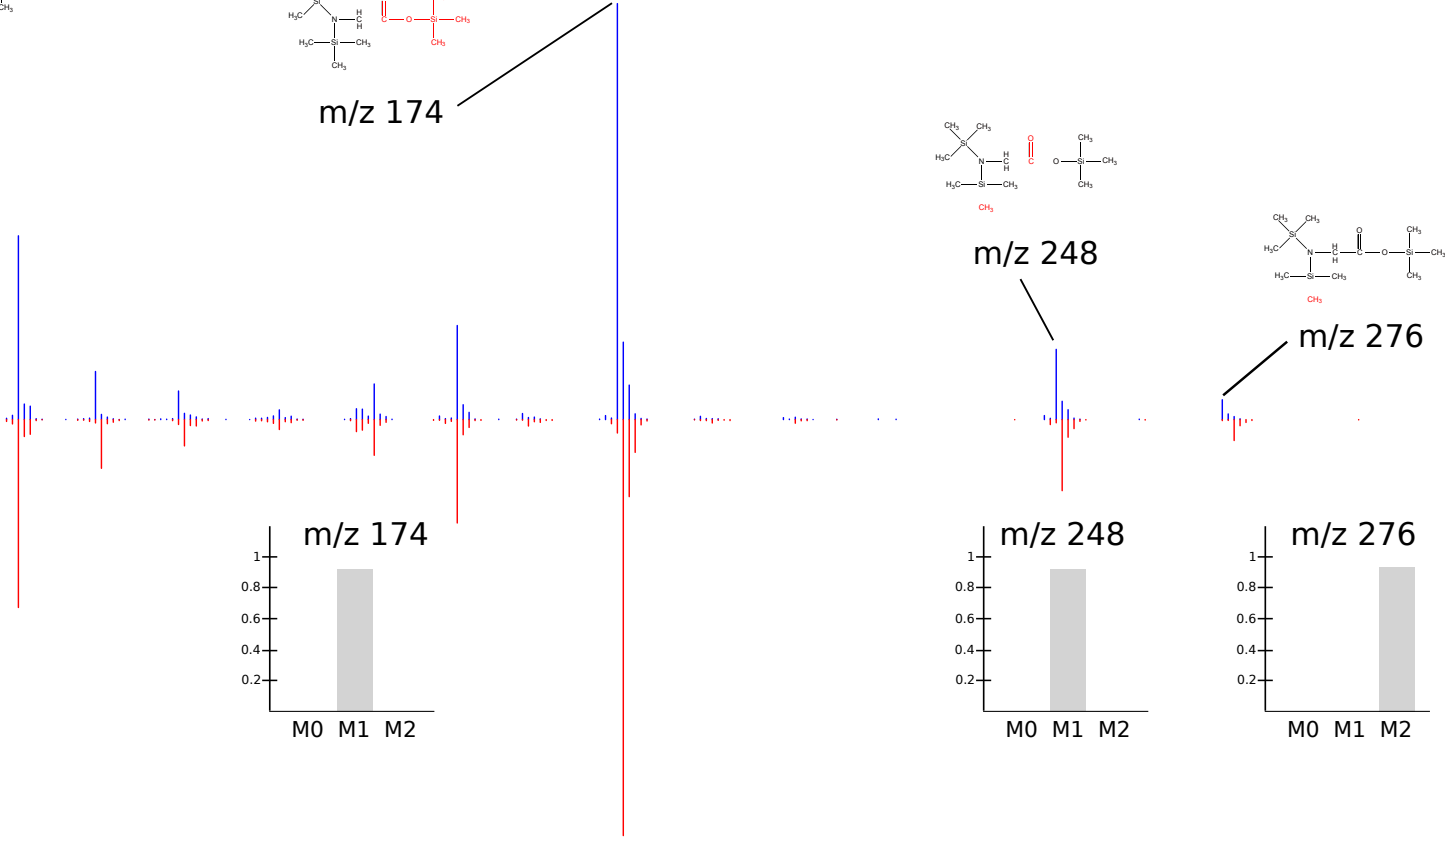

**<sup>13</sup>C<sub>2</sub> Glycine 3 TMS**

# Isoleucine 2TMS

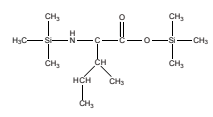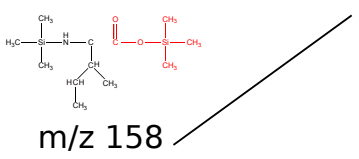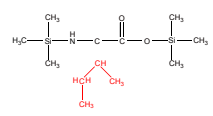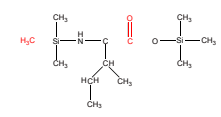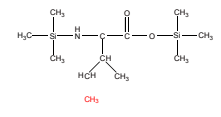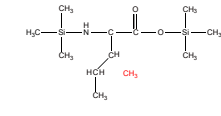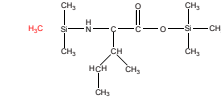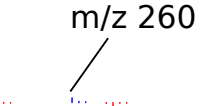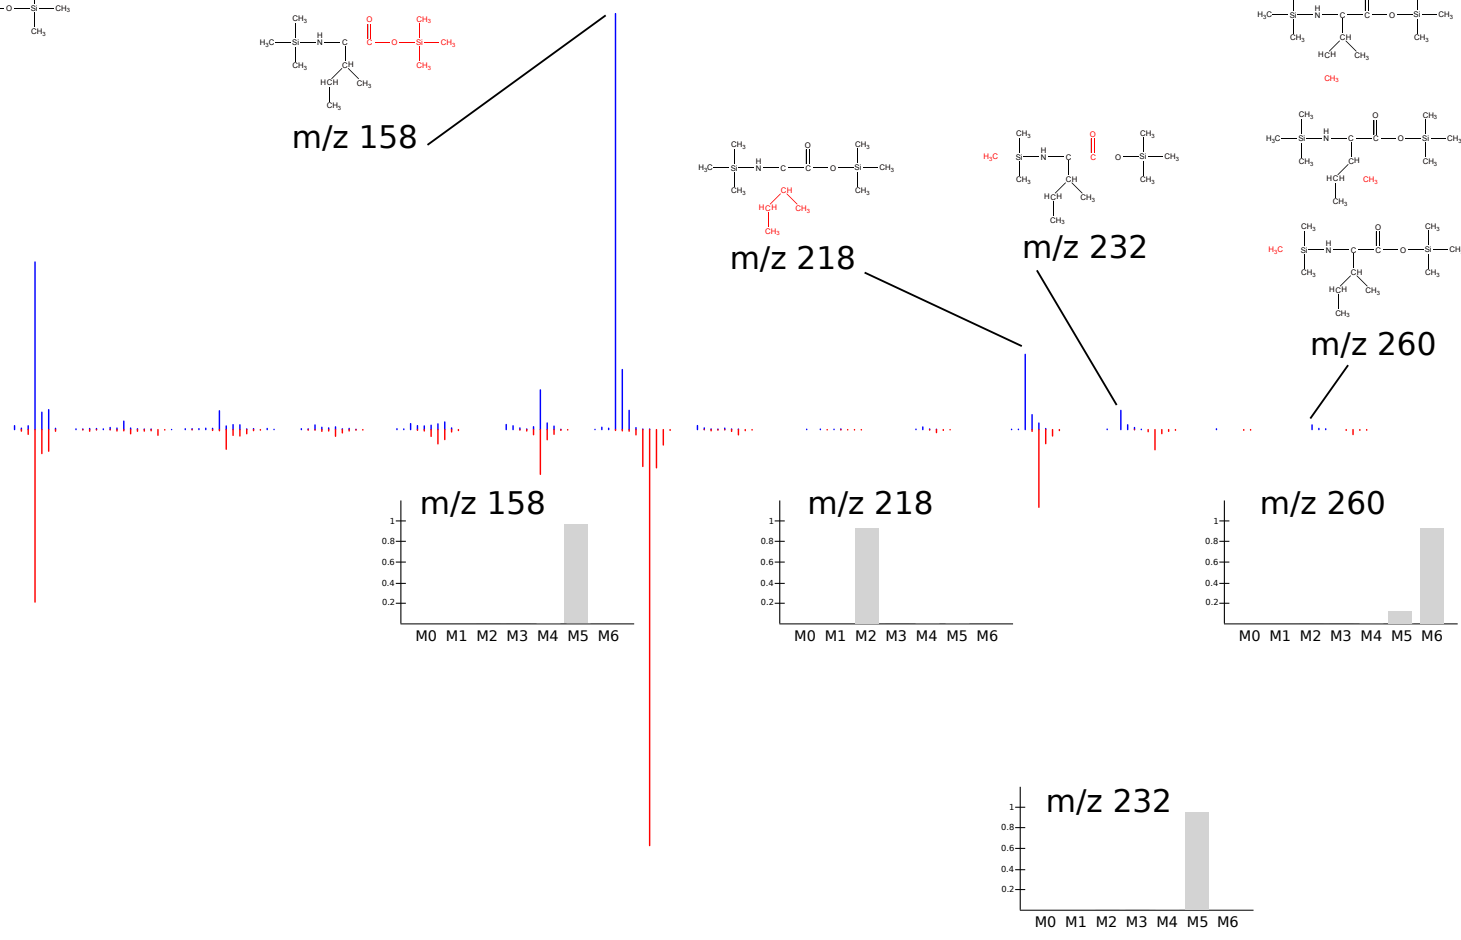

# $^{13}\text{C}_6$ Isoleucine 2TMS

# Leucine 2TMS

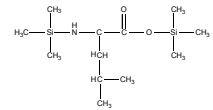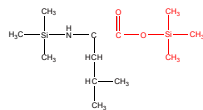

$m/z$  158

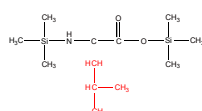

$m/z$  218

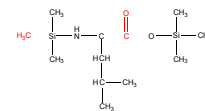

$m/z$  232

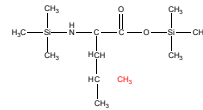

$m/z$  260

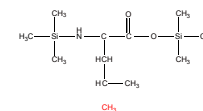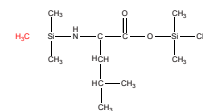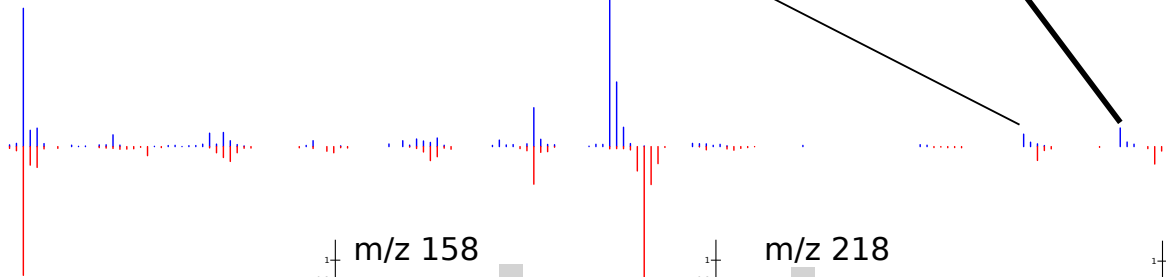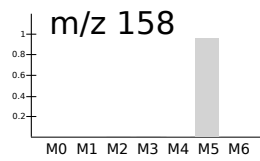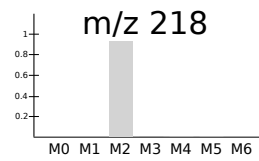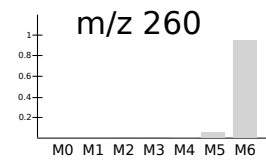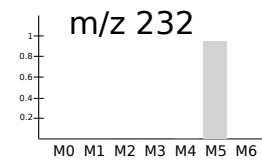

# $^{13}\text{C}_6$ Leucine 2TMS

**Lysine 3TMS**

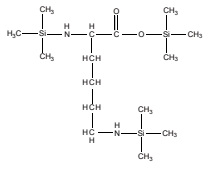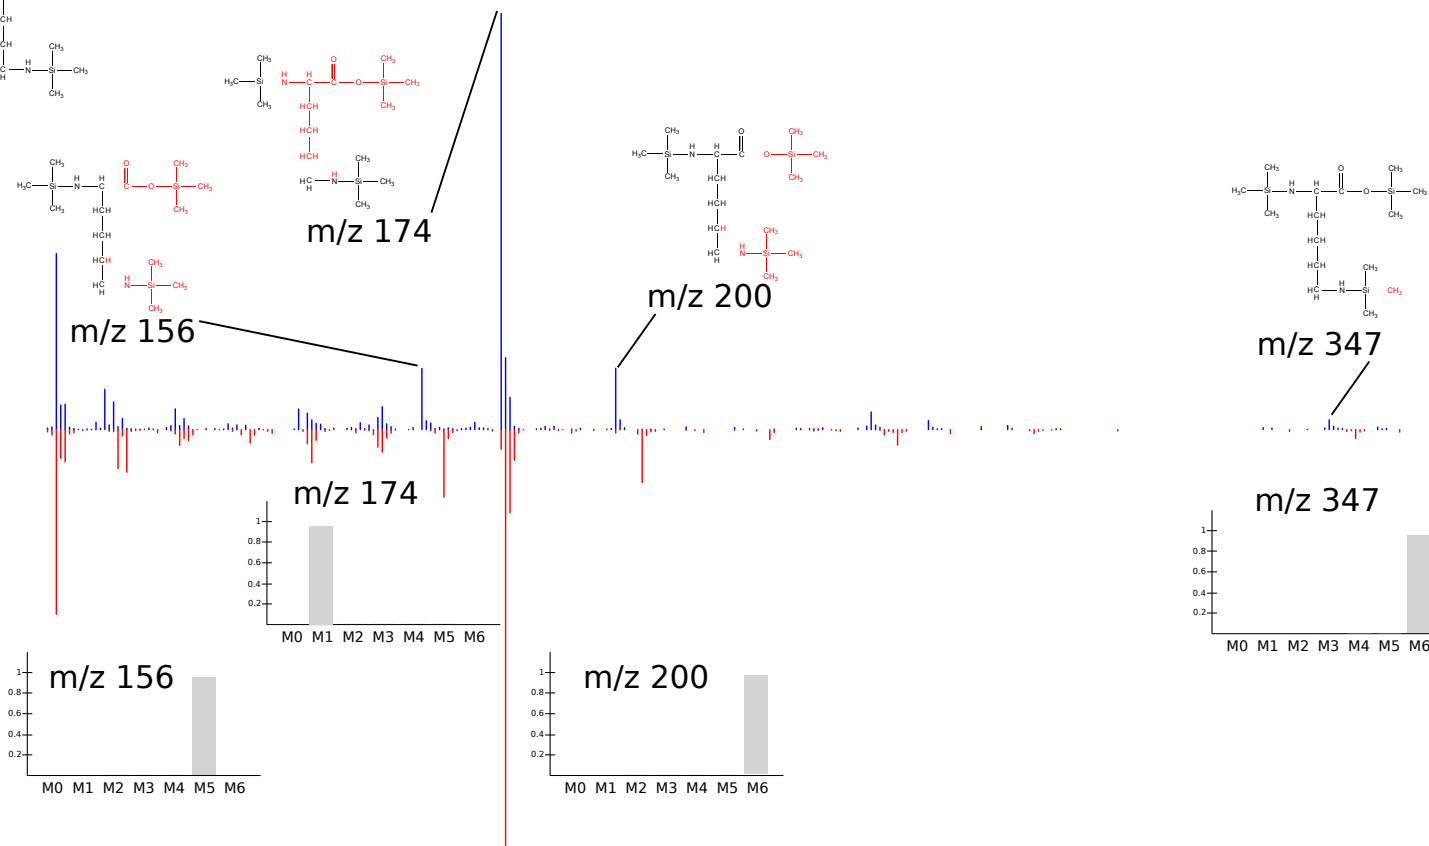

**<sup>13</sup>C<sub>6</sub> Lysine 3TMS**

# Lysine 4TMS

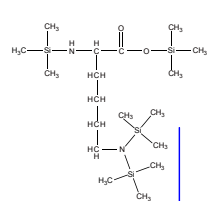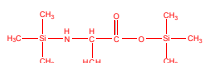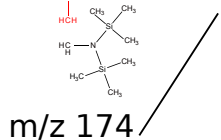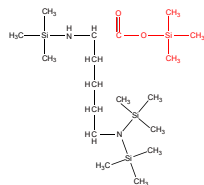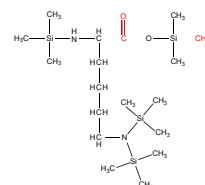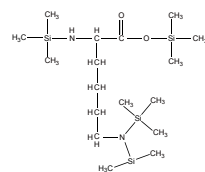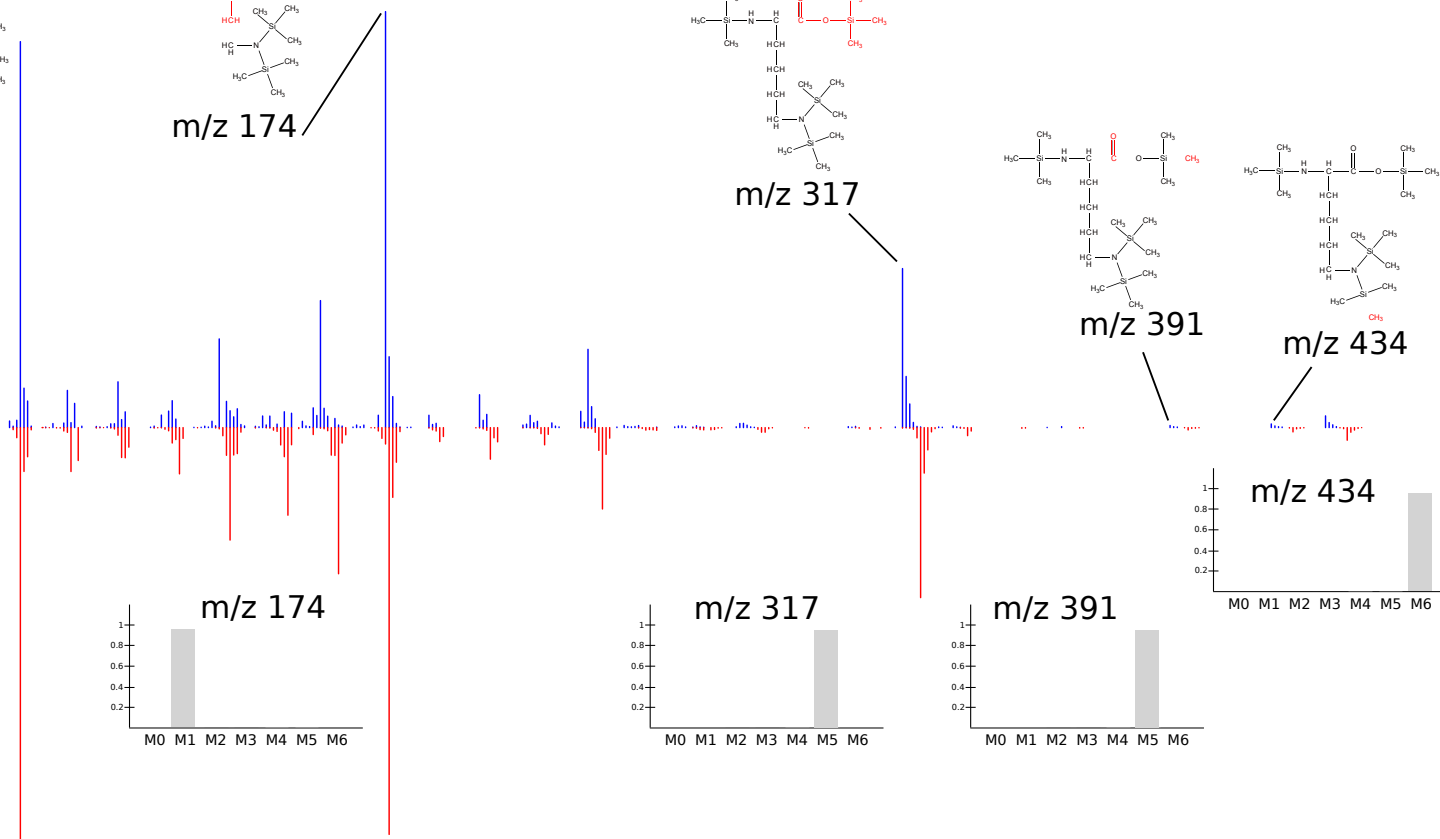

# <sup>13</sup>C<sub>6</sub> Lysine 4TMS

**Malic acid 3TMS**

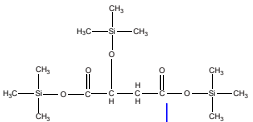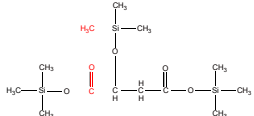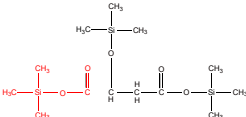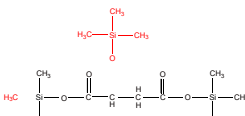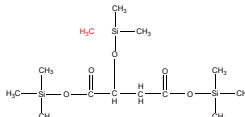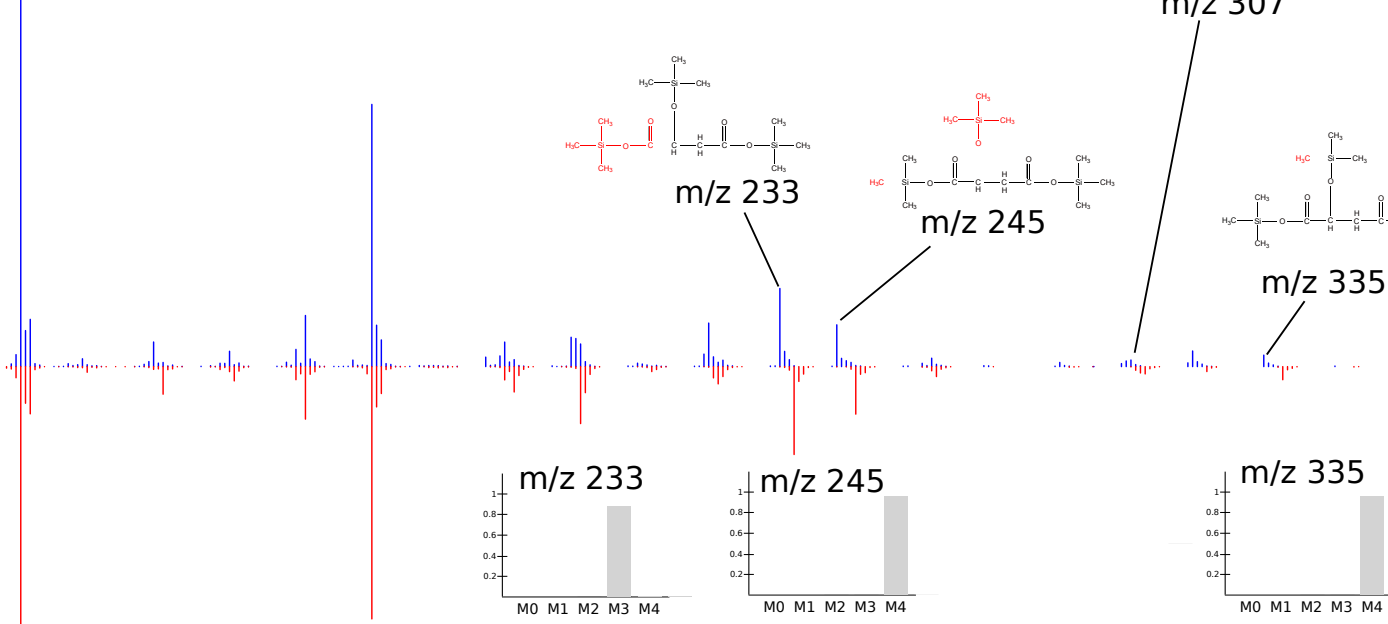

**<sup>13</sup>C<sub>4</sub> Malic acid 3TMS**

# Phenylalanine 2TMS

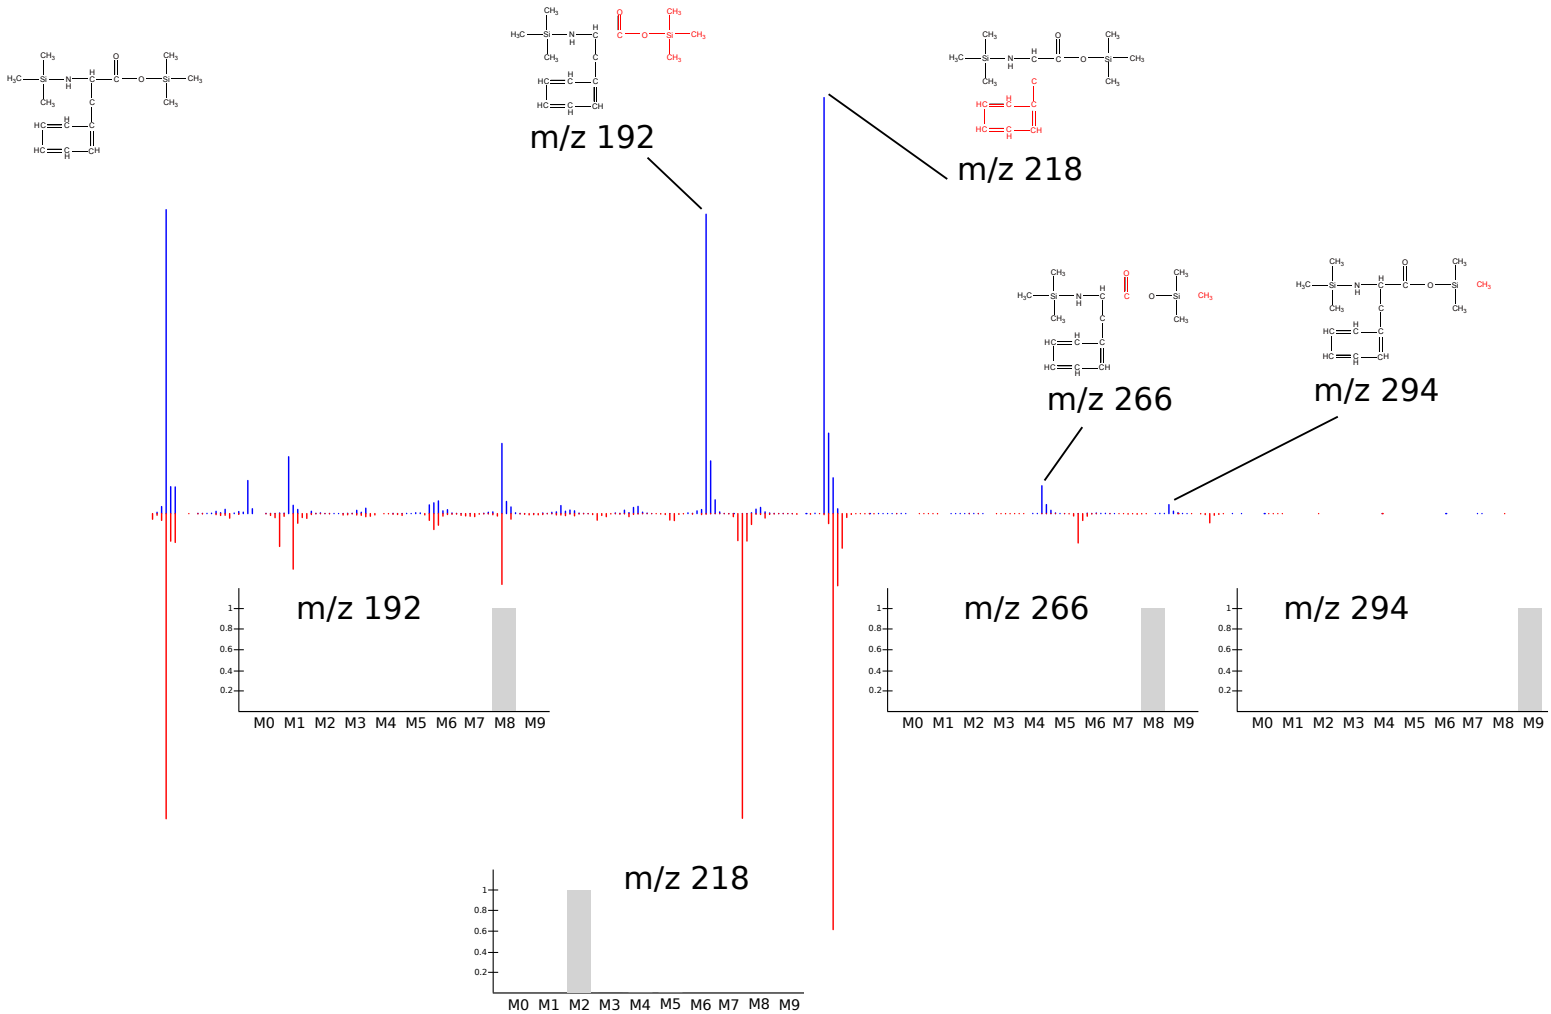

# <sup>13</sup>C<sub>9</sub> Phenylalanine 2TMS



# Proline 2TMS

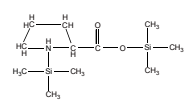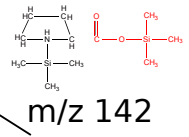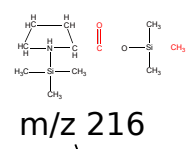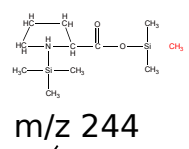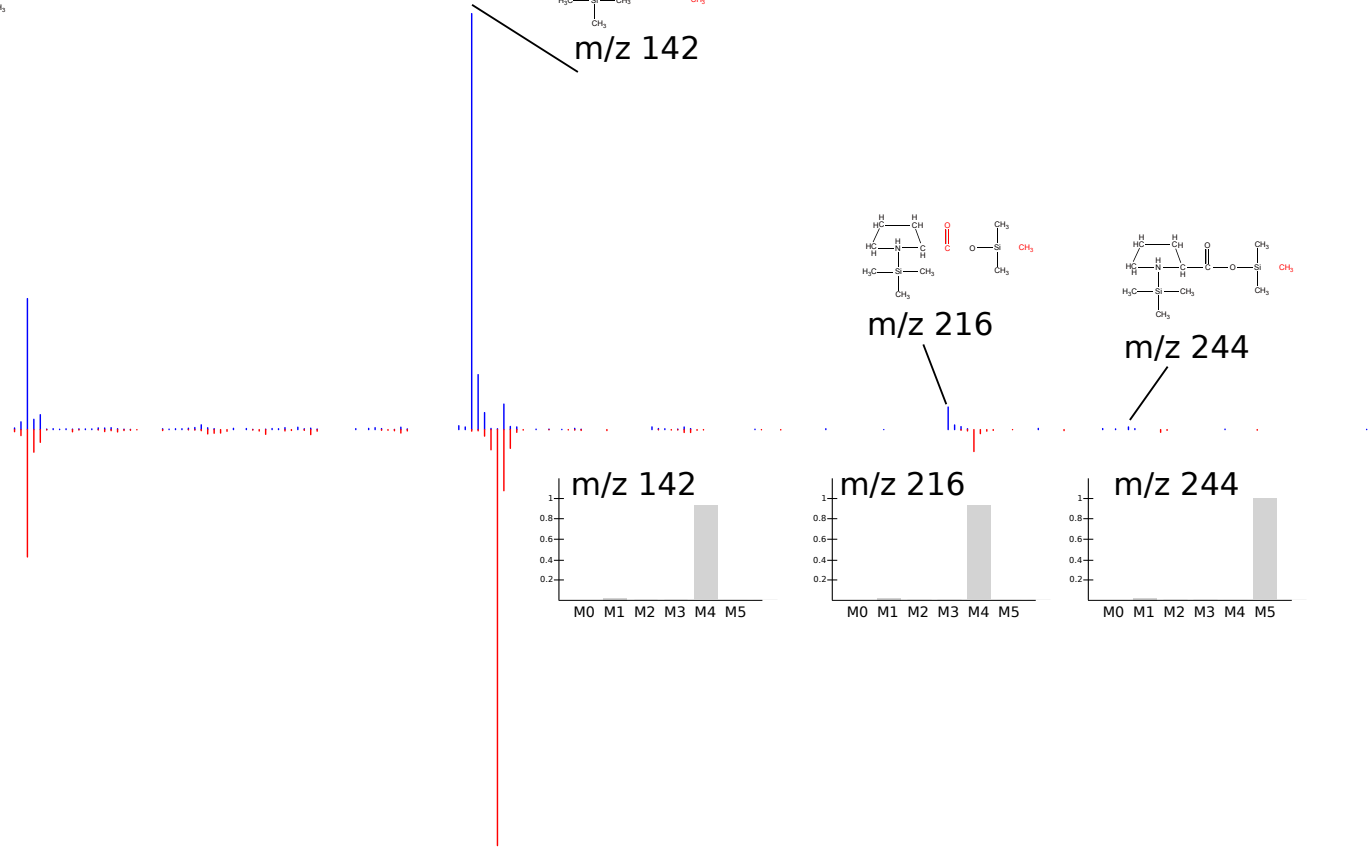

# <sup>13</sup>C<sub>5</sub> Proline 2TMS

## Pyruvic acid 1TMS 1MEOX

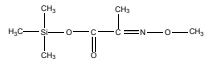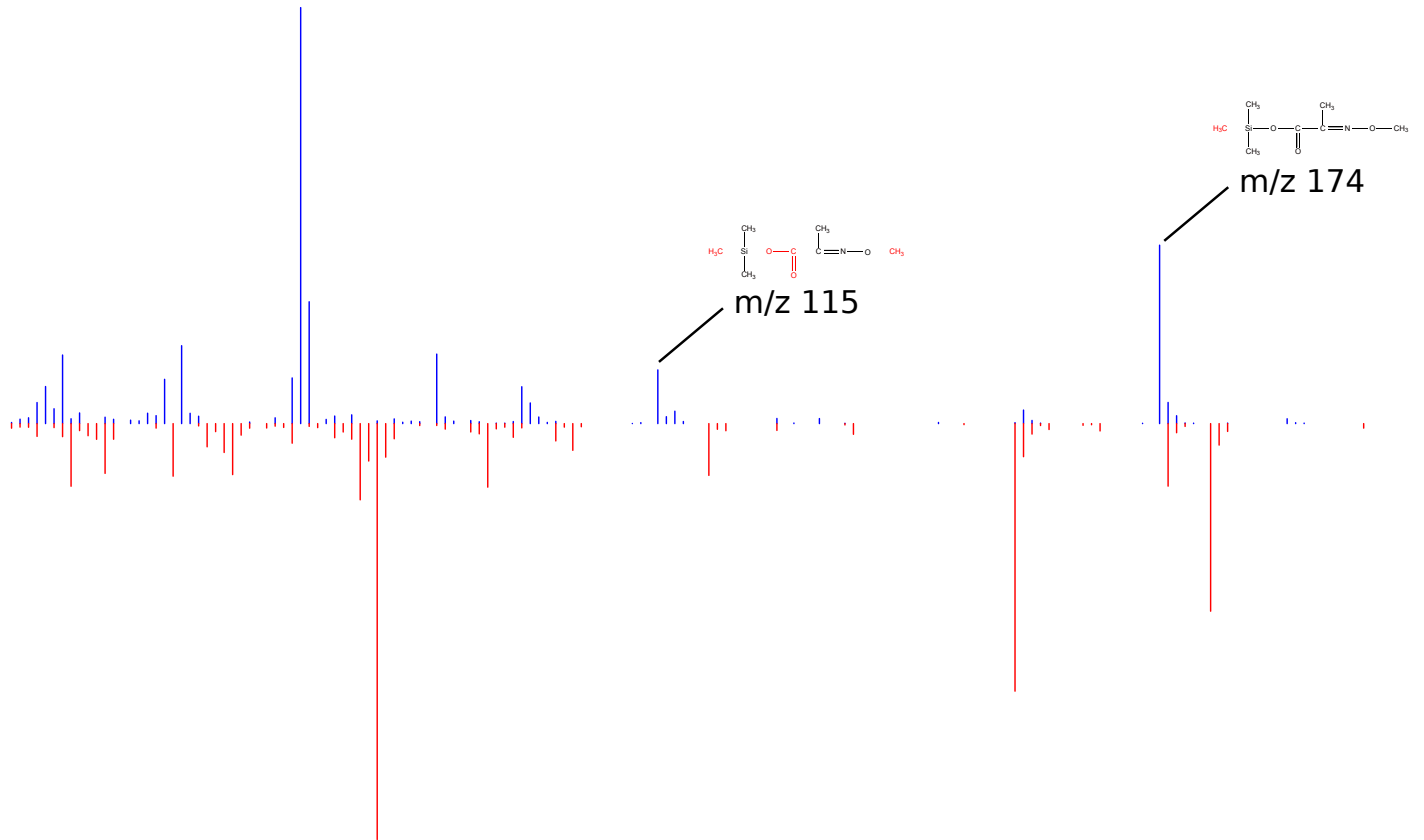

## Pyruvic acid d<sub>9</sub>-1TMS 1MEOX

**Serine 3TMS**

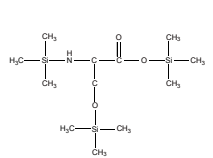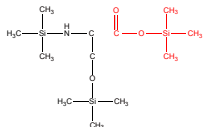

m/z 204

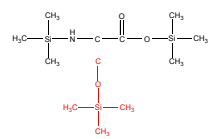

m/z 218

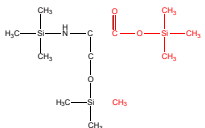

m/z 188

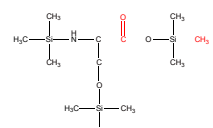

m/z 278

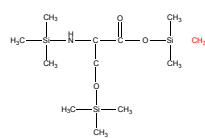

m/z 306

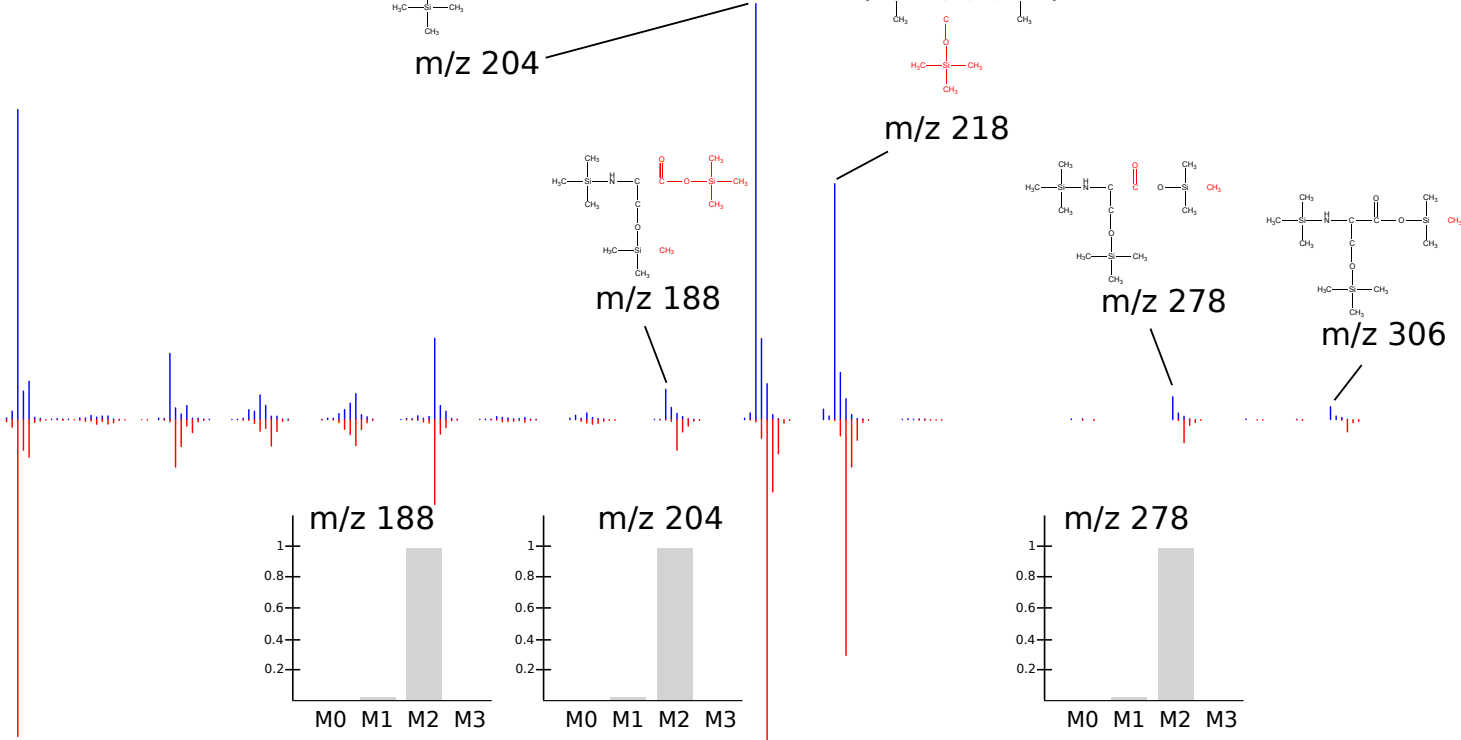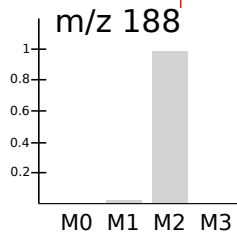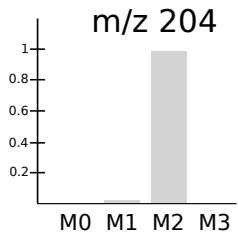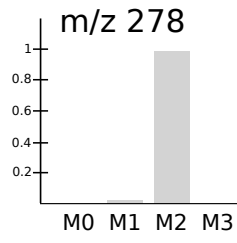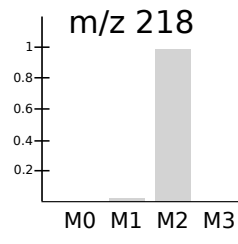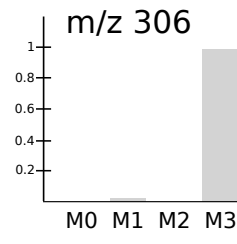

**<sup>13</sup>C<sub>3</sub> Serine 3TMS**

# Succinic acid 3TMS

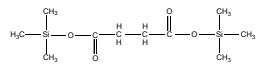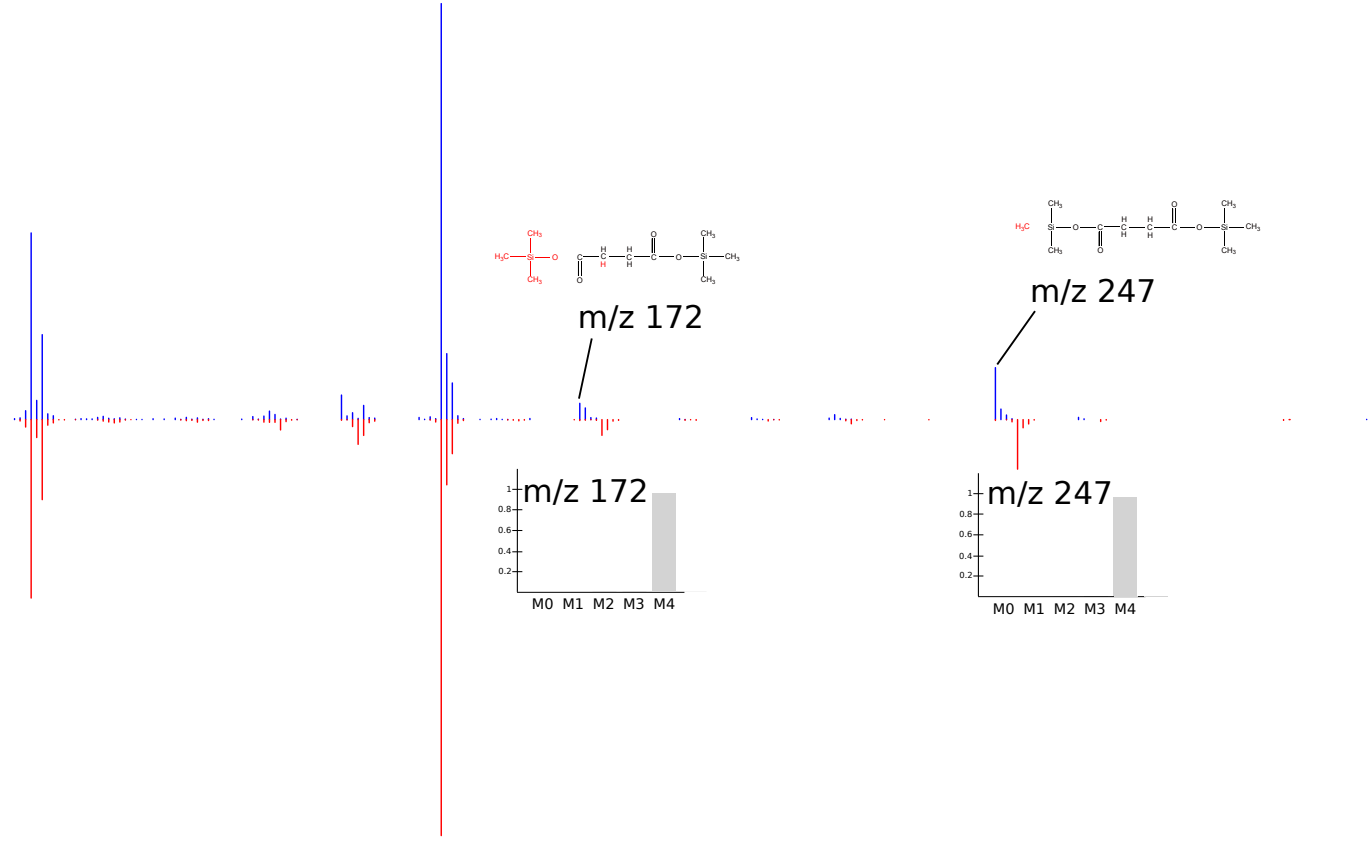

# <sup>13</sup>C<sub>4</sub> Succinic acid 3TMS

# Threonine 3TMS

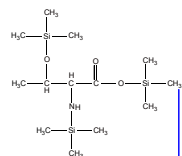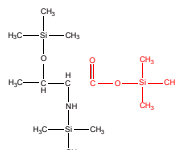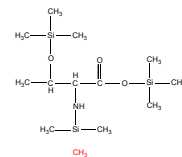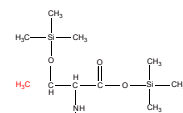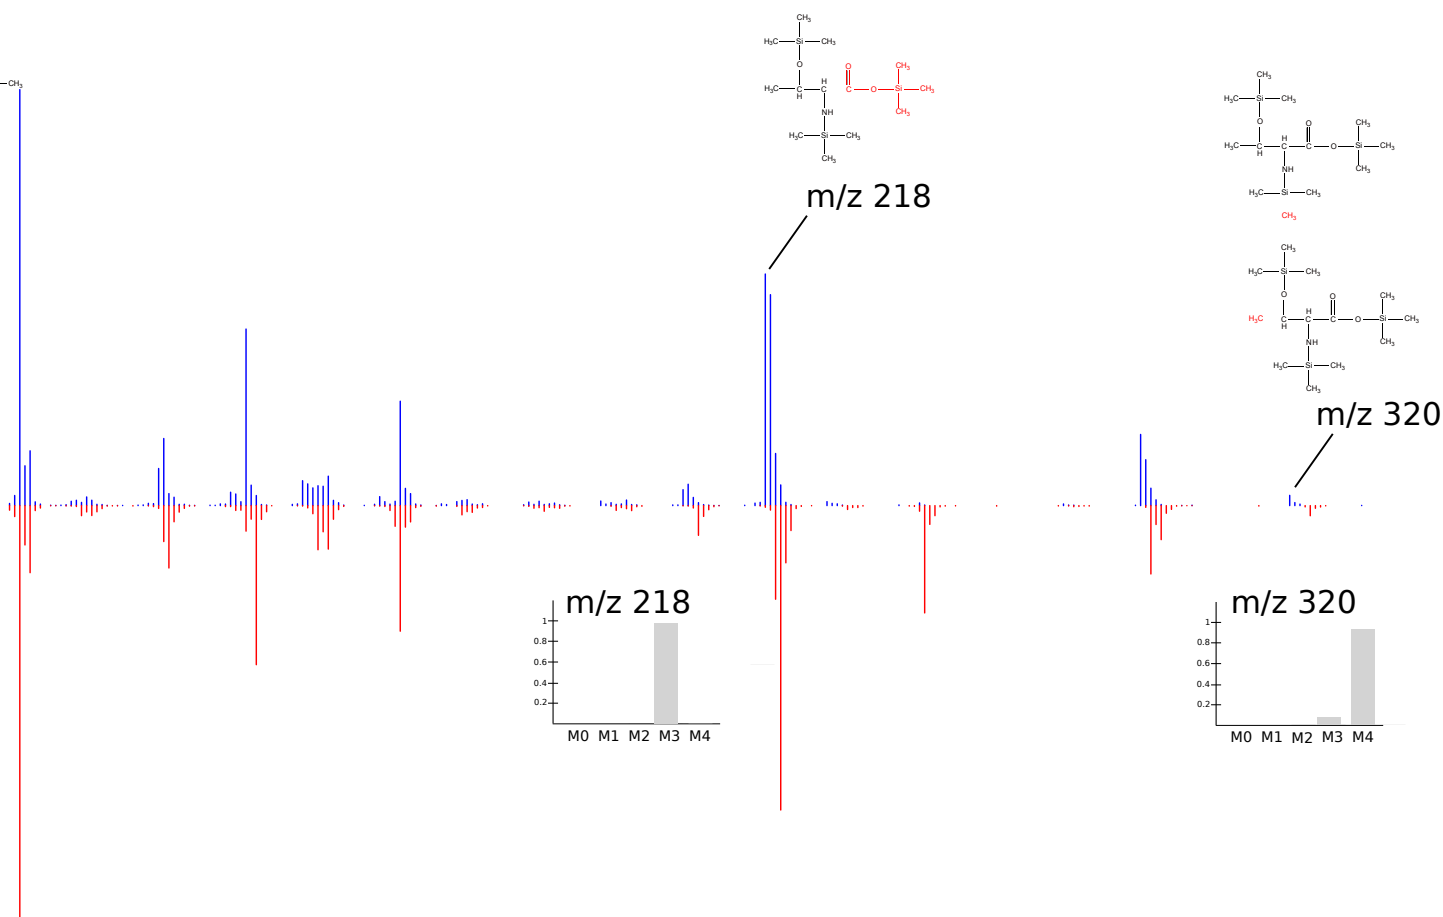

# <sup>13</sup>C<sub>4</sub>Threonine 3TMS

# Tyrosine 2TMS

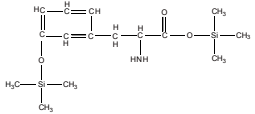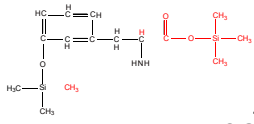

m/z 192

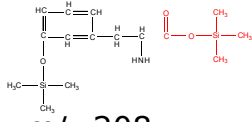

m/z 208

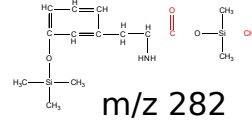

m/z 282

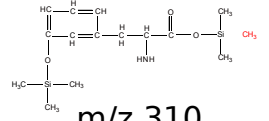

m/z 310

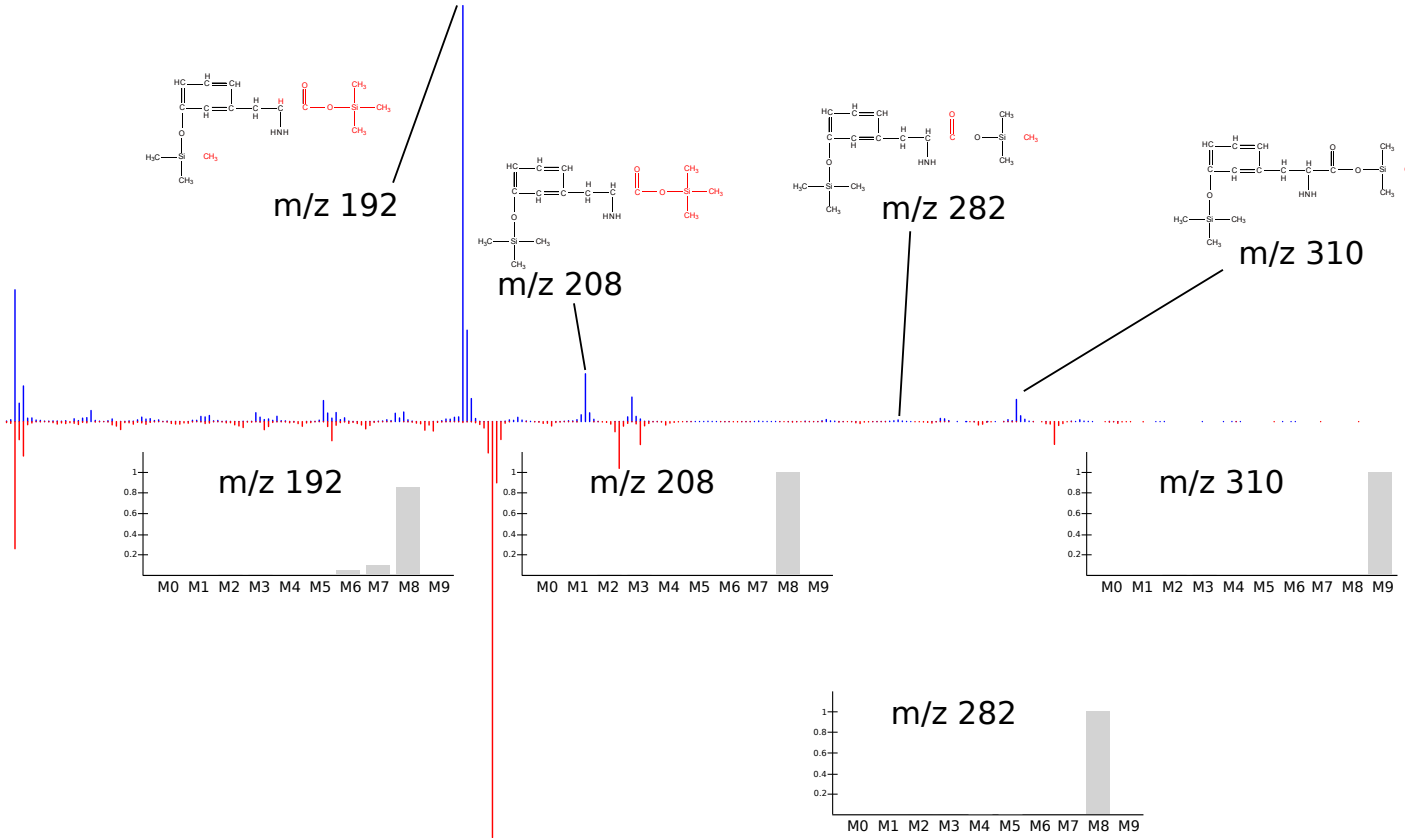

# <sup>13</sup>C<sub>9</sub> Tyrosine 2TMS

# Tyrosine 3TMS

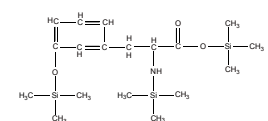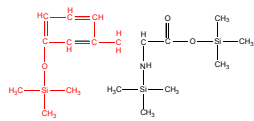

m/z 218

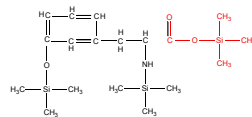

m/z 280

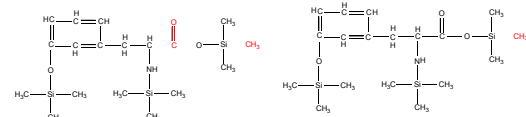

m/z 354

m/z 382

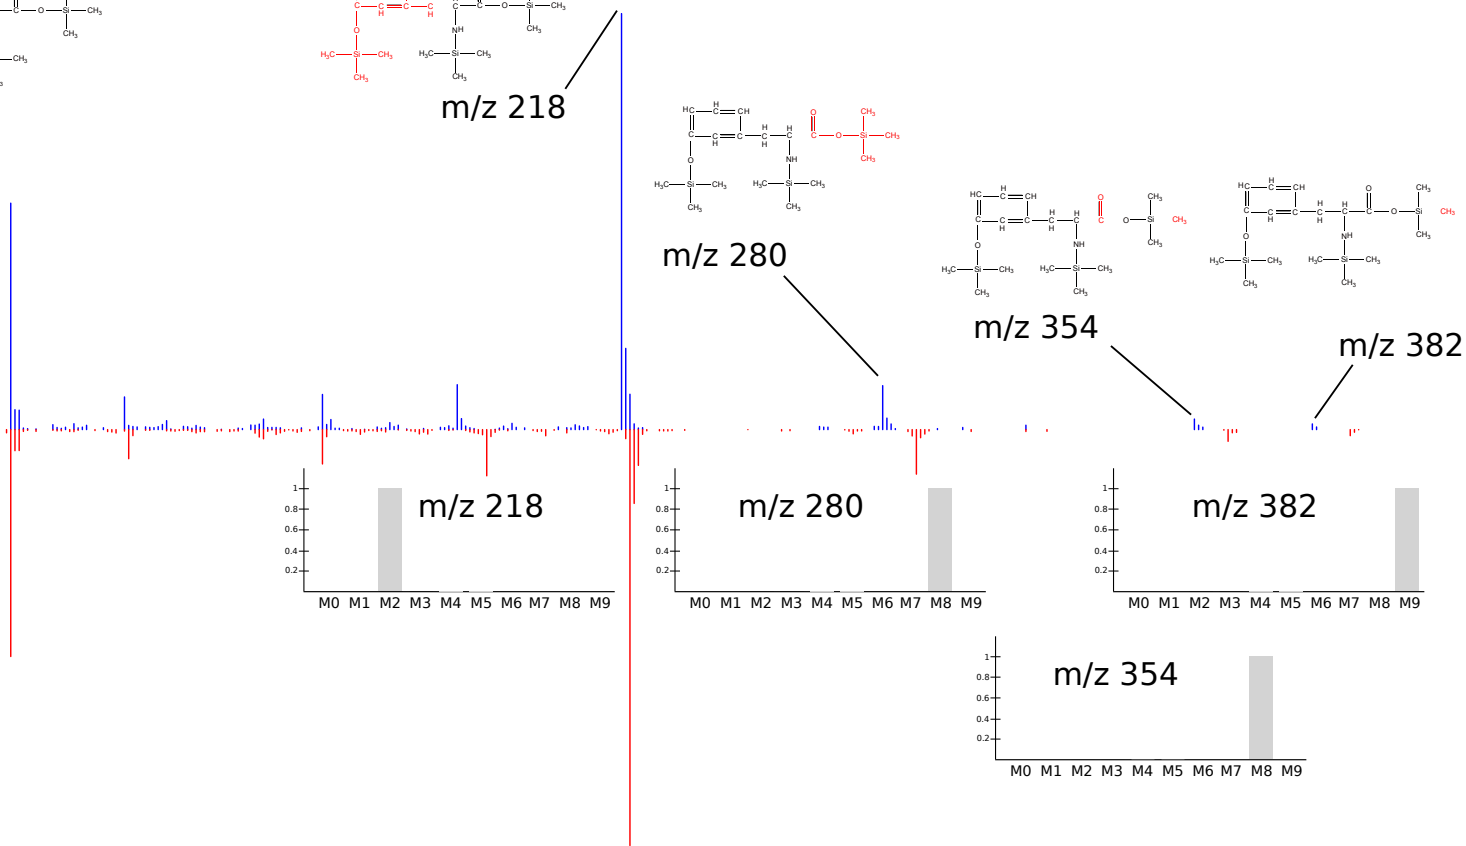

# <sup>13</sup>C<sub>9</sub> Tyrosine 3TMS

# Uracil 2TMS

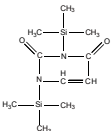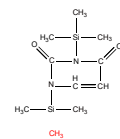

m/z 241

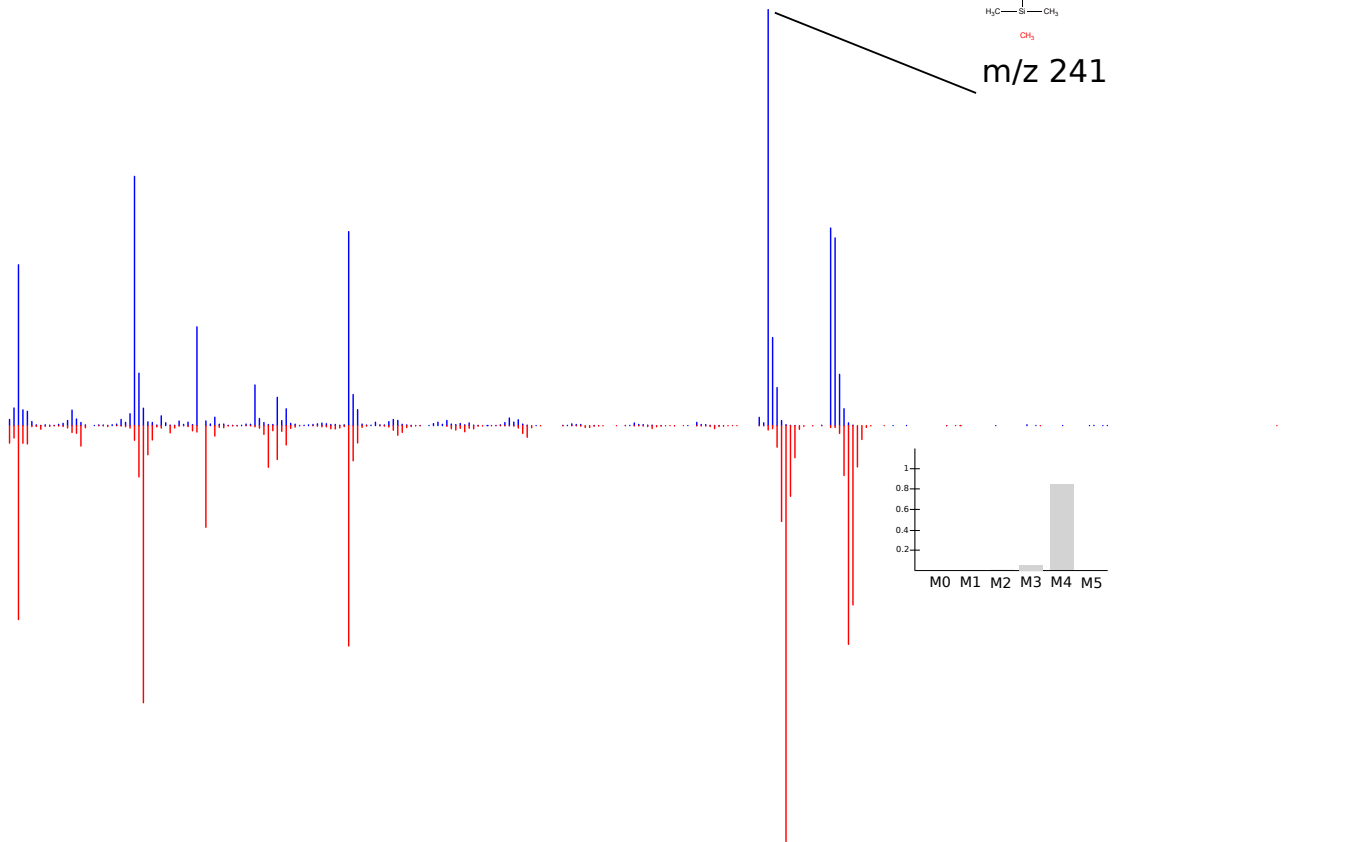

# <sup>13</sup>C<sub>4</sub> Uracil 2TMS



# Valine 2TMS

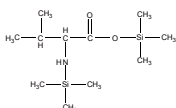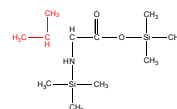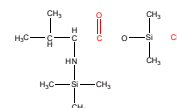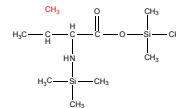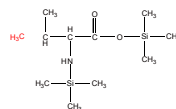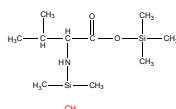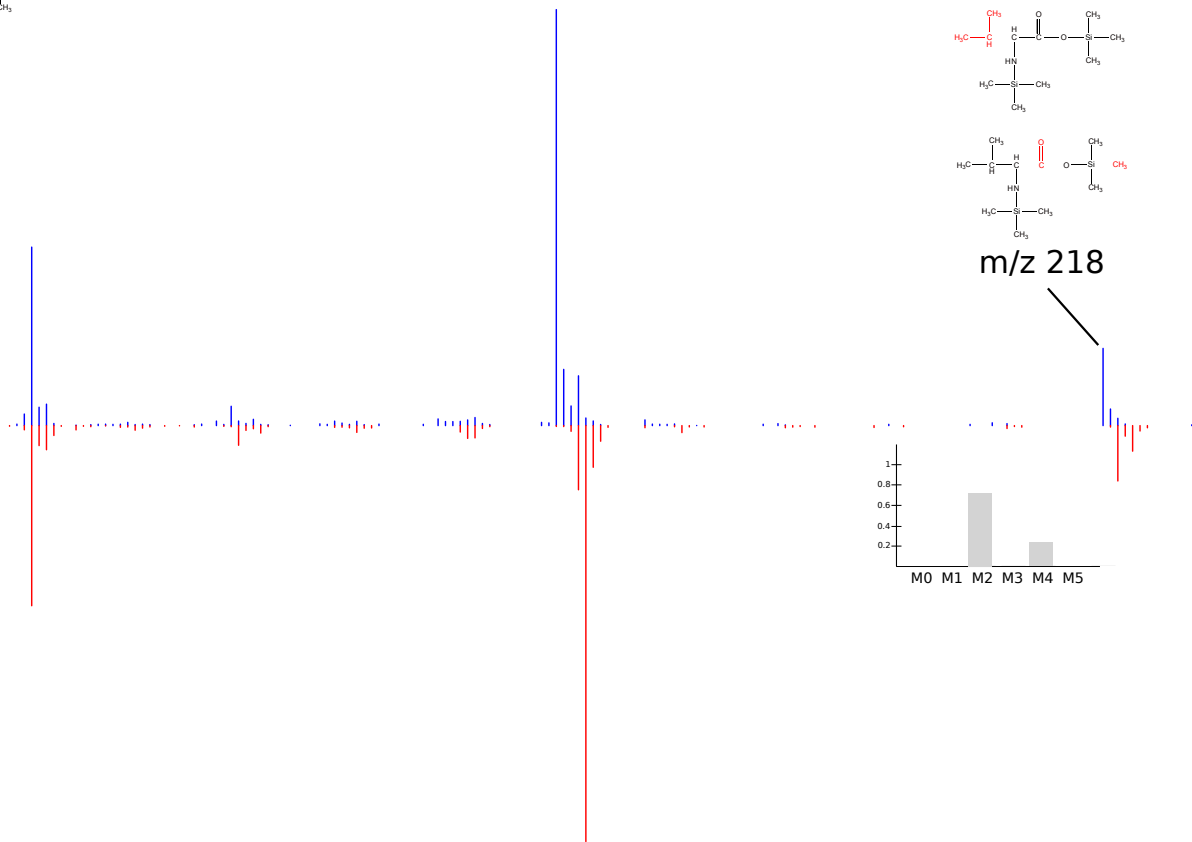

m/z 218

m/z 246

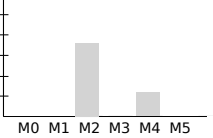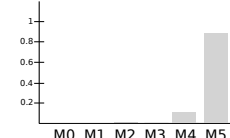

# <sup>13</sup>C<sub>5</sub> Valine 2TMS

Table 2: TBDMS Derivatized Fragment Ions

| Compound                   | m/z | m/z <sup>13</sup> C | Formula                                                                       |
|----------------------------|-----|---------------------|-------------------------------------------------------------------------------|
| Alanine 2TBDMS             | 317 | -                   | C <sub>15</sub> H <sub>35</sub> NO <sub>2</sub> Si <sub>2</sub>               |
|                            | 302 | 305,306             | C <sub>14</sub> H <sub>32</sub> NO <sub>2</sub> Si <sub>2</sub>               |
|                            | 274 | 276                 | C <sub>13</sub> H <sub>32</sub> NOSi <sub>2</sub>                             |
|                            | 260 | 263                 | C <sub>11</sub> H <sub>26</sub> NO <sub>2</sub> Si <sub>2</sub>               |
|                            | 232 | 234                 | C <sub>10</sub> H <sub>26</sub> NOSi <sub>2</sub>                             |
| Aspartic acid 3TBDMS       | 475 | -                   | C <sub>22</sub> H <sub>49</sub> NO <sub>4</sub> Si <sub>3</sub>               |
|                            | 460 | 464                 | C <sub>21</sub> H <sub>46</sub> NO <sub>4</sub> Si <sub>3</sub>               |
|                            | 418 | 422                 | C <sub>18</sub> H <sub>40</sub> NO <sub>4</sub> Si <sub>3</sub>               |
|                            | 390 | 393                 | C <sub>17</sub> H <sub>40</sub> NO <sub>3</sub> Si <sub>3</sub>               |
|                            | 376 | 378                 | C <sub>16</sub> H <sub>38</sub> NO <sub>3</sub> Si <sub>3</sub>               |
|                            | 316 | 319                 | C <sub>15</sub> H <sub>34</sub> NO <sub>2</sub> Si <sub>2</sub>               |
|                            | 302 | 304                 | C <sub>14</sub> H <sub>32</sub> NO <sub>2</sub> Si <sub>2</sub>               |
| Citric acid 4TBDMS         | 648 | -                   | C <sub>30</sub> H <sub>64</sub> O <sub>7</sub> Si <sub>4</sub>                |
|                            | 633 | 639                 | C <sub>29</sub> H <sub>61</sub> O <sub>7</sub> Si <sub>4</sub>                |
|                            | 501 | 507                 | C <sub>23</sub> H <sub>45</sub> O <sub>6</sub> Si <sub>3</sub>                |
|                            | 459 | 465                 | C <sub>20</sub> H <sub>39</sub> O <sub>6</sub> Si <sub>3</sub>                |
| Fumaric acid 2TBDMS        | 344 | -                   | C <sub>16</sub> H <sub>32</sub> O <sub>4</sub> Si <sub>2</sub>                |
|                            | 329 | 333                 | C <sub>15</sub> H <sub>29</sub> O <sub>4</sub> Si <sub>2</sub>                |
|                            | 287 | 291                 | C <sub>11</sub> H <sub>20</sub> O <sub>4</sub> Si <sub>2</sub>                |
| γ-Aminobutyric acid 2TBDMS | 331 | -                   | C <sub>16</sub> H <sub>37</sub> NO <sub>2</sub> Si <sub>2</sub>               |
|                            | 316 | 320                 | C <sub>15</sub> H <sub>34</sub> NO <sub>2</sub> Si <sub>2</sub>               |
|                            | 274 | 278                 | C <sub>12</sub> H <sub>28</sub> NO <sub>2</sub> Si <sub>2</sub>               |
| Glutamine 3TBDMS           | 488 | -                   | C <sub>23</sub> H <sub>52</sub> N <sub>2</sub> O <sub>3</sub> Si <sub>3</sub> |

*Continued on next page*

Table 2 – Continued from previous page

| Compound             | m/z | m/z <sup>13</sup> C | Formula                                                                       |
|----------------------|-----|---------------------|-------------------------------------------------------------------------------|
|                      | 473 | 478                 | C <sub>22</sub> H <sub>49</sub> N <sub>2</sub> O <sub>3</sub> Si <sub>3</sub> |
|                      | 431 | 436                 | C <sub>19</sub> H <sub>53</sub> N <sub>2</sub> O <sub>3</sub> Si <sub>3</sub> |
|                      | 357 | 362                 | C <sub>17</sub> H <sub>37</sub> N <sub>2</sub> O <sub>2</sub> Si <sub>2</sub> |
|                      | 329 | 333                 | C <sub>16</sub> H <sub>37</sub> N <sub>2</sub> OSi <sub>2</sub>               |
| Glutamic acid 3TBDMS | 489 | -                   | C <sub>23</sub> H <sub>51</sub> NO <sub>4</sub> Si <sub>3</sub>               |
|                      | 474 | 479                 | C <sub>22</sub> H <sub>48</sub> NO <sub>4</sub> Si <sub>3</sub>               |
|                      | 432 | 437                 | C <sub>19</sub> H <sub>42</sub> NO <sub>4</sub> Si <sub>3</sub>               |
|                      | 358 | 363                 | C <sub>17</sub> H <sub>36</sub> NO <sub>3</sub> Si <sub>2</sub>               |
|                      | 330 | 334                 | C <sub>16</sub> H <sub>36</sub> NO <sub>2</sub> Si <sub>2</sub>               |
|                      | 272 | 276                 | C <sub>12</sub> H <sub>26</sub> NO <sub>2</sub> Si <sub>2</sub>               |
| Histidine 3TBDMS     | 497 | -                   | C <sub>24</sub> H <sub>51</sub> N <sub>3</sub> O <sub>2</sub> Si <sub>3</sub> |
|                      | 482 | 488                 | C <sub>23</sub> H <sub>48</sub> N <sub>3</sub> O <sub>2</sub> Si <sub>3</sub> |
|                      | 440 | 446                 | C <sub>20</sub> H <sub>42</sub> N <sub>3</sub> O <sub>2</sub> Si <sub>3</sub> |
|                      | 412 | 417                 | C <sub>19</sub> H <sub>42</sub> N <sub>3</sub> OSi <sub>3</sub>               |
|                      | 280 | 285                 | C <sub>14</sub> H <sub>28</sub> N <sub>2</sub> Si <sub>2</sub>                |
| Isoleucine 2TBDMS    | 359 | -                   | C <sub>18</sub> H <sub>41</sub> NO <sub>2</sub> Si <sub>2</sub>               |
|                      | 302 | 304,308             | C <sub>14</sub> H <sub>32</sub> NO <sub>2</sub> Si <sub>2</sub>               |
|                      | 274 | 279                 | C <sub>13</sub> H <sub>32</sub> NOSi <sub>2</sub>                             |
|                      | 200 | 205                 | C <sub>11</sub> H <sub>26</sub> NSi                                           |
| Leucine 2TBDMS       | 359 | -                   | C <sub>18</sub> H <sub>41</sub> NO <sub>2</sub> Si <sub>2</sub>               |
|                      | 302 | 304,308             | C <sub>14</sub> H <sub>32</sub> NO <sub>2</sub> Si <sub>2</sub>               |
|                      | 274 | 279                 | C <sub>13</sub> H <sub>32</sub> NOSi <sub>2</sub>                             |
|                      | 200 | 205                 | C <sub>11</sub> H <sub>26</sub> NSi                                           |
| Lysine 3TBDMS        | 488 | -                   | C <sub>24</sub> H <sub>56</sub> N <sub>2</sub> O <sub>2</sub> Si <sub>3</sub> |

Continued on next page

Table 2 – Continued from previous page

| Compound             | m/z | m/z <sup>13</sup> C | Formula                                                                       |
|----------------------|-----|---------------------|-------------------------------------------------------------------------------|
|                      | 473 | 479                 | C <sub>23</sub> H <sub>53</sub> N <sub>2</sub> O <sub>2</sub> Si <sub>3</sub> |
|                      | 431 | 437                 | C <sub>20</sub> H <sub>47</sub> N <sub>2</sub> O <sub>2</sub> Si <sub>3</sub> |
|                      | 329 | 334                 | C <sub>17</sub> H <sub>41</sub> N <sub>2</sub> Si <sub>2</sub>                |
| Malic acid 3TBDMS    | 476 | -                   | C <sub>22</sub> H <sub>48</sub> O <sub>5</sub> Si <sub>3</sub>                |
|                      | 461 | 465                 | C <sub>21</sub> H <sub>45</sub> O <sub>5</sub> Si <sub>3</sub>                |
|                      | 419 | 423                 | C <sub>18</sub> H <sub>39</sub> O <sub>5</sub> Si <sub>3</sub>                |
|                      | 391 | 394                 | C <sub>17</sub> H <sub>39</sub> O <sub>4</sub> Si <sub>3</sub>                |
|                      | 375 | 378                 | C <sub>17</sub> H <sub>39</sub> O <sub>3</sub> Si <sub>3</sub>                |
|                      | 287 | 291                 | C <sub>12</sub> H <sub>23</sub> O <sub>4</sub> Si <sub>2</sub>                |
| Ornithine 3TBDMS     | 474 | -                   | C <sub>23</sub> H <sub>54</sub> N <sub>2</sub> O <sub>2</sub> Si <sub>3</sub> |
|                      | 459 | 464                 | C <sub>22</sub> H <sub>51</sub> N <sub>2</sub> O <sub>2</sub> Si <sub>3</sub> |
|                      | 417 | 422                 | C <sub>19</sub> H <sub>45</sub> N <sub>2</sub> O <sub>2</sub> Si <sub>3</sub> |
| Serine 3TBDMS        | 447 | -                   | C <sub>21</sub> H <sub>49</sub> NO <sub>3</sub> Si <sub>3</sub>               |
|                      | 432 | 435                 | C <sub>20</sub> H <sub>46</sub> NO <sub>3</sub> Si <sub>3</sub>               |
|                      | 404 | 406                 | C <sub>19</sub> H <sub>46</sub> NO <sub>2</sub> Si <sub>3</sub>               |
|                      | 390 | 393                 | C <sub>17</sub> H <sub>40</sub> NO <sub>3</sub> Si <sub>3</sub>               |
|                      | 362 | 364                 | C <sub>16</sub> H <sub>40</sub> NO <sub>2</sub> Si <sub>3</sub>               |
|                      | 302 | 304                 | C <sub>14</sub> H <sub>32</sub> NO <sub>2</sub> Si <sub>2</sub>               |
|                      | 288 | 290                 | C <sub>14</sub> H <sub>34</sub> NOSi <sub>2</sub>                             |
|                      | 230 | 232                 | C <sub>10</sub> H <sub>24</sub> NOSi <sub>2</sub>                             |
| Succinic acid 2TBDMS | 346 | -                   | C <sub>16</sub> H <sub>34</sub> O <sub>4</sub> Si <sub>2</sub>                |
|                      | 331 | 335                 | C <sub>15</sub> H <sub>31</sub> O <sub>4</sub> Si <sub>2</sub>                |
|                      | 289 | 293                 | C <sub>12</sub> H <sub>25</sub> O <sub>4</sub> Si <sub>2</sub>                |
|                      | 215 | 219                 | C <sub>10</sub> H <sub>19</sub> O <sub>3</sub> Si                             |

Continued on next page

Table 2 – *Continued from previous page*

| <b>Compound</b> | <b>m/z</b> | <b>m/z <sup>13</sup>C</b> | <b>Formula</b>                                                  |
|-----------------|------------|---------------------------|-----------------------------------------------------------------|
| Tyrosine 3TBDMS | 523        | -                         | C <sub>27</sub> H <sub>53</sub> NO <sub>3</sub> Si <sub>3</sub> |
|                 | 508        | 517                       | C <sub>26</sub> H <sub>50</sub> NO <sub>3</sub> Si <sub>3</sub> |
|                 | 466        | 475                       | C <sub>23</sub> H <sub>44</sub> NO <sub>3</sub> Si <sub>3</sub> |
|                 | 438        | 346                       | C <sub>22</sub> H <sub>44</sub> NO <sub>2</sub> Si <sub>3</sub> |
|                 | 364        | 372                       | C <sub>20</sub> H <sub>38</sub> NOSi <sub>2</sub>               |
|                 | 302        | 304                       | C <sub>14</sub> H <sub>32</sub> NO <sub>2</sub> Si <sub>2</sub> |
| Valine 2TBDMS   | 345        | -                         | C <sub>17</sub> H <sub>39</sub> NO <sub>2</sub> Si <sub>2</sub> |
|                 | 302        | 304, 306                  | C <sub>14</sub> H <sub>32</sub> NO <sub>2</sub> Si <sub>2</sub> |
|                 | 288        | 293                       | C <sub>13</sub> H <sub>30</sub> NO <sub>2</sub> Si <sub>2</sub> |
|                 | 260        | 264                       | C <sub>12</sub> H <sub>30</sub> NOSi <sub>2</sub>               |

## Alanine 2TBDMS

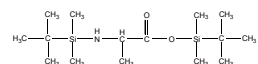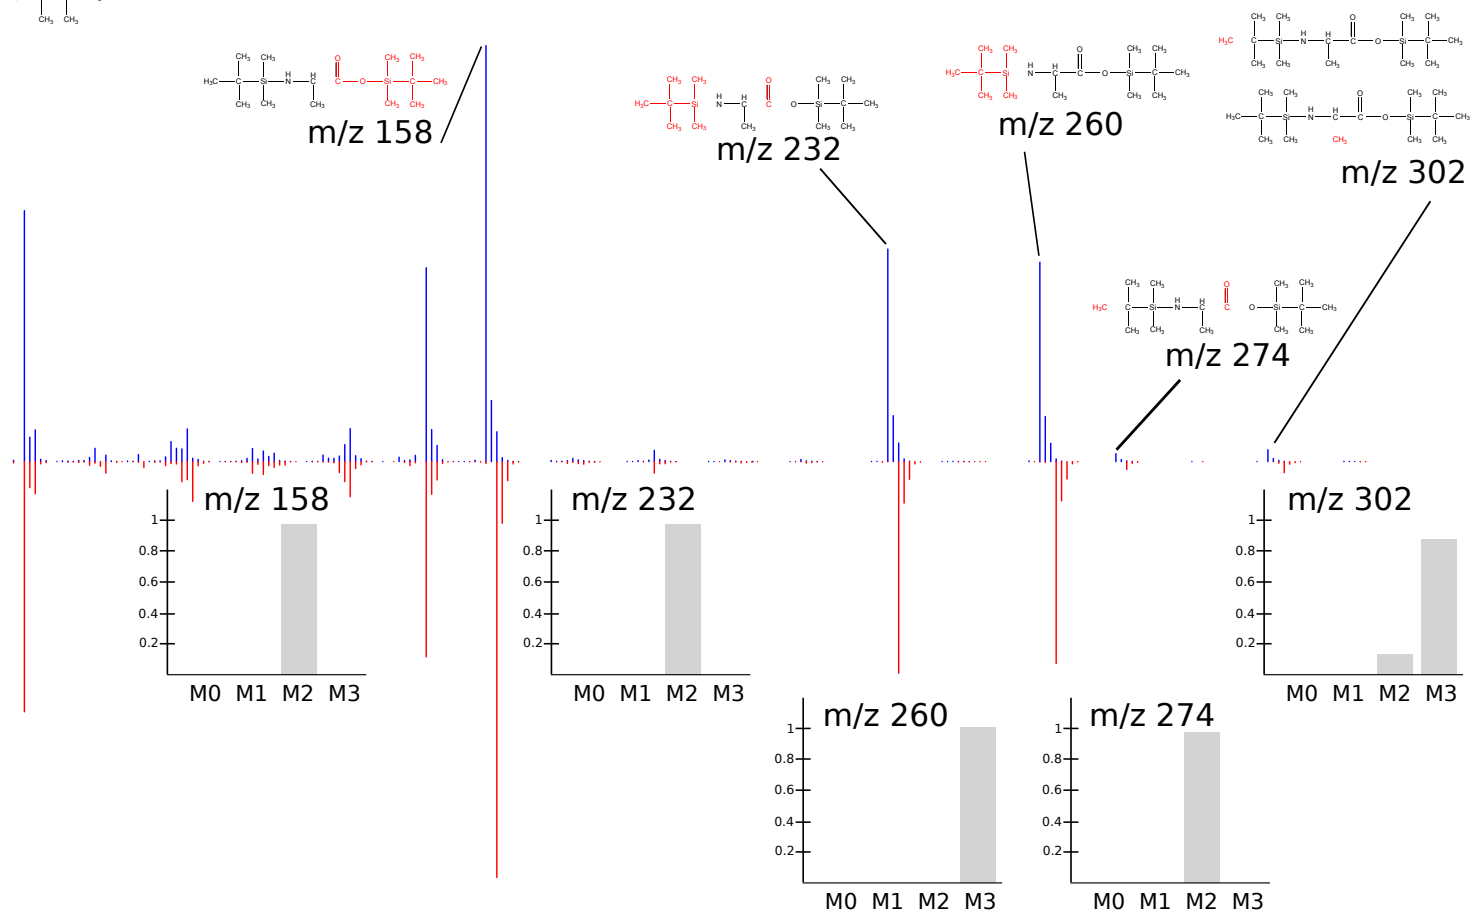

## <sup>13</sup>C<sub>3</sub> Alanine 2TBDMS

# Aspartic acid 3TBDMS

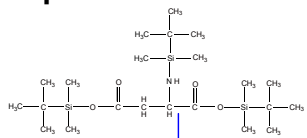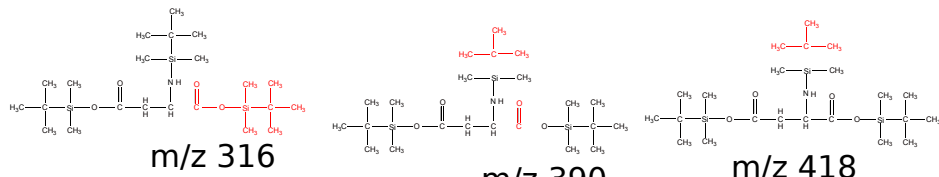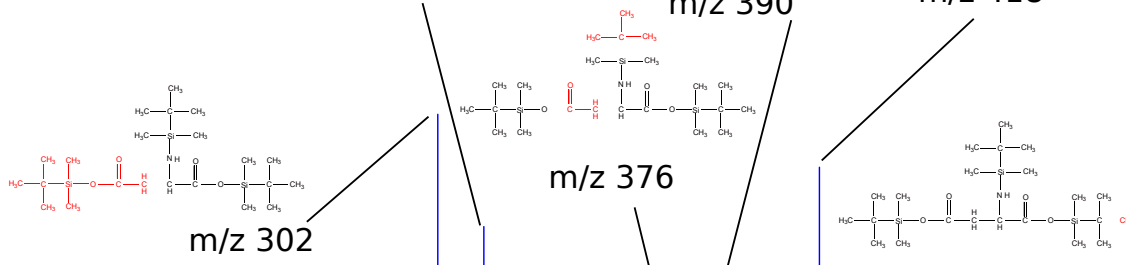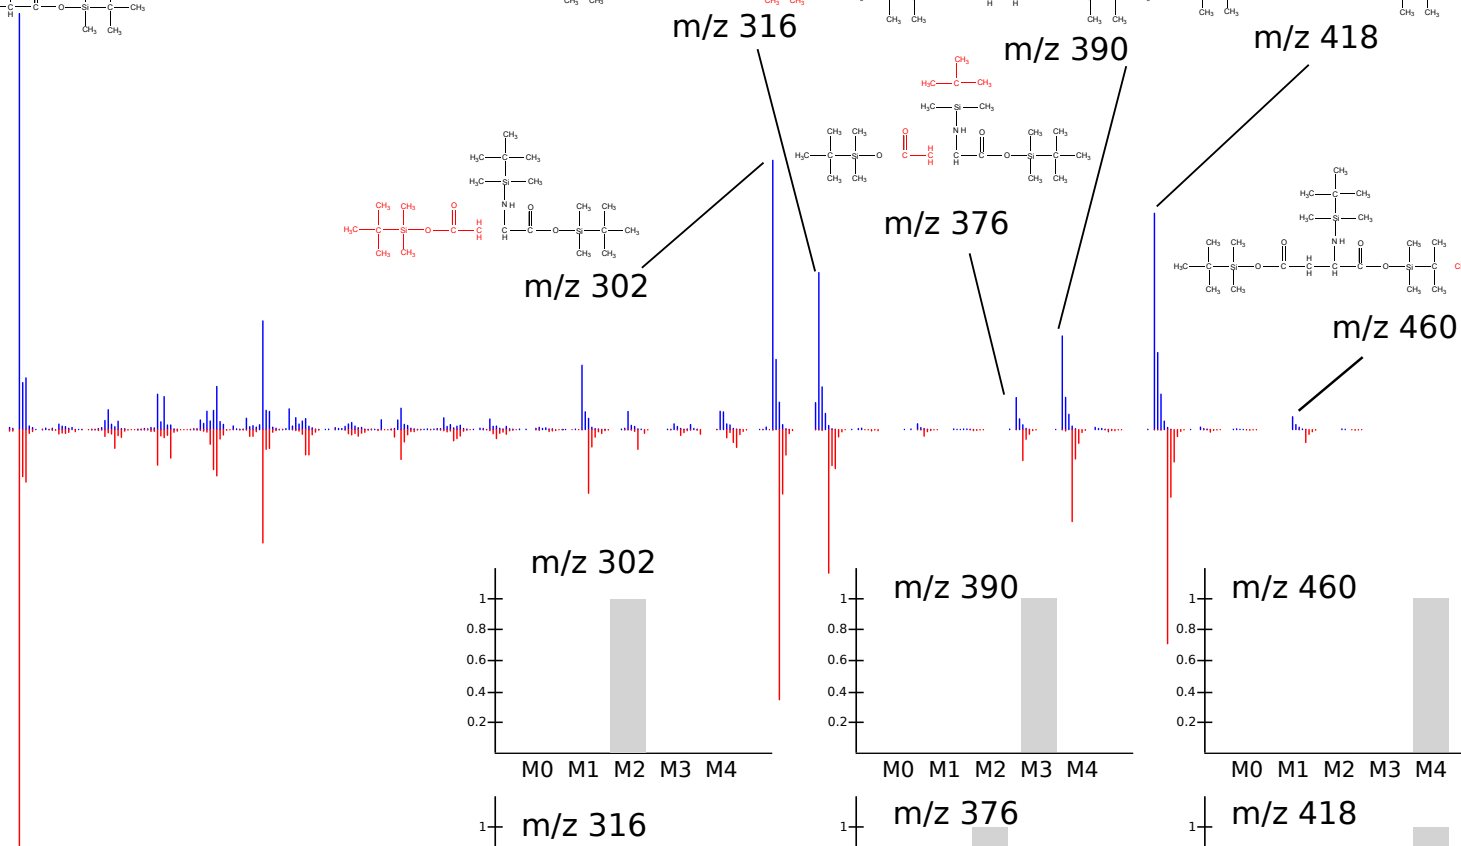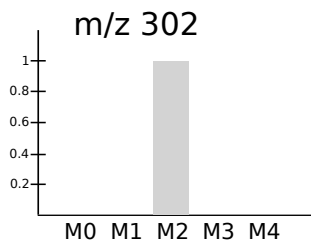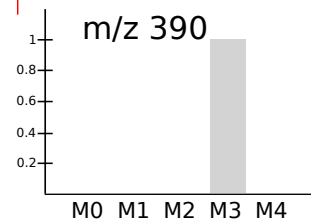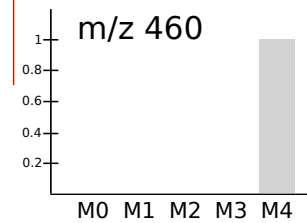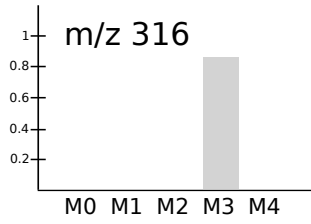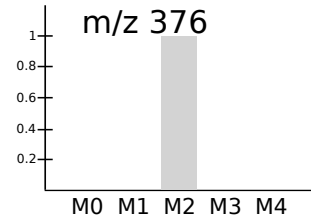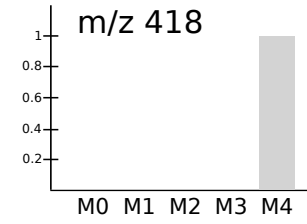

# <sup>13</sup>C<sub>4</sub> Aspartic acid 3TBDMS

**Citric acid 4TBDMS**

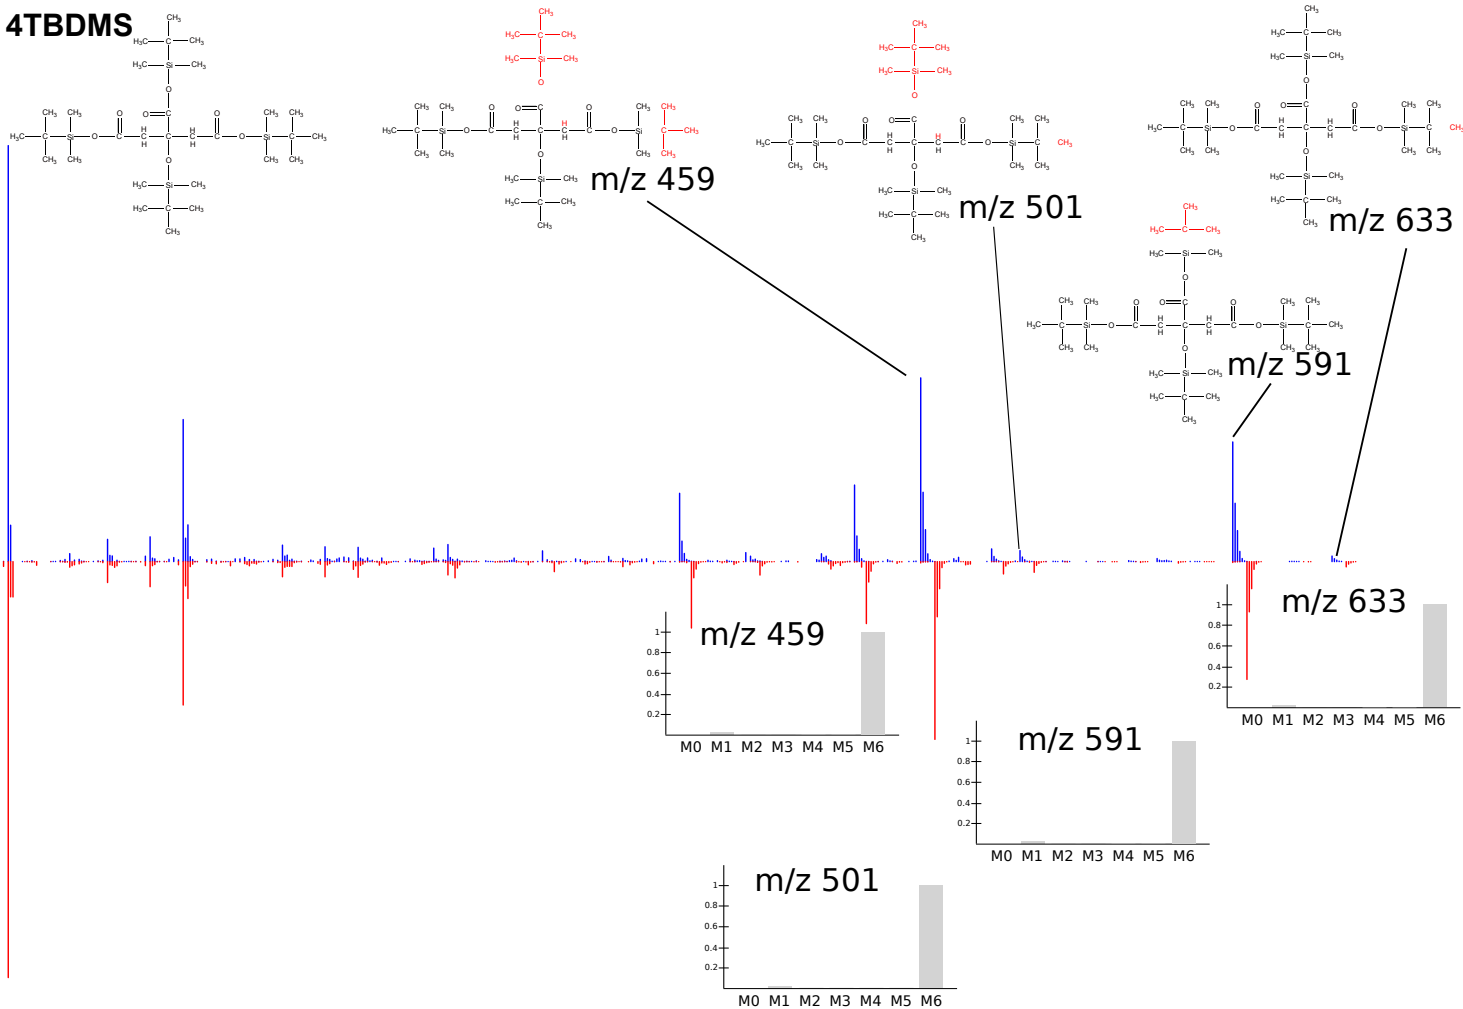

**<sup>13</sup>C<sub>6</sub> Citric acid 4TBDMS**



# Fumaric acid 2TBDMS

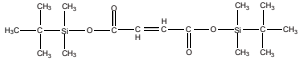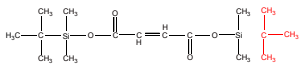

m/z 287

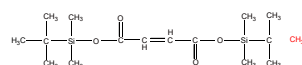

m/z 329

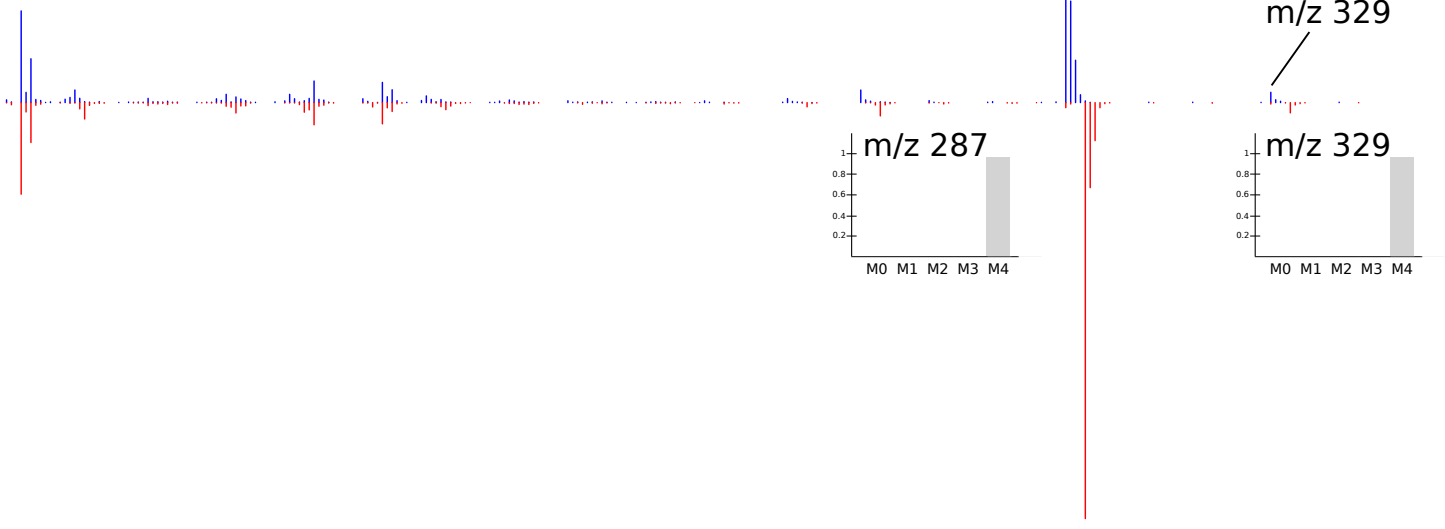

# <sup>13</sup>C<sub>4</sub> Fumaric acid 2TBDMS

# gamma-Aminobutyric acid 2TBDMS

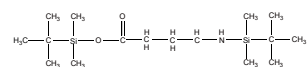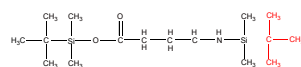

m/z 274

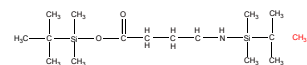

m/z 316

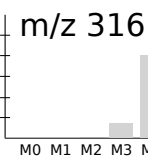

m/z 274

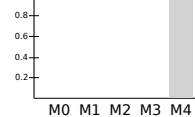

# <sup>13</sup>C<sub>4</sub> gamma-Aminobutyric acid 2TBDMS

**Glutamic acid 3TBDMS**

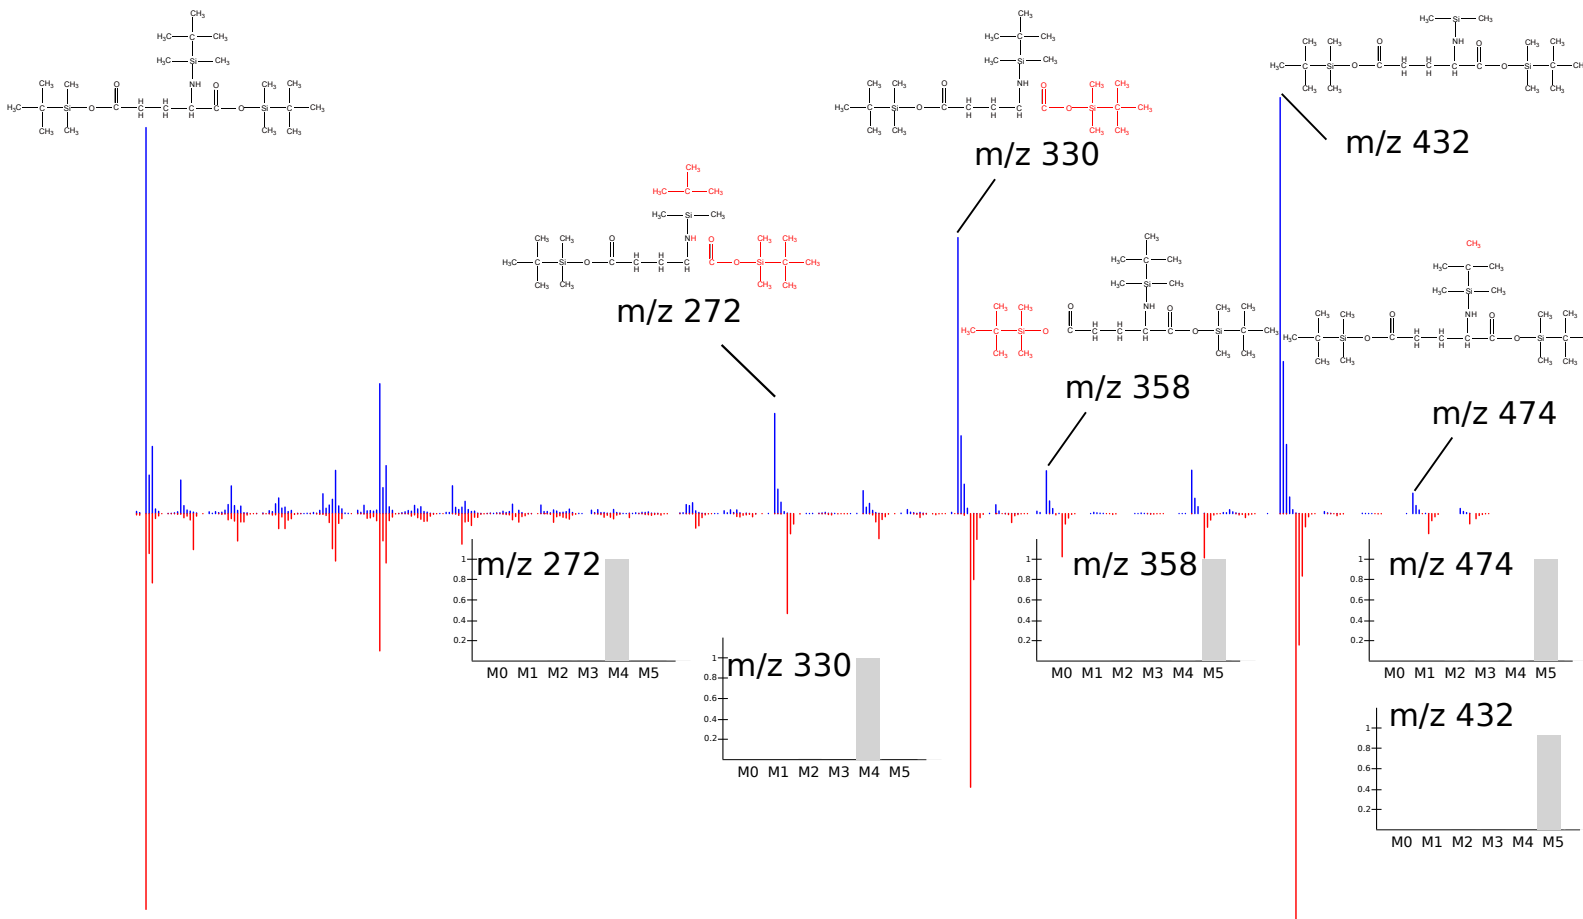

**<sup>13</sup>C<sub>5</sub> Glutamic acid 3TBDMS**

# Glutamine 3TBDMS

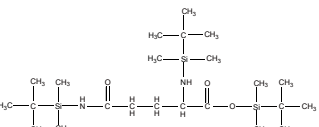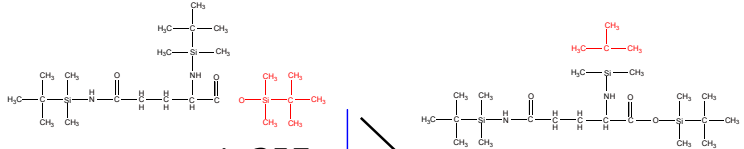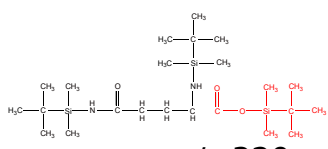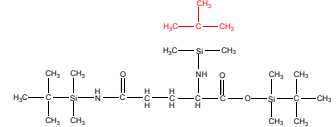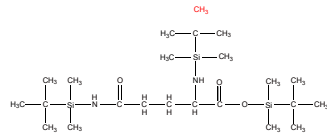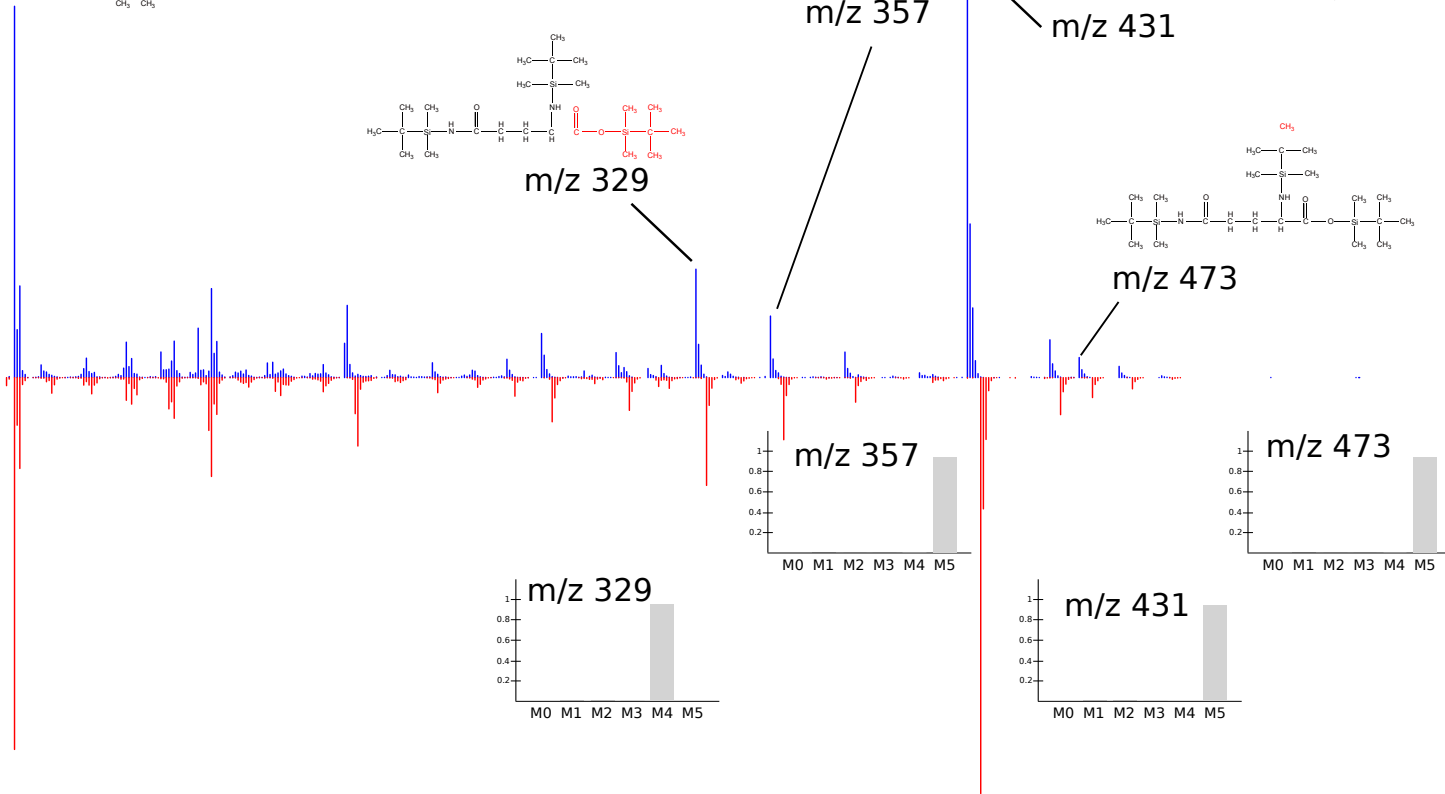

# <sup>13</sup>C<sub>5</sub> Glutamine 3TBDMS

# Glycine 2TBDMS

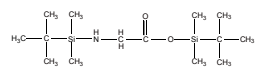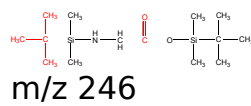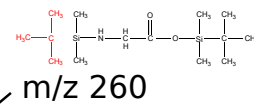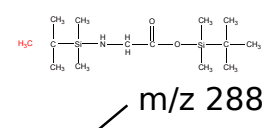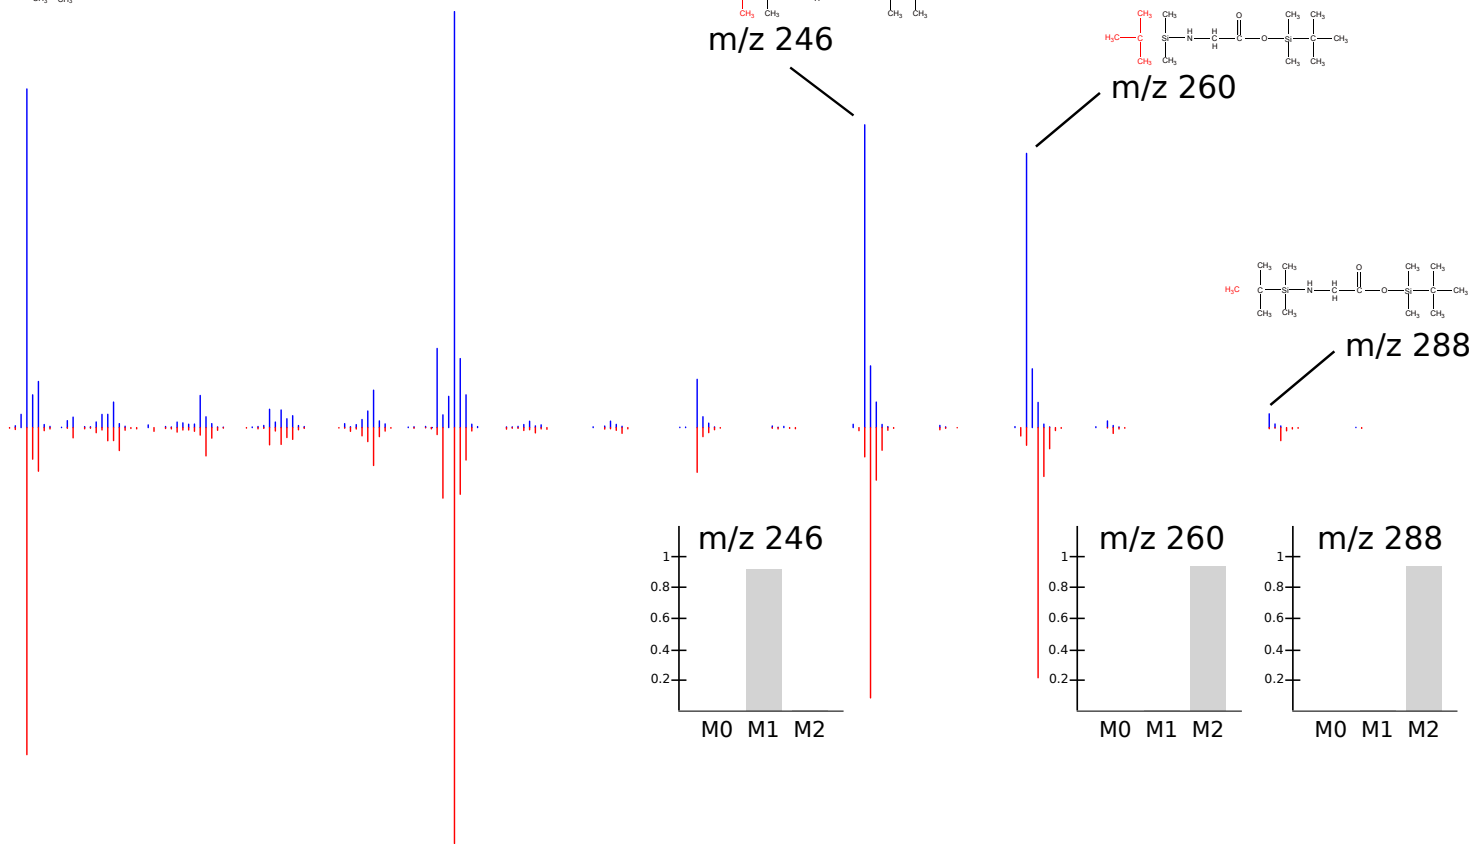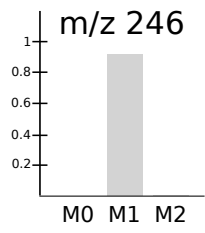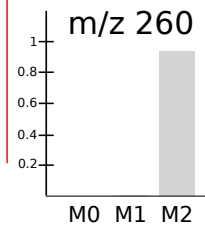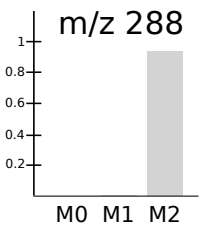

# <sup>13</sup>C<sub>2</sub> Glycine 2TBDMS

## Histidine 3TBDMS

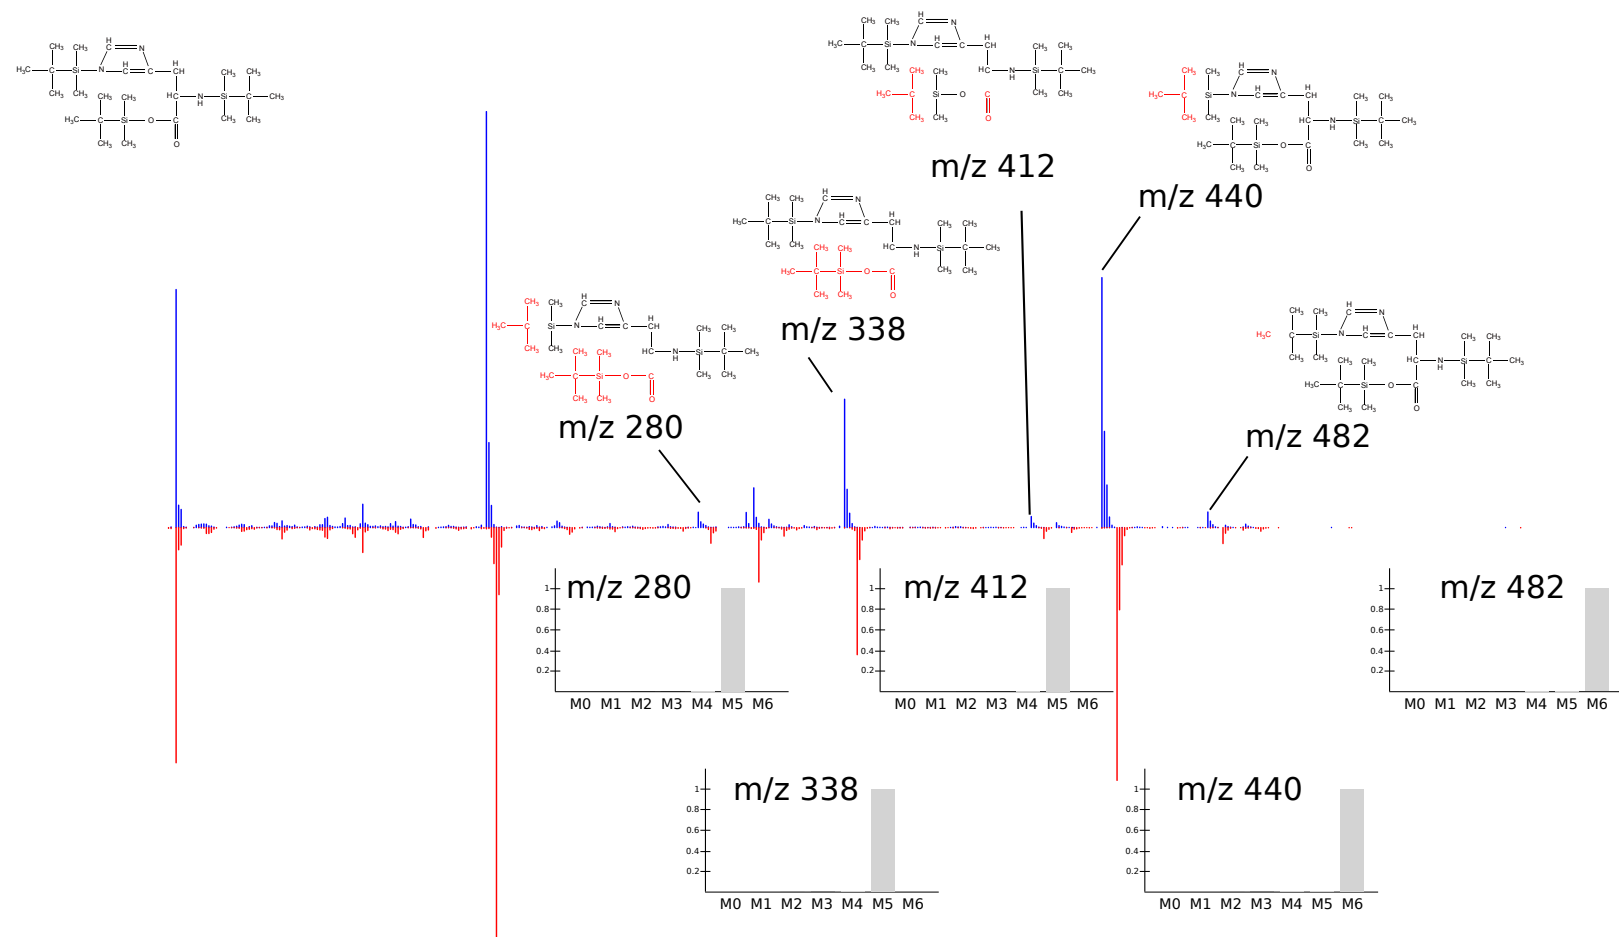

## $^{13}\text{C}_6$ Histidine 3TBDMS

**Isoleucine 2TBDMS**

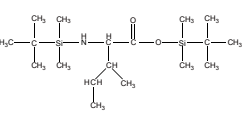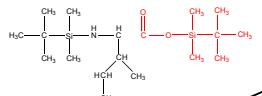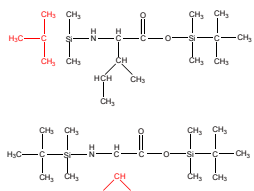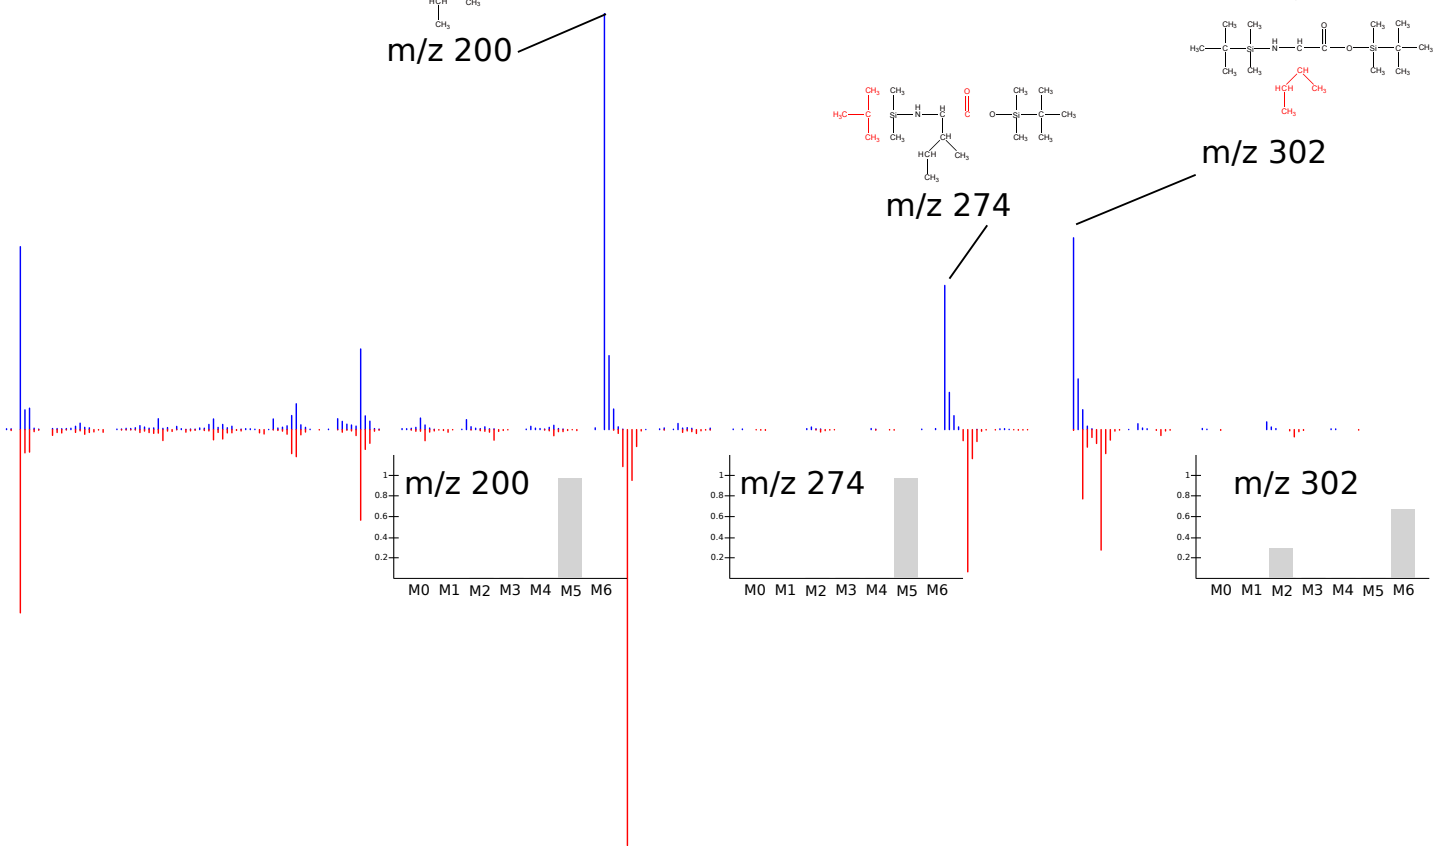

**<sup>13</sup>C<sub>6</sub> Isoleucine 2TBDMS**

## Leucine 2TBDMS

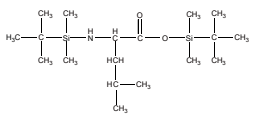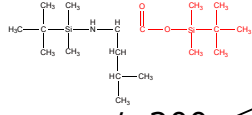

m/z 200

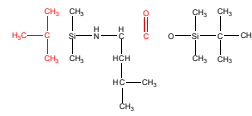

m/z 274

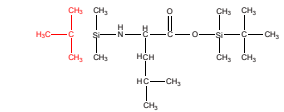

m/z 302

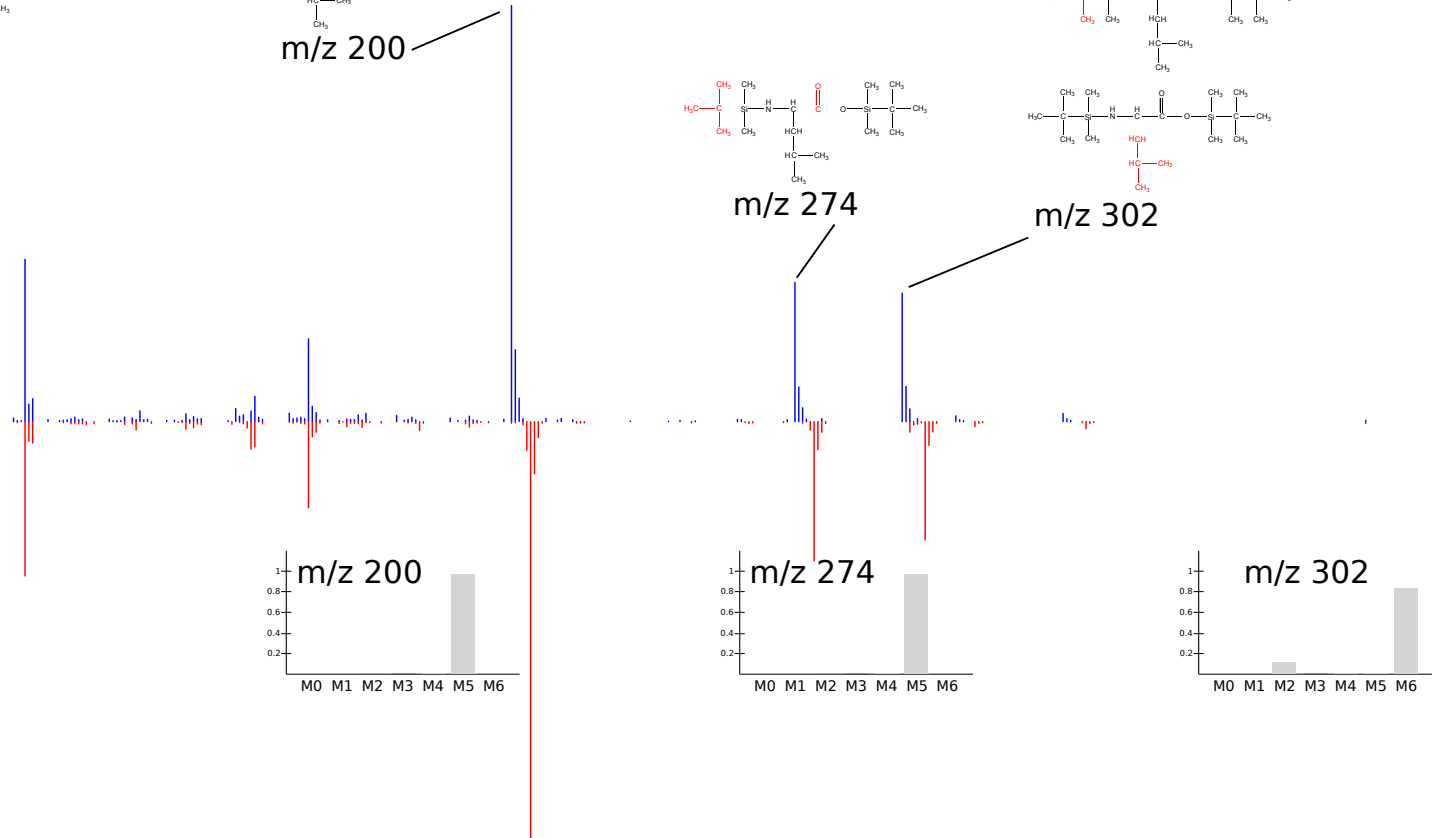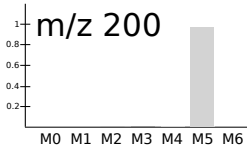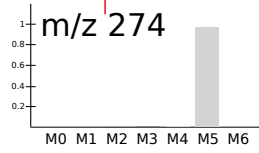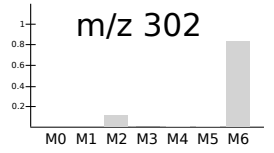

## <sup>13</sup>C<sub>6</sub> Leucine 2TBDMS



# Lysine 3TBDMS

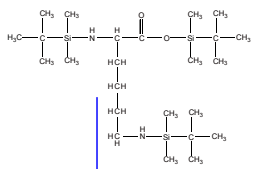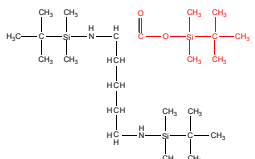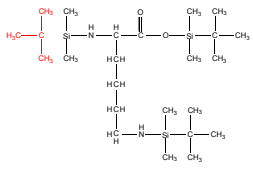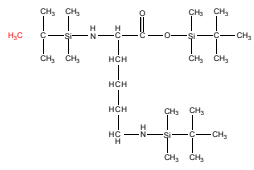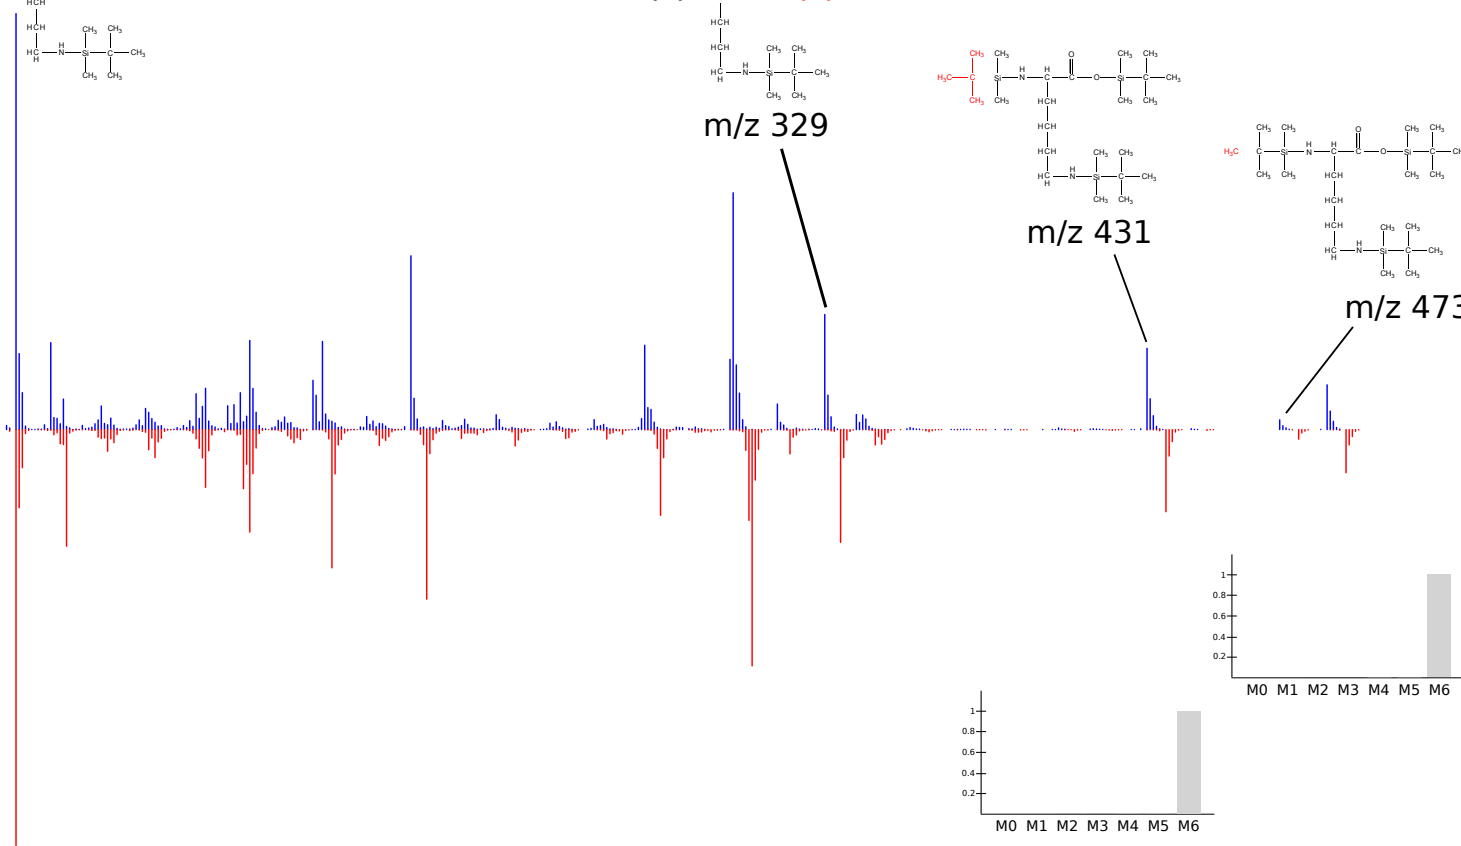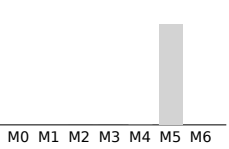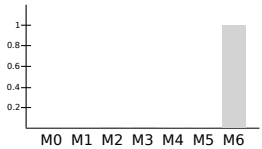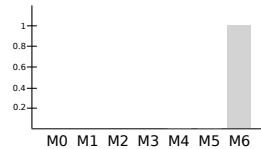

# <sup>13</sup>C<sub>6</sub> Lysine 3TBDMS

# Malic acid 3TBDMS

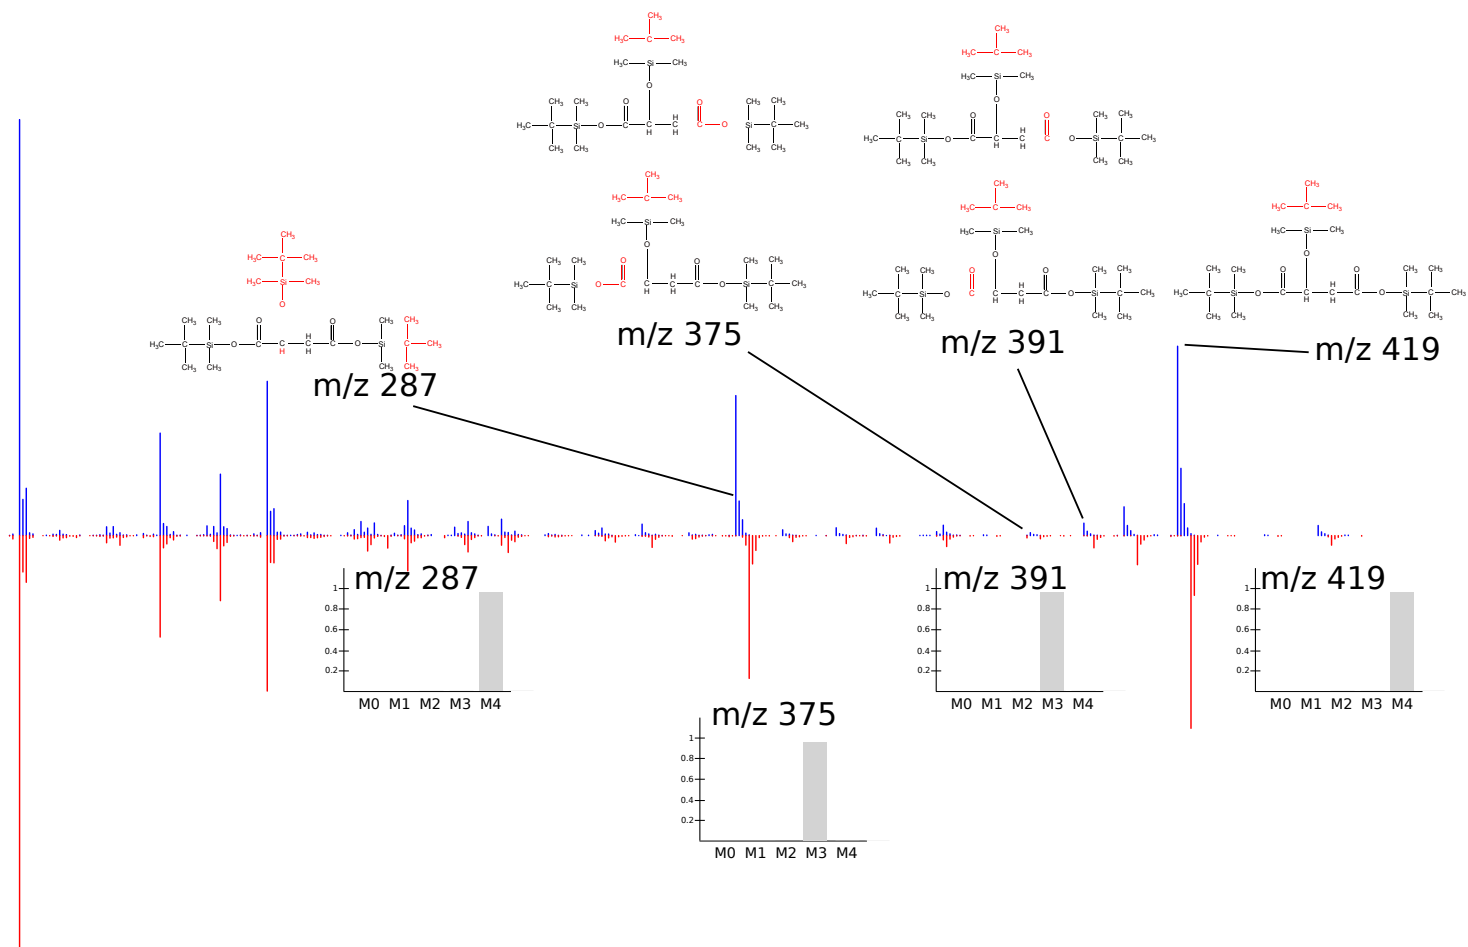

# <sup>13</sup>C<sub>4</sub> Malic acid 3TBDMS

**Ornithine 3TBDMS**

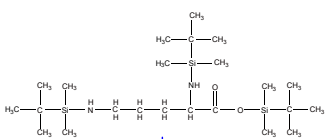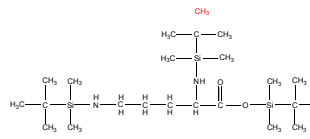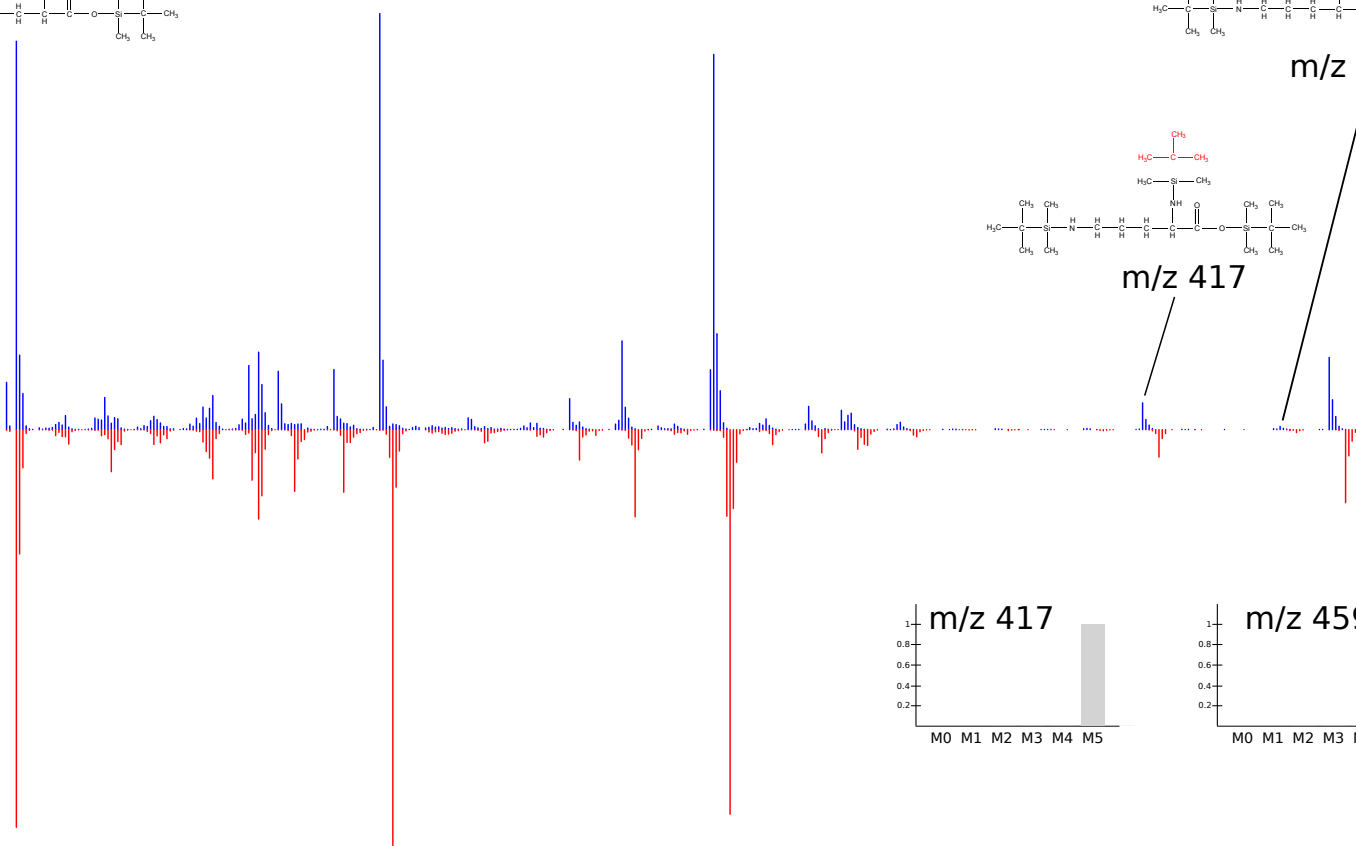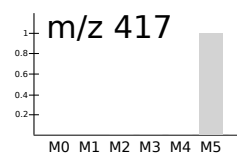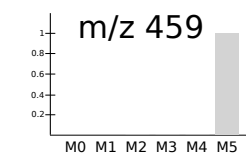

**<sup>13</sup>C<sub>5</sub> Ornithine 3TBDMS**

# Phenylalanine 2TBDMS

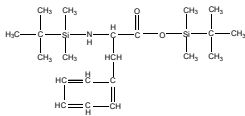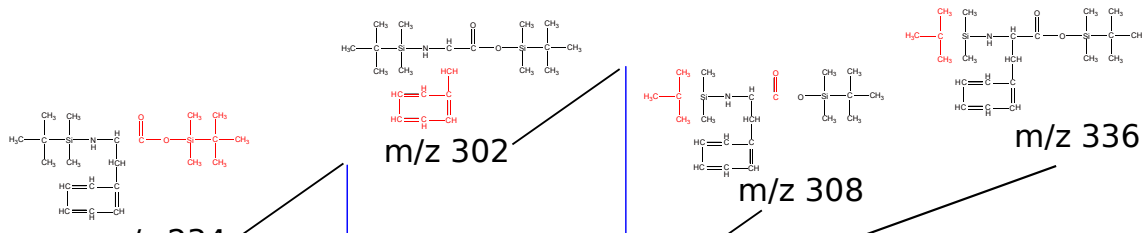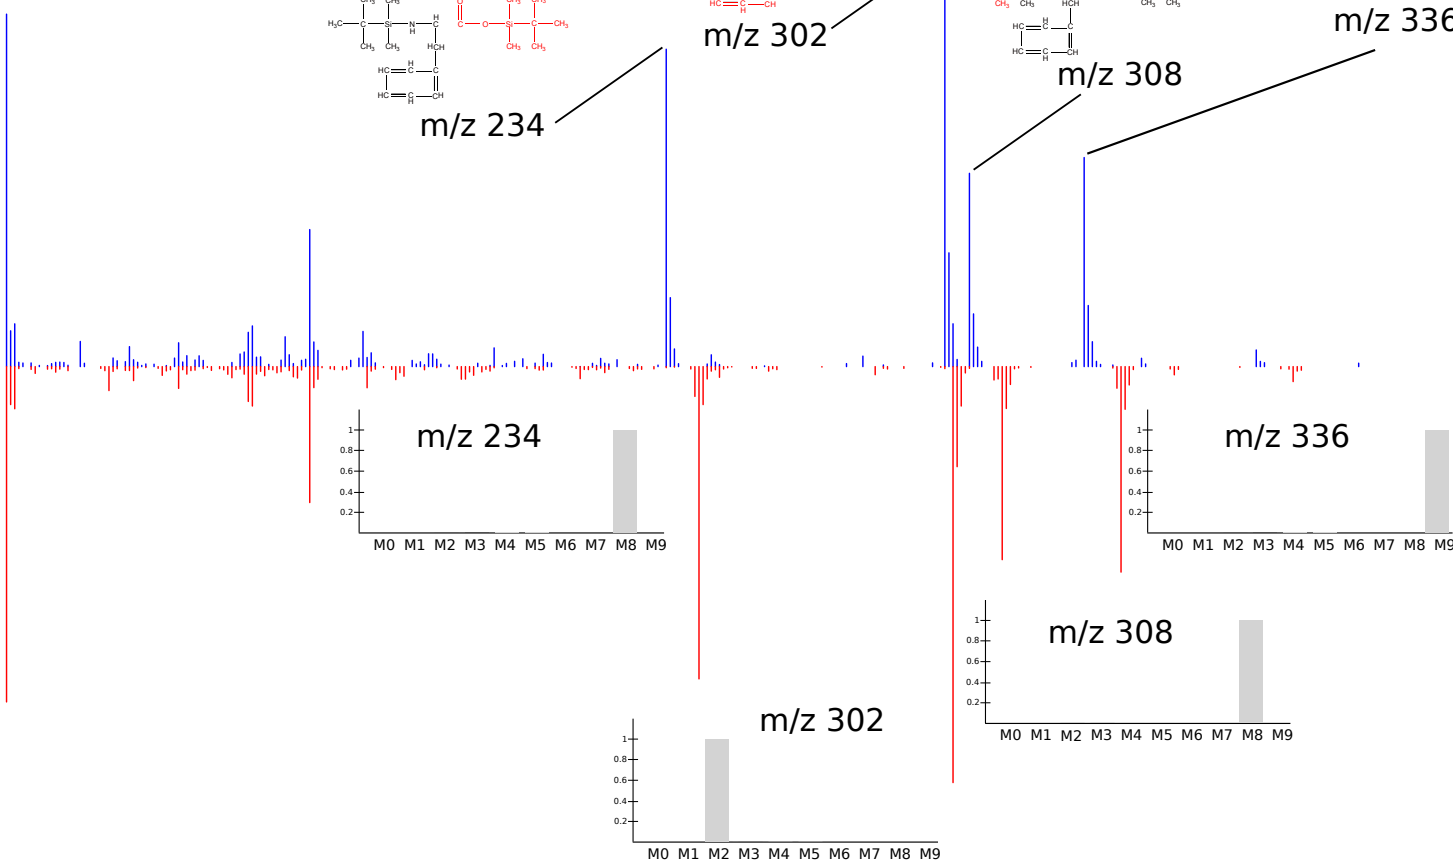

# Phenylalanine 4TBDMS <sup>13</sup>C

# Serine 3TBDMS

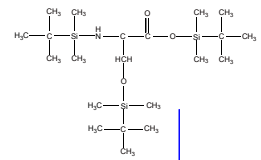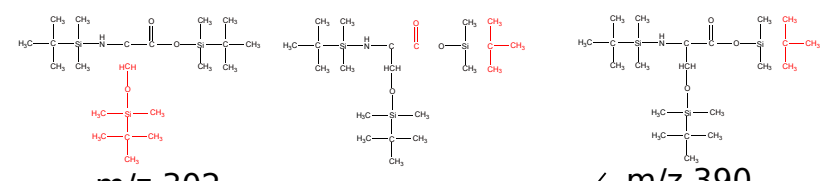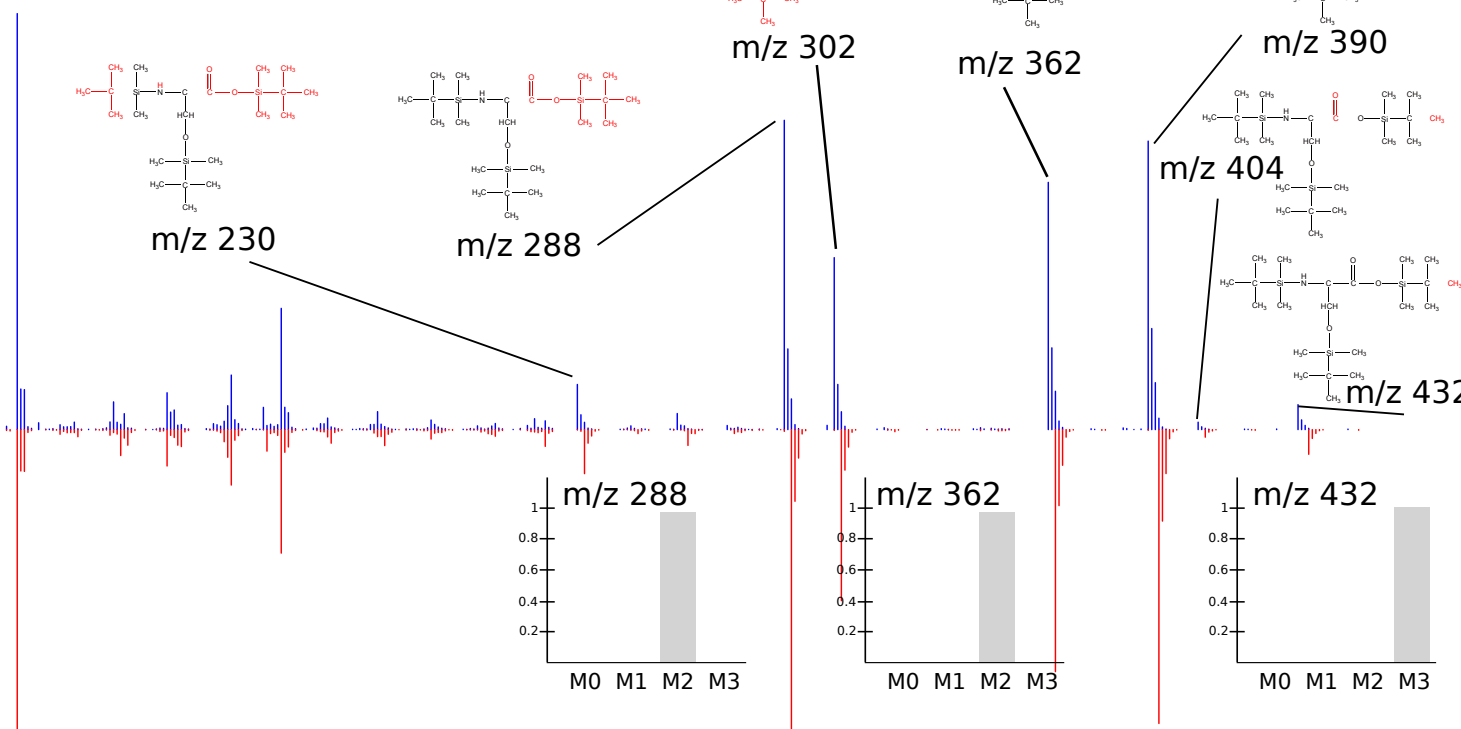

# <sup>13</sup>C<sub>3</sub> Serine 3TBDMS

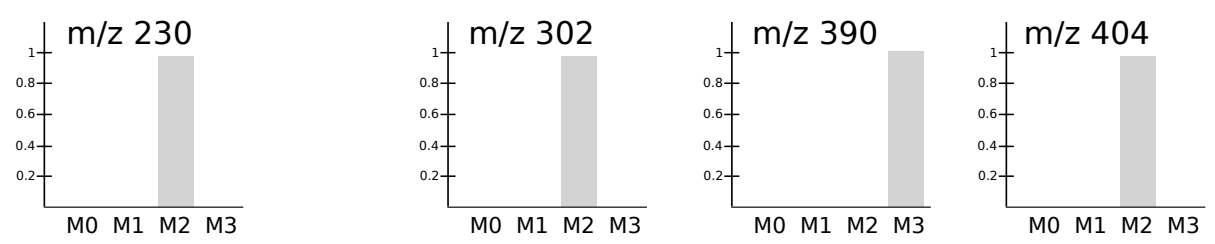

# Succinic acid 2TBDMS

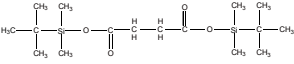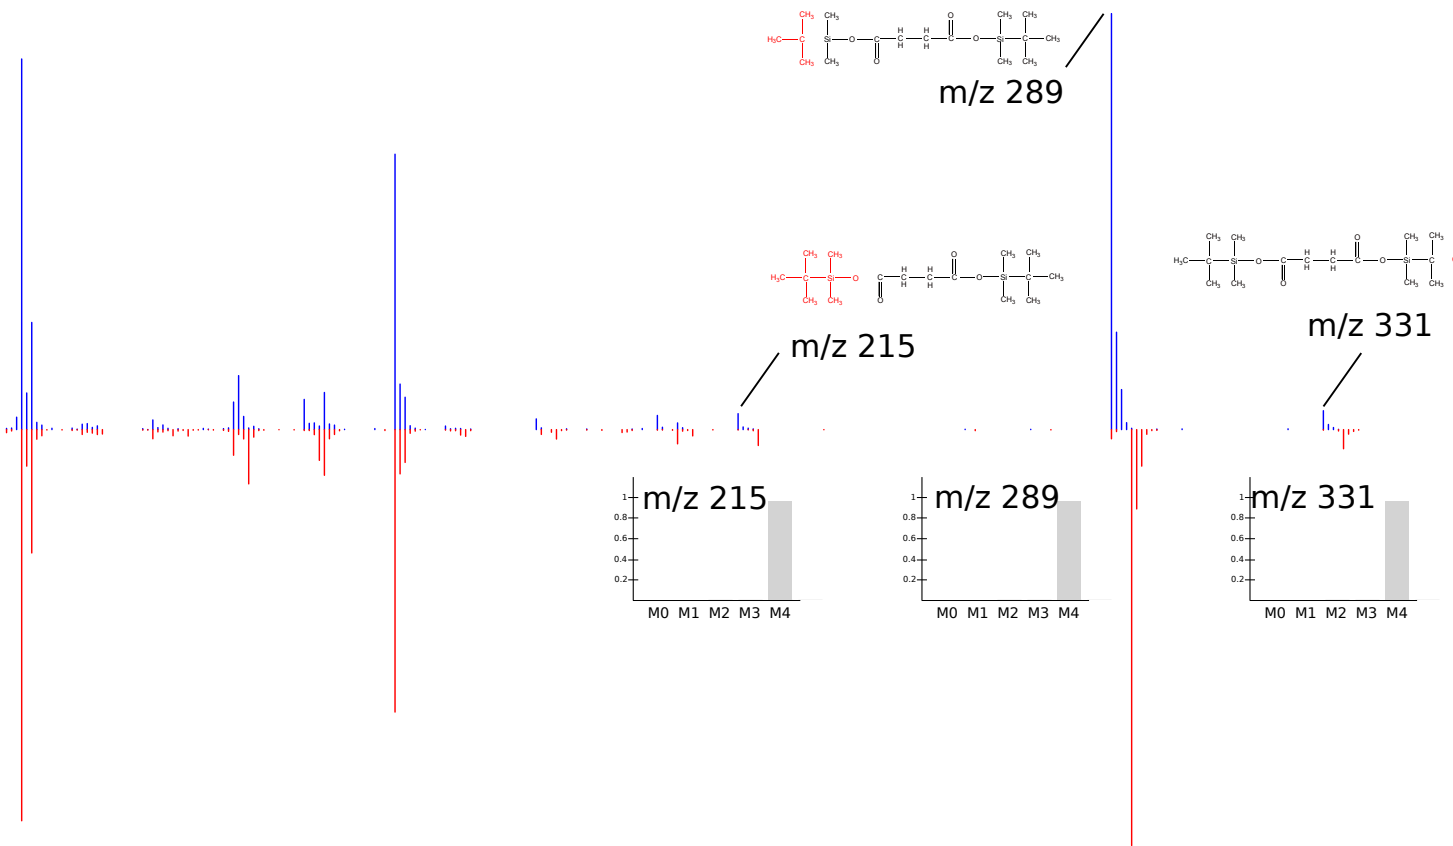

# <sup>13</sup>C<sub>4</sub> Succinic acid 2TBDMS

# Tyrosine 3TBDMS

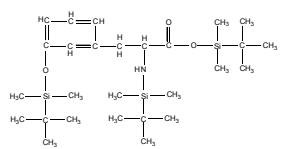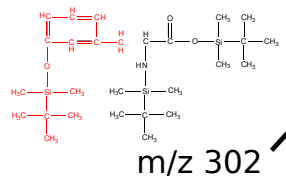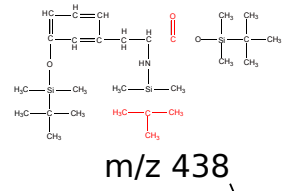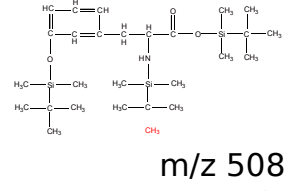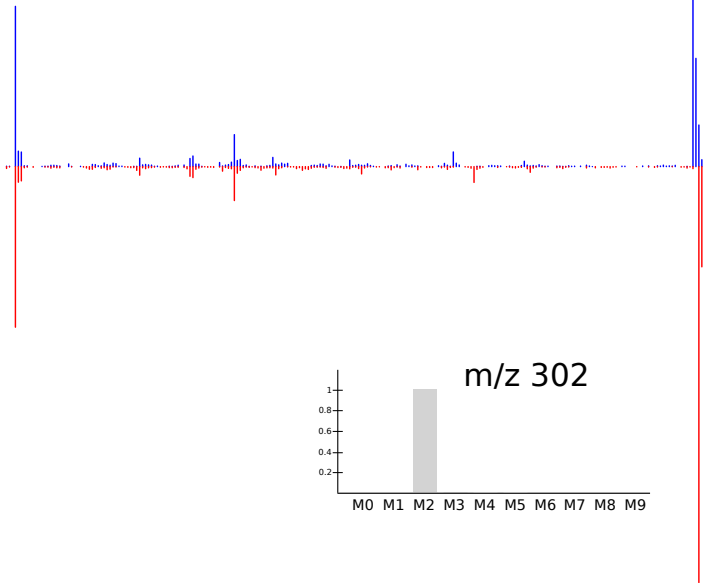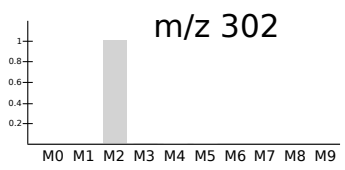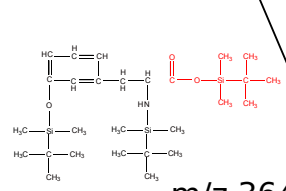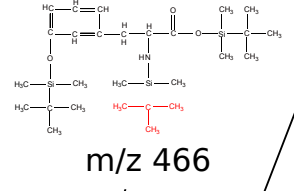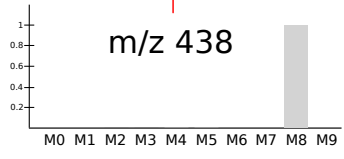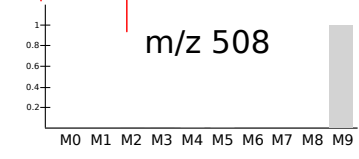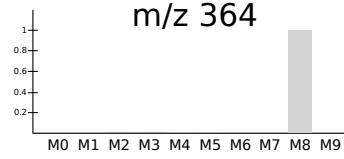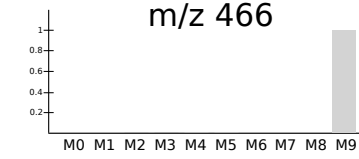

# <sup>13</sup>C<sub>9</sub> Tyrosine 3TBDMS

# Valine 2TBDMS

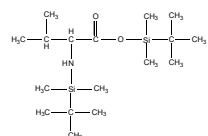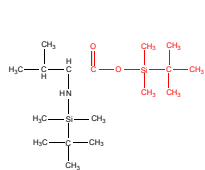

$m/z$  186

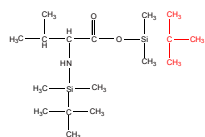

$m/z$  260

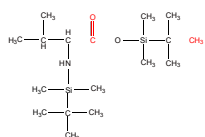

$m/z$  288

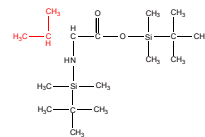

$m/z$  302

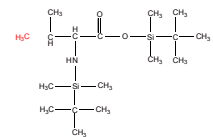

$m/z$  330

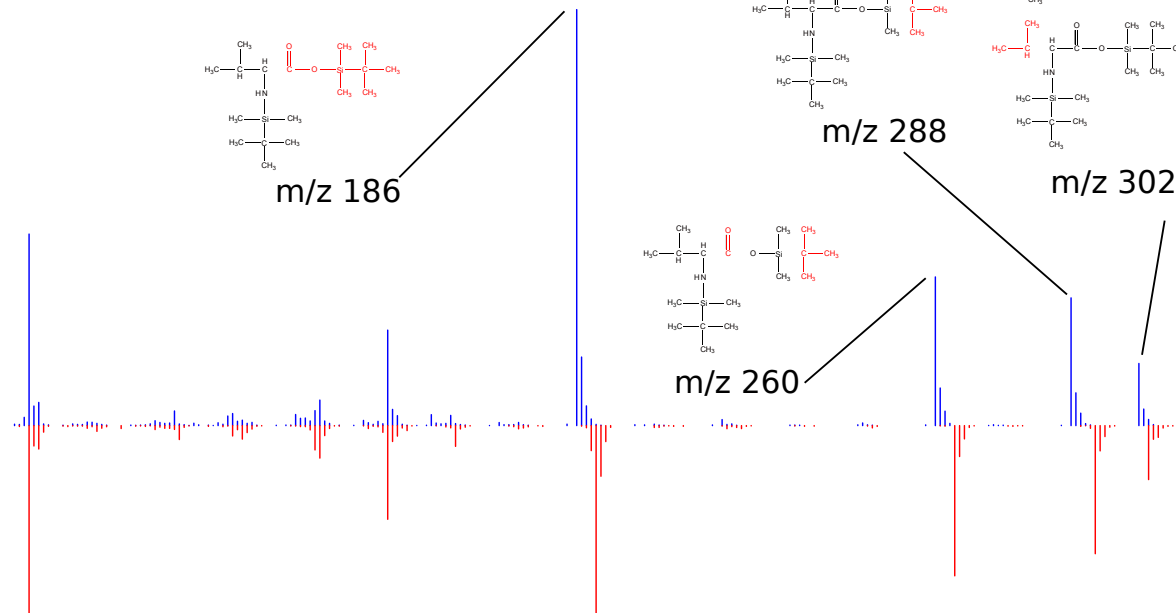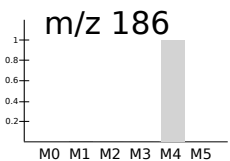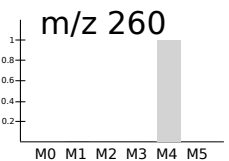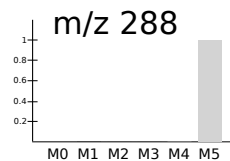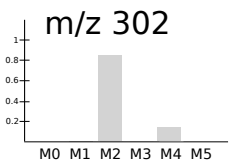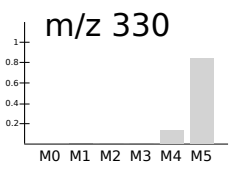

# $^{13}\text{C}_5$ Valine 2TBDMS
